# Supplementary material for: Light-fluorous safety-catch arylgermanes ? exceptionally robust, photochemically activated precursors for biaryl synthesis by Pd(0) catalysed cross-coupling
Source: Royal Society of Chemistry journal article supplement (doi:10.1039/b707517k), 2007-01-01

**Light-fluorous Safety-catch Arylgermanes – Exceptionally Robust, Photochemically Activated Precursors for Biaryl Synthesis by Pd(0) Catalysed Cross-coupling**

Alan C. Spivey,<sup>a\*</sup> Chih-Chung Tseng,<sup>a</sup> Joseph P. Hannah,<sup>a</sup> Christopher J.G. Gripton,<sup>b</sup> Paul de Fraine,<sup>c</sup> Nigel J. Parr,<sup>d</sup> and Jan J. Scicinski<sup>d</sup>

<sup>a</sup>*Department of Chemistry, South Kensington campus, Imperial College, London, London, SW7 2AZ, UK*

<sup>b</sup>*Department of Chemistry, University of Sheffield, Brook Hill, Sheffield, S3 7HF, UK*

<sup>c</sup>*Discovery Chemistry, Syngenta, Jealott's Hill, Bracknell, Berkshire, RG42 6EY, UK*

<sup>d</sup>*Medicinal Chemistry, GlaxoSmithKline, Gunnelswood Road, Stevenage, Hertfordshire, SG1 2NY, UK.*

|                                                                                             |       |
|---------------------------------------------------------------------------------------------|-------|
| General directions.....                                                                     | 2     |
| Synthesis of substrates for Table 1.....                                                    | 2-8   |
| Photolysis/cross-coupling reactions (Table 1).....                                          | 8-15  |
| Stability profiling of light-fluorous phenylgermane <b>1c</b> (Table 2).....                | 15-16 |
| Synthesis of Boscalid <sup>®</sup> and derivatives (Scheme 1).....                          | 16-23 |
| Acknowledgement & references.....                                                           | 23-24 |
| <sup>1</sup> H, <sup>13</sup> C and <sup>19</sup> F NMR spectra for all new compounds ..... | 25-63 |

## General directions

**Solvents and reagents:** Solvents were distilled as follows: THF and Et<sub>2</sub>O over Na-benzophenone ketyl, toluene over Na, CH<sub>2</sub>Cl<sub>2</sub> and DMF over CaH<sub>2</sub>; HPLC grade EtOAc and petrol were used as commercially supplied. Reagents were used as commercially supplied unless otherwise stated and handled in accordance with COSHH regulations. **Chromatography:** Flash chromatography (FC) was carried out on Silica gel (BDH Silica gel for FC) according to the method described by Still,<sup>1</sup> or by using either Isolute Flash Silica (1 g, 5 g, 50 g) or Varian Bond Elute Si (10 g) SPE cartridges in conjunction with a Varian Vac-Elut-20 vacuum manifold. Alumina was grade 1 basic supplied by BDH. TLC was performed on aluminium backed silica gel plates (Merck Silica gel 60 F<sub>254</sub>) which were developed with UV fluorescence (254 nm and 365 nm) and KMnO<sub>4</sub>(aq)/Δ. **<sup>1</sup>H NMR spectra:** These were recorded at 250 MHz on Bruker AC-250 instrument or at 400 MHz on a Bruker AM-400 instrument. Chemical shifts (δ<sub>H</sub>) are given in parts per million (ppm) as referenced to the appropriate residual solvent peak. Broad signals are assigned as b. **<sup>13</sup>C NMR spectra:** These were recorded at 63 MHz on a Bruker AC-250 instrument or at 101 MHz on a Bruker AM-400 instrument. Chemical shifts (δ<sub>C</sub>) are given in parts per million (ppm) as referenced to CHCl<sub>3</sub>, and are assigned as s, d, t, and q, for C, CH, CH<sub>2</sub>, and CH<sub>3</sub> respectively; The chemical shift of carbons on the fluorine-tag were recorded by applying fluorine-decoupling at δ -125.1 ppm during <sup>13</sup>C NMR acquisition. **<sup>19</sup>F NMR spectra:** These were recorded at 367 MHz on a Bruker AM-400 instrument. Chemical shifts (δ<sub>F</sub>) are given in parts per million (ppm) as referenced to CFCl<sub>3</sub>. **Mass Spectra:** Low resolution and high-resolution spectra were recorded on a VG Prospec spectrometer, with molecular ions and major peaks being reported. Intensities are given as percentages of the base peak. Molecular weights are calculated using <sup>74</sup>Ge, <sup>35</sup>Cl and <sup>79</sup>Br isotopes. HRMS values are valid to ±5 ppm. **GC-MS:** Analyses were carried out using a Finnigan Trio-1000 EI<sup>+</sup> mass spectrometer and HP-8590 gas chromatograph. GC retention times are given in minutes. MS data is reported as above. **HPLC:** Analyses were carried out using a HP-1100 liquid chromatograph. LC retention times are given in minutes. **Elemental analysis:** Analyses were carried out by Mr Steven Boyer of London Metropolitan University Services Ltd. **Melting points:** Analyses were carried out using a Khofler hot stage and are uncorrected. **Photochemistry:** Photolytic oxidation was carried out using a 125 Watt Cathodeon high pressure Hg vapour lamp (type HPK 125) cooled by a rotary fan.

## Synthesis of substrates for Table 1

### Trichloro-(3,3,4,4,5,5,6,6,7,7,8,8,9,9,10,10,10-heptadecafluorodecyl)germane

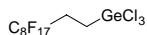

*1H<sub>2</sub>,2H<sub>2</sub>-Perfluorodecyl iodide* (12.5 g, 41.56 mmol) and germanium(II) chloride dioxane complex<sup>2</sup> (5.00 g, 41.56 mmol) were heated in a Carius tube at 150 °C for 24 h. After cooling to rt, the reaction mixture was diluted with CH<sub>2</sub>Cl<sub>2</sub> (500 mL) and added dropwise to H<sub>2</sub>O (500 mL). The resulting white precipitate was collected by filtration, washed with H<sub>2</sub>O (300 mL) then CH<sub>2</sub>Cl<sub>2</sub> (300 mL) and dried under suction. The dried precipitate was stirred in conc. HCl (37% w/v) for 16 h and then extracted with CH<sub>2</sub>Cl<sub>2</sub> (5 × 100 mL). The combined organic extracts were dried over MgSO<sub>4</sub> and concentrated *in vacuo* to give *trichloro-(3,3,4,4,5,5,6,6,7,7,8,8,9,9,10,10,10-heptadecafluorodecyl)germane* as a brown oil (9.70 g, 78%). <sup>1</sup>H NMR (400 MHz; CDCl<sub>3</sub>): δ 2.20 (m, 2H, CH<sub>2</sub>CH<sub>2</sub>Ge), 2.47 (m, 2H, CH<sub>2</sub>CH<sub>2</sub>Ge); <sup>13</sup>C NMR (100 MHz; CDCl<sub>3</sub>): δ 22.1 (t),

25.0 (t,  $J_{CF}$  23.0), 108.6 (m), 110.5 (m), 113.5 (m), 114.4 (m), 115.7 (m), 116.9 (t), 117.3 (m), 118.6 (m);  $^{19}\text{F}$  NMR (376 MHz;  $\text{CDCl}_3$ ):  $\delta$  - 126.5 [s, 2F,  $\text{CF}_2(\text{CH}_2)_2$ ], -123.2 (s, 2F), -122.6 (s, 2F), -121.8 (s, 4F,  $4 \times \text{CF}_2$ ), -121.6 (s, 2F), -115.3 (s, 2F), -80.7 [s, 3F,  $\text{CF}_3(\text{CF}_2)_7(\text{CH}_2)_2$ ]; IR  $\nu_{\text{max}}$  (neat) 1442 (C-F), 1367, 1243, 906, 826  $\text{cm}^{-1}$ ;  $m/z$  ( $\text{Cl}^+$ ) (rel. intensity) 606 [(M-F) $^+$ , 41], 590 (4), 464 (33), 158 (23), 109 (20); Analysis for  $\text{C}_{10}\text{H}_4\text{GeCl}_3\text{F}_{17}$  expected C 19.18%, H 0.64%, found C 19.19%, H 0.54%.

### (3,3,4,4,5,5,6,6,7,7,8,8,9,9,10,10,10-Heptadecafluorodecyl)tris-(4-methoxyphenyl)germane

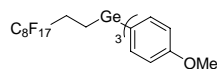

To a solution of *trichloro*-(3,3,4,4,5,5,6,6,7,7,8,8,9,9,10,10,10-heptadecafluorodecyl)germane (2.50 g, 3.987 mmol) in THF (15.0 mL) was added a solution of 4-methoxyphenylmagnesiumbromide (40.0 mL, 20.0 mmol, 0.5 M). The resulting reaction mixture was stirred at reflux for 3 h. The yellow reaction mixture was cooled to 0 °C before quenching dropwise with methanol until effervescence ceased. The reaction mixture was diluted with  $\text{Et}_2\text{O}$  (20.0 mL) and washed with water ( $2 \times 20.0$  mL). The combined organic extracts were dried over  $\text{MgSO}_4$  and the solvent was removed *in vacuo*. Sublimation of 4,4'-bismethoxybiphenyl from the residue (100 °C / 0.1 mmHg using a Kugelrohr) followed by purification by FC (petrol/ $\text{CH}_2\text{Cl}_2$  50/50  $\rightarrow$   $\text{CH}_2\text{Cl}_2$ ) and drying under high vacuum gave (3,3,4,4,5,5,6,6,7,7,8,8,9,9,10,10,10-heptadecafluorodecyl)tris-(4-methoxyphenyl)germane as a white amorphous solid (2.84 g, 85%). mp 55-57 °C;  $R_f$  0.35 (petrol/ $\text{CH}_2\text{Cl}_2$ , 70/30);  $^1\text{H}$  NMR (400 MHz;  $\text{CDCl}_3$ ):  $\delta$  1.63 (m, 2H,  $\text{CH}_2\text{CH}_2\text{Ge}$ ), 2.19 (m, 2H,  $\text{CH}_2\text{CH}_2\text{Ge}$ ), 3.81 (s, 9H,  $3 \times \text{ArOCH}_3$ ), 6.94 (d,  $J = 8.5$  Hz, 6H, ArH), 7.37 (d,  $J = 8.5$  Hz, 6H, ArH);  $^{13}\text{C}$  NMR (100 MHz;  $\text{CDCl}_3$ )  $\delta$  3.7 (t), 27.0 (t,  $J_{CF}$  23.0), 55.0 (3q), 114.0 (6d), 118.9 (3s), 126 (6d), 160.6 (3s), eight carbons not observed;  $^{19}\text{F}$  NMR (376 MHz;  $\text{CDCl}_3$ ):  $\delta$  - 126.3 (s, 2F), -123.2 (s, 2F), -122.7 (s, 2F), -122.1 (s, 4F,  $2 \times \text{CF}_2$ ), -121.9 (s, 2F), -115.3 (s, 2F), -80.8 [s, 3F,  $\text{CF}_3(\text{CF}_2)_7(\text{CH}_2)_2$ ]; IR  $\nu_{\text{max}}$  (neat) 3020 (C-H), 1438 (C-F), 1365, 1243, 902, 836  $\text{cm}^{-1}$ ;  $m/z$  ( $\text{EI}^+$ ) (rel. intensity) 841 ( $\text{M}^+$ , 9), 735 (42), 715 (24), 395 (100); HRMS ( $\text{EI}^+$ ) calc'd. for  $\text{C}_{31}\text{H}_{24}^{74}\text{GeO}_3\text{F}_{17}$  ( $\text{M}^+$ ) 841.0666, found 841.0705,  $\Delta$  -4.6 ppm; Analysis for  $\text{C}_{31}\text{H}_{24}\text{GeO}_3\text{F}_{17}$  expected C 44.27%, H 3.00%, found C 44.21%, H 2.95%.

### Dichloro-(3,3,4,4,5,5,6,6,7,7,8,8,9,9,10,10,10-heptadecafluorodecyl)(4-methoxyphenyl)germane

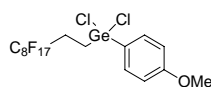

To a solution of (3,3,4,4,5,5,6,6,7,7,8,8,9,9,10,10,10-heptadecafluorodecyl)tris-(4-methoxyphenyl)germane (2.84 g, 3.377 mmol) in  $\text{CH}_2\text{Cl}_2$  (20.0 mL) was added conc. HCl (20.0 mL, 240 mmol, 12.0 M). The reaction mixture was stirred for 16 h and the solvent was then removed *in vacuo* to give dichloro-(3,3,4,4,5,5,6,6,7,7,8,8,9,9,10,10,10-heptadecafluorodecyl)(4-methoxyphenyl)germane as a white amorphous solid (2.32 g, 98%).  $^1\text{H}$  NMR (400 MHz;  $\text{CDCl}_3$ ):  $\delta$  1.95 (m, 2H,  $\text{CH}_2\text{CH}_2\text{Ge}$ ), 2.45 (m, 2H,  $\text{CH}_2\text{CH}_2\text{Ge}$ ), 3.81 (s, 3H,  $3 \times \text{ArOCH}_3$ ), 6.92 (d,  $J = 8.5$  Hz, 2H, ArH), 7.35 (d,  $J = 8.5$  Hz, 2H, ArH);  $^{13}\text{C}$  NMR (100 MHz;  $\text{CDCl}_3$ )  $\delta$  15.3 (t), 25.4 (t,  $J_{CF} = 23.0$  Hz), 55.3 (q), 114.8 (2d), 125.1 (s), 133.7 (2d) 162.7 (s), eight carbons not observed;  $^{19}\text{F}$  NMR (376 MHz;  $\text{CDCl}_3$ ):  $\delta$  - 126.2 (s, 2F), -123.3 (s, 2F), -122.7 (s, 2F), -122.1 (s, 4F,  $2 \times \text{CF}_2$ ), -121.9 (s, 2F), -115.4 ( $\text{CF}_2$ ) $_6\text{CF}_2\text{CF}_3$ ], -80.8 (t, 3F, ( $\text{CF}_2$ ) $_6\text{CF}_2\text{CF}_3$ ); IR  $\nu_{\text{max}}$  (KBr) 3033 (C-H), 2975 (C-H) 1595 (C=C), 1504, 1455 (C-F), 1201, 958, 826  $\text{cm}^{-1}$ ;  $m/z$  ( $\text{EI}^+$ ) (rel. intensity) 698 [ $\text{M}^{(35}\text{Cl}_2)^+$ , 47], 663 (4), 295 (12), 251

(100), 235 (16); HRMS ( $\text{EI}^+$ ) calc'd. for  $\text{C}_{17}\text{H}_{11}^{74}\text{GeO}^{35}\text{Cl}_2\text{F}_{17}$  ( $\text{M}^+$ ) 697.9127, found 697.9125,  $\Delta$  0.3 ppm;  
Analysis for  $\text{C}_{17}\text{H}_{11}\text{GeCl}_2\text{F}_{17}\text{O}$  expected C 29.26%, H 1.59%, found C 29.27%, H 1.64%.

**(3,3,4,4,5,5,6,6,7,7,8,8,9,9,10,10,10-Heptadecafluorodecyl)(4-methoxyphenyl)bis(naphthalen-2-ylmethyl)germane 1a**

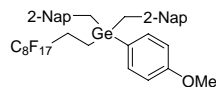

To oven dried,  $\text{I}_2$  (0.01 g, 0.04 mmol) activated magnesium turnings (0.42 g, 17.3 mmol) in  $\text{Et}_2\text{O}$  (25.0 mL) was added 2-bromomethylnaphthalene (3.68 g, 16.6 mmol) to initiate Grignard reagent formation. To this solution was added a solution of dichloro-(3,3,4,4,5,5,6,6,7,7,8,8,9,9,10,10,10-heptadecafluorodecyl)(4-methoxyphenyl)germane (2.32 g, 3.33 mmol) in  $\text{Et}_2\text{O}$  (5.0 mL) dropwise and the resulting mixture stirred for 2.5 h. A sat. solution  $\text{NH}_4\text{Cl}$  was added to the reaction mixture until no effervescence occurred and the solvent was then removed *in vacuo*. The residue taken up in  $\text{Et}_2\text{O}$  (30.0 mL) and washed with water ( $2 \times 10.0$  mL) and was dried over  $\text{MgSO}_4$ . 2-Methylnaphthalene was sublimed from the residue (60 °C/0.1mmHg using a Kugelrohr) then 1,2-bis-(2-naphthyl)ethylene was removed from the residue by recrystallisation with  $\text{Et}_2\text{O}$  (16.0 mL) at 0 °C, filtration through cotton plug and washed with hexane ( $2 \times 10.0$  mL). Solvents were then removed from the filtrate *in vacuo* and purification by FC (petrol/ $\text{CH}_2\text{Cl}_2$ , 95/5  $\rightarrow$  80/20) gave bis-(2-naphthylmethyl)germane **1a** as a yellow amorphous solid (2.59 g, 86%). mp 189-190 °C;  $R_f$  0.30 (petrol:EtOAc, 95/5);  $^1\text{H}$  NMR (400 MHz;  $\text{CDCl}_3$ ):  $\delta$  1.16 (m, 2H,  $\text{CH}_2\text{CH}_2\text{Ge}$ ), 1.87 (m, 2H,  $\text{CH}_2\text{CH}_2\text{Ge}$ ), 2.73 (s, 4H,  $2 \times \text{GeCH}_2\text{Nap}$ ), 3.85 (s, 3H,  $\text{OCH}_3$ ), 6.95 (d,  $J = 6.7$  Hz, 2H, ArH), 7.09 (dd,  $J = 6.7, 1.8$  Hz, 2H, ArH), 7.27 (d,  $J = 6.7$  Hz, 2H, ArH), 7.37 (s, 2H, ArH), 7.39-7.47 (m, 4H, ArH), 7.64 (d,  $J = 7.7$  Hz, 2H, ArH), 7.70 (d,  $J = 8.4$  Hz, 2H, ArH), 7.80 (d,  $J = 7.7$  Hz, 2H, ArH);  $^{13}\text{C}$  NMR (100 MHz;  $\text{CDCl}_3$ )  $\delta$  2.2 (t), 22.8 (t,  $J_{\text{CF}} = 23.0$  Hz), 26.4 (2t), 55.0 (q), 108.4 (s), 110.2 (s), 110.7 (2s), 111.02 (s), 113.4 (s), 114.2 (2d), 115.0 (s), 118.1 (s), 124.8 (2d), 125.8 (2d), 126.0 (2d), 127.0 (2d), 127.4 (2d), 127.6 (2d), 128.0 (2d), 131.3 (2s), 133.8 (2s), 135.1 (2d), 136.7 (3s), 160.6 (s);  $^{19}\text{F}$  NMR (376 MHz;  $\text{CDCl}_3$ ):  $\delta$  -125.2 (s, 2F), -122.5 (s, 2F), -121.7 (s, 2F), -120.9 (m, 6F), -115.4 [quintet,  $J = 14.8$  Hz, 2F,  $(\text{CF}_2)_6\text{CF}_2\text{CF}_3$ ], -79.8 (t,  $J = 10.0$  Hz, 3F,  $(\text{CF}_2)_6\text{CF}_2\text{CF}_3$ ); IR  $\nu_{\text{max}}$  (neat) 3031 (C-H), 2925 (C-H), 1628, 1590 (C=C), 1422 (C-F), 1282, 1245, 1201, 1146, 820  $\text{cm}^{-1}$ ;  $m/z$  ( $\text{EI}^+$ ) (rel. intensity) 910 ( $\text{M}^+$ , 9), 769 (89), 436 (3), 341 (52), 141 (100); HRMS ( $\text{EI}^+$ ) calc'd. for  $\text{C}_{39}\text{H}_{29}^{74}\text{GeF}_{17}\text{O}$  ( $\text{M}^+$ ) 910.1159, found 910.1145,  $\Delta$  1.6 ppm; Analysis for  $\text{C}_{39}\text{H}_{29}\text{GeF}_{17}\text{O}$  expected C 51.52%, H 3.21%, found C 51.68%, H 3.11%.

**Bromo-(3,3,4,4,5,5,6,6,7,7,8,8,9,9,10,10,10-heptadecafluorodecyl)bis-(naphthalen-2-ylmethyl)germane**

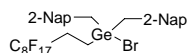

To a solution of 4-anisyl germane **1a** (0.102 g, 0.112 mmol) in  $\text{CH}_2\text{Cl}_2$  (10.0 mL) was added a solution of conc. HBr (2.0 mL, 48% wt.). The resulting biphasic reaction mixture was stirred at rt for 12 h, extracted with  $\text{Et}_2\text{O}$  ( $3 \times 20.0$  mL). The combined organic extracts were dried over  $\text{MgSO}_4$  and evaporated *in vacuo* to give bromo-(3,3,4,4,5,5,6,6,7,7,8,8,9,9,10,10,10-heptadecafluorodecyl)bis-(naphthalen-2-ylmethyl)germane as a brown amorphous solid (0.087 g, 88%). mp 172-174 °C;  $^1\text{H}$  NMR (400 MHz;  $\text{CDCl}_3$ ):  $\delta$  1.38 (m, 2H,  $\text{C}_8\text{F}_{17}\text{CH}_2\text{CH}_2\text{Ge}$ ), 1.93 (m, 2H,  $\text{C}_8\text{F}_{17}\text{CH}_2\text{CH}_2\text{Ge}$ ), 2.99 (dd,  $J = 12.6, 5.6$  Hz, 4H,  $2 \times \text{GeCH}_2\text{Nap}$ ), 7.21 (dd,  $J = 6.6, 1.8$  Hz, 2H, ArH), 7.42-7.49 (m, 6H, ArH), 7.68 (dd,  $J = 6.6, 1.8$  Hz, 2H, ArH), 7.76 (d,  $J = 8.4$  Hz, 2H,

ArH), 7.81 (dd,  $J = 6.6, 1.8$  Hz, 2H ArH);  $^{13}\text{C}$  NMR (100 MHz;  $\text{CDCl}_3$ )  $\delta$  7.5 (t), 26.4 (t,  $J_{\text{CF}} 23.0$  Hz), 28.3 (2t), 110.2 (s), 110.6 (2s), 110.7 (s), 110.9 (3s), 117.1 (s), 125.4 (2d), 126.3 (2d), 126.4 (2d), 126.9 (2d), 127.1 (2d), 127.7 (2d), 128.5 (2d), 131.7 (2s), 133.6 (2s), 133.7 (2s);  $^{19}\text{F}$  NMR (376 MHz;  $\text{CDCl}_3$ )  $\delta$  -125.2 (s, 2F), -122.6 (s, 2F), -121.8 (s, 2F), -121.0 (m, 6F), -115.0 [quintet,  $J = 15.1$  Hz, 2F,  $(\text{CF}_2)_6\text{CF}_2\text{CF}_3$ ], -79.8 [t,  $J = 9.4$  Hz, 3F,  $(\text{CF}_2)_6\text{CF}_2\text{CF}_3$ ]; IR  $\nu_{\text{max}}$  (neat) 3054 (C-H), 2987 (C-H) 1601 (C=C), 1422 (C-F), 1265, 896, 748  $\text{cm}^{-1}$ ;  $m/z$  (FAB $^+$ ) (rel. intensity) 882 [ $\text{M}^{79}\text{Br}^+$ , 1], 803 (1), 141 (100); HRMS (ESI $^+$ ) calc'd. for  $\text{C}_{32}\text{H}_{23}^{79}\text{BrF}_{17}^{74}\text{Ge}$  ( $\text{MH}^+$ ) 882.9924, found 882.9932,  $\Delta$  1.0 ppm.

**(3,3,4,4,5,5,6,6,7,7,8,8,9,9,10,10,10-Heptadecafluorodecyl)(4-methylphenyl)bis-(naphthalen-2-ylmethyl)germane 1b**

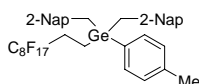

To a solution of *bromo-(3,3,4,4,5,5,6,6,7,7,8,8,9,9,10,10,10-heptadecafluorodecyl)bis-(naphthalen-2-ylmethyl)germane* (0.800 g, 0.955 mmol), in  $\text{Et}_2\text{O}$  (10.0 mL) at 0 °C was added a solution of 4-tolylmagnesiumbromide (4.75 mL, 4.75 mmol, 1.0 M) dropwise. The reaction mixture was stirred at 0 °C for 1 h and then at rt for over 14 h. The resulting solution was diluted with  $\text{Et}_2\text{O}$  (20.0 mL) and a solution of 1.0 M  $\text{NH}_4\text{Cl}$  was added to the reaction mixture until no effervescence occurred. Following extraction with ( $2 \times 20.0$  mL) of  $\text{Et}_2\text{O}$ , the combined organic extracts were dried over  $\text{MgSO}_4$  and evaporated *in vacuo* to give green oily residue which was purified by FC (hexane/ $\text{EtOAc}$ , 97/3) to give 4-tolyl germane **1b** as a brown oil (0.600 g, 71%).  $^1\text{H}$  NMR (400 MHz;  $\text{CDCl}_3$ ):  $\delta$  1.20 (m, 2H,  $\text{CH}_2\text{CH}_2\text{Ge}$ ), 1.89 (m, 2H,  $\text{CH}_2\text{CH}_2\text{Ge}$ ), 2.45 (s, 3H,  $\text{GeC}_6\text{H}_4\text{CH}_3$ ), 2.76 (s, 4H,  $2 \times \text{GeCH}_2\text{Nap}$ ), 7.13 (d, 2H,  $J = 8.4$  Hz, ArH), 7.25 (d, 2H,  $J = 6.8$  Hz, ArH), 7.31 (d, 2H,  $J = 7.6$  Hz, ArH), 7.41–7.50 (m, 6H, ArH), 7.68 (d, 2H,  $J = 7.6$  Hz, ArH), 7.73 (d, 2H,  $J = 8.4$  Hz, ArH), 7.83 (d, 2H,  $J = 7.6$  Hz, ArH);  $^{13}\text{C}$  NMR (100 MHz;  $\text{CDCl}_3$ )  $\delta$  1.9 (t), 21.4 (q), 22.5 (2t), 26.3 (t,  $J_{\text{CF}} 23.4$  Hz), 108.5 (s), 110.2 (s), 110.69 (2s), 110.72 (s), 111.0 (s), 111.1 (s), 118.0 (s), 124.8 (2d), 125.7 (2d), 126.0 (2d), 127.0 (2d), 127.4 (2d), 127.6 (2d), 128.0 (2d), 129.2 (2d), 131.3 (2s), 132.7 (s), 133.8 (2d+s), 136.7 (3s), 139.2 (s);  $^{19}\text{F}$  NMR (376 MHz;  $\text{CDCl}_3$ ):  $\delta$  -126.6 (s, 2F), -123.9 (s, 2F), -123.1 (s, 2F), -122.3 (m, 6F), -116.7 [quintet,  $J = 15$  Hz, 2F,  $(\text{CF}_2)_6\text{CF}_2\text{CF}_3$ ], -81.2 [t,  $J = 10$  Hz, 3F,  $(\text{CF}_2)_6\text{CF}_2\text{CF}_3$ ]; IR  $\nu_{\text{max}}$  (neat) 3024 (C-H), 2980 (C-H) 1598 (C=C), 1507, 1421 (C-F), 1265, 896, 744  $\text{cm}^{-1}$ ;  $m/z$  (EI $^+$ ) (rel. intensity) 894 ( $\text{M}^+$ , 25), 753 (44), 322 (43), 282 (47), 211 (66), 141 (100); HRMS calc'd. for  $\text{C}_{39}\text{H}_{29}^{74}\text{GeF}_{17}$  ( $\text{M}^+$ ) 894.1209, found 894.1244,  $\Delta$  3.8 ppm; Analysis for  $\text{C}_{39}\text{H}_{29}\text{GeF}_{17}$  expected C 52.44%, H 3.27%, found C 52.53%, H 3.36%.

**(3,3,4,4,5,5,6,6,7,7,8,8,9,9,10,10,10-Heptadecafluorodecyl)bis-(naphthalen-2-ylmethyl)phenylgermane 1c**

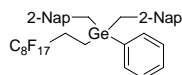

To a solution of *bromo-(3,3,4,4,5,5,6,6,7,7,8,8,9,9,10,10,10-heptadecafluorodecyl)bis-(naphthalen-2-ylmethyl)germane* (0.50 g, 0.567 mmol), in THF (10.0 mL) at 0 °C was added a solution of *phenylmagnesiumbromide* (0.68 mL, 1.7 mmol, 2.5 M) dropwise. The reaction mixture was stirred at 0 °C for 1 h and then at rt for over 14 h. The resulting solution was diluted with  $\text{Et}_2\text{O}$  (20.0 mL) and a solution of 1.0 M  $\text{NH}_4\text{Cl}$  was added to the reaction mixture until no effervescence occurred. Following extraction with ( $2 \times 20.0$

mL) of Et<sub>2</sub>O, the combined organic extracts were dried over MgSO<sub>4</sub> and evaporated *in vacuo* to give green oily residue which was purified by FC (hexane/EtOAc, 97/3) to give phenylgermane **1c** as a pale yellow oil (0.4122 g, 83%). <sup>1</sup>H NMR (400 MHz; CDCl<sub>3</sub>): δ 1.19 (m, 2H, CH<sub>2</sub>CH<sub>2</sub>Ge), 1.89 (m, 2H, CH<sub>2</sub>CH<sub>2</sub>Ge), 2.76 (s, 4H, 2 × GeCH<sub>2</sub>Nap), 7.09 (dd, *J* = 8.4, 1.2 Hz, 2H, ArH), 7.73–7.49 (m, 11H, ArH), 7.65 (d, *J* = 7.4 Hz, 2H, ArH), 7.71 (d, *J* = 8.4 Hz, 2H, ArH), 7.81 (d, *J* = 7.4 Hz, 2H, ArH); <sup>13</sup>C NMR (100 MHz; CDCl<sub>3</sub>) δ 1.9 (t), 22.5 (2t), 26.3 (t, *J*<sub>CF</sub> 23.4 Hz), 108.3 (s), 110.2 (2s), 110.7 (2s), 111.0 (2s), 111.1 (s), 118.0 (s), 124.8 (2d), 125.7 (2d), 126.1 (2d), 127.0 (2d+s), 127.4 (2d), 127.6 (2d), 128.1 (2d), 128.4 (2d), 129.3 (d), 131.3 (2s), 133.7 (2s), 133.8 (2d), 136.5 (2s); <sup>19</sup>F NMR (376 MHz; CDCl<sub>3</sub>): δ -125.2 (s, 2F), -122.6 (s, 2F), -121.8 (s, 2F), -121.0 (m, 6F), -115.4 [quintet, *J* = 14.7 Hz, 2F, (CF<sub>2</sub>)<sub>6</sub>CF<sub>2</sub>CF<sub>3</sub>], -79.8 [t, *J* = 9.7 Hz, 3F, (CF<sub>2</sub>)<sub>6</sub>CF<sub>2</sub>CF<sub>3</sub>]; IR ν<sub>max</sub> (neat) 3032 (C-H), 2985 (C-H) 1598 (C=C), 1415 (C-F), 1265, 896, 749 cm<sup>-1</sup>; *m/z* (FAB<sup>+</sup>) (rel. intensity) 739 [(M-NapCH<sub>2</sub>)<sup>+</sup>, 2], 459 (1), 141 (100); HRMS (FAB<sup>+</sup>) calc'd. for C<sub>27</sub>H<sub>19</sub>F<sub>17</sub><sup>74</sup>Ge [(M-NapCH<sub>2</sub>)<sup>+</sup>] 739.0845, found 739.0870, Δ 3.4 ppm.

**(3,3,4,4,5,5,6,6,7,7,8,8,9,9,10,10,10-Heptadecafluorodecyl)(4-chlorophenyl)bis-(naphthalen-2-ylmethyl)germane **1d****

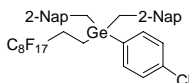

To a solution of 4-chloro-1-bromoene (0.4038 g, 2.10 mmol) in THF (10.0 mL) at -78 °C was added <sup>t</sup>BuLi (3.3 mL, 4.62 mmol, 1.4M) dropwise resulting in a yellow solution. The solution was stirred at -78 °C for 30 min to achieve lithium-halogen exchange. The resulting solution mixture was added bromo-(3,3,4,4,5,5,6,6,7,7,8,8,9,9,10,10,10-heptadecafluorodecyl)bis-(naphthalen-2-ylmethyl)germane (0.62 g, 0.756 mmol) at -78 °C and stirred for 1 h than warmed up to rt for 16 h. The reaction mixture was diluted with Et<sub>2</sub>O (20.0 mL) and a solution of 1.0 M NH<sub>4</sub>Cl was added to the reaction mixture until no effervescence occurred. Following extraction with (2 × 20.0 mL) of Et<sub>2</sub>O, the combined organic extracts were dried over MgSO<sub>4</sub> and evaporated *in vacuo* to give green oily residue which was purified by FC (hexane/EtOAc, 97/3) to give (4-chlorophenyl)germane **1d** as a pale yellow oil (0.5168 g, 80%). <sup>1</sup>H NMR (400 MHz; CDCl<sub>3</sub>): δ 1.20 (m, 2H, CH<sub>2</sub>CH<sub>2</sub>Ge), 1.84 (m, 2H, CH<sub>2</sub>CH<sub>2</sub>Ge), 2.74 (s, 4H, 2 × GeCH<sub>2</sub>Nap), 7.07 (dd, *J* = 6.7, 1.7 Hz, 2H, ArH), 7.25 (d, *J* = 8.2 Hz, 2H, ArH), 7.36 (d, *J* = 7.7 Hz, 2H, ArH), 7.42–7.49 (m, 6H, ArH), 7.66 (d, *J* = 7.7 Hz, 2H, ArH), 7.71 (d, *J* = 8.2 Hz, 2H, ArH), 7.81 (d, *J* = 7.7 Hz, 2H, ArH); <sup>13</sup>C NMR (100 MHz; CDCl<sub>3</sub>) δ 1.8 (t), 22.4 (2t), 26.2 (t, *J*<sub>CF</sub> 23.5 Hz), 108.3 (s), 110.2 (s), 110.7 (3s), 110.97 (s), 111.01 (s), 117.9 (s), 125.0 (2d), 125.7 (2d), 126.2 (2d), 127.0 (2d), 127.2 (2d), 127.6 (2d), 128.2 (2d), 128.6 (2d), 131.3 (2s), 133.7 (2s), 134.7 (s), 135.1 (2d), 135.7 (s), 136.1 (2s); <sup>19</sup>F NMR (376 MHz; CDCl<sub>3</sub>): δ -125.2 (s, 2F), -122.5 (s, 2F), -121.8 (s, 2F), -121.0 (m, 6F), -115.4 [quintet, *J* = 15 Hz, 2F, (CF<sub>2</sub>)<sub>6</sub>CF<sub>2</sub>CF<sub>3</sub>], -79.8 [t, *J* = 10 Hz, 3F, (CF<sub>2</sub>)<sub>6</sub>CF<sub>2</sub>CF<sub>3</sub>]; IR ν<sub>max</sub> (neat) 3048 (C-H), 2980 (C-H) 1596 (C=C), 1405 (C-F), 1264, 1090 (C-Cl), 895, 749 cm<sup>-1</sup>; *m/z* (FAB<sup>+</sup>) (rel. intensity) 773 {[M(<sup>35</sup>Cl)-NapCH<sub>2</sub>]<sup>+</sup>, 1}, 429 (1), 401 (2), 141 (100); HRMS (FAB<sup>+</sup>) calc'd. for C<sub>27</sub>H<sub>17</sub><sup>35</sup>ClF<sub>17</sub><sup>74</sup>Ge [M-(NapCH<sub>2</sub>)<sup>+</sup>] 772.9954, found 772.9952, Δ -0.2 ppm.

**(3,3,4,4,5,5,6,6,7,7,8,8,9,9,10,10,10-Heptadecafluorodecyl)bisanaphthalen-2-yl-(2-methoxyphenyl)germane **1e****

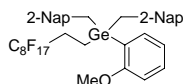

To a solution of *2-methoxy-1-bromobenzene* (0.3324 g, 1.78 mmol) in THF (10.0 mL) at  $-78\text{ }^{\circ}\text{C}$  was added  $t\text{-BuLi}$  (2.6 mL, 3.64 mmol, 1.4M) dropwise resulting in a yellow solution. The solution was stirred at  $-78\text{ }^{\circ}\text{C}$  for 30 min to achieve lithium-halogen exchange. The resulting solution mixture was added *bromo-(3,3,4,4,5,5,6,6,7,7,8,8,9,9,10,10,10-heptadecafluorodecyl)bis-(naphthalen-2-ylmethyl)germane* (0.5234 g, 0.593 mmol) at  $-78\text{ }^{\circ}\text{C}$  and stirred for 1 h then warmed up to rt for 16 h. The reaction mixture was diluted with  $\text{Et}_2\text{O}$  (20.0 mL) and a solution of 1.0 M  $\text{NH}_4\text{Cl}$  was added to the reaction mixture until no effervescence occurred. Following extraction with ( $2 \times 20.0$  mL) of  $\text{Et}_2\text{O}$ , the combined organic extracts were dried over  $\text{MgSO}_4$  and evaporated *in vacuo* to give green oily residue which was purified by FC (hexane/ $\text{EtOAc}$ , 95/5) to give *(2-methoxyphenyl)germane 1e* as a pale yellow oil (0.4706 g, 87%);  $^1\text{H}$  NMR (400 MHz;  $\text{CDCl}_3$ ):  $\delta$  1.19 (m, 2H,  $\text{CH}_2\text{CH}_2\text{Ge}$ ), 1.89 (m, 2H,  $\text{CH}_2\text{CH}_2\text{Ge}$ ), 2.78 (s, 4H,  $2 \times \text{GeCH}_2\text{Nap}$ ), 3.69 (s, 3H,  $\text{OCH}_3$ ), 6.89 (d,  $J = 8.4$  Hz, 1H, ArH), 7.02 (t,  $J = 7.2$  Hz, 1H, ArH), 7.10 (d,  $J = 8.4$  Hz, 2H, ArH), 7.34-7.39 (m, 3H, ArH), 7.40-7.46 (m, 5H, ArH), 7.62 (d,  $J = 8.0$  Hz, 2H, ArH), 7.68 (d,  $J = 8.4$  Hz, 2H, ArH), 7.79 (d,  $J = 7.7$  Hz, 2H, ArH);  $^{13}\text{C}$  NMR (100 MHz;  $\text{CDCl}_3$ )  $\delta$  2.7 (t), 22.7 (2t), 26.6 (t,  $J_{\text{CF}}$  23.2 Hz), 54.7 (q), 108.4 (s), 110.2 (s), 110.7 (2s), 109.6 (2d), 111.0 (2s), 111.1 (s), 118.2 (s), 121.0 (2d), 124.5 (s), 124.6 (2d), 125.7 (2d), 125.9 (2d), 127.0 (2d), 127.5 (2d+s), 127.8 (2d), 131.1 (d), 131.2 (s), 133.7 (2s), 134.9 (d), 137.3 (2s), 162.8 (s);  $^{19}\text{F}$  NMR (376 MHz;  $\text{CDCl}_3$ ):  $\delta$  -125.1 (s, 2F), -122.6 (s, 2F), -121.8 (s, 2F), -121.0 (m, 6F), -115.3 [quintet,  $J = 14.7$  Hz, 2F,  $(\text{CF}_2)_6\text{CF}_2\text{CF}_3$ ], -79.8 [t,  $J = 9.8$  Hz, 3F,  $(\text{CF}_2)_6\text{CF}_2\text{CF}_3$ ]; IR  $\nu_{\text{max}}$  (neat) 3032 (C-H), 2980 (C-H) 1595 (C=C), 1507, 1412 (C-F), 1265, 896, 748  $\text{cm}^{-1}$ ;  $m/z$  ( $\text{FAB}^+$ ) (rel. intensity) 769 [(M-Nap $\text{CH}_2$ ) $^+$ , 1], 463 (1), 341 (5), 141 (100); HRMS ( $\text{FAB}^+$ ) calc'd. for  $\text{C}_{28}\text{H}_{20}\text{F}_{17}\text{O}^{70}\text{Ge}$  [M-(Nap $\text{CH}_2$ ) $^+$ ] 765.0480, found 765.0480,  $\Delta$  0.0 ppm.

**(3,3,4,4,5,5,6,6,7,7,8,8,9,9,10,10,10-Heptadecafluorodecyl)(4-trifluoromethylphenyl)bis-(naphthalen-2-ylmethyl)germane 1f**

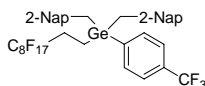

To oven dried magnesium turnings (0.032 g, 1.34 mmol) in THF (33.0 mL) was added *4-trifluoromethylbromobenzene* (1.23 g, 1.23 mL, 1.34 mmol) and the reaction mixture was stirred for 2 h to initiate Grignard reagent formation. To the resulting orange coloured reaction mixture was added a solution of *bromo-(3,3,4,4,5,5,6,6,7,7,8,8,9,9,10,10,10-heptadecafluorodecyl)bis-(naphthalen-2-ylmethyl)germane* (0.500 g, 0.600 mmol) in THF (2.00 mL) dropwise and the reaction mixture was stirred for 4 h. A sat. solution of  $\text{NH}_4\text{Cl}$  was added to the reaction mixture until no effervescence occurred and the reaction mixture was partitioned between  $\text{Et}_2\text{O}$  (40.0 mL) and water (10.0 mL), extracted with  $\text{CH}_2\text{Cl}_2$  ( $2 \times 10.0$  mL) and dried over  $\text{MgSO}_4$ . Purification by FC (petrol  $\rightarrow$  petrol/ $\text{EtOAc}$ , 95/5) gave *(4-trifluoromethylphenyl)germane 1f* as a colourless oil (0.474 g, 84%).  $R_f$  0.31 (petrol/  $\text{EtOAc}$ , 95/5);  $^1\text{H}$  NMR (400 MHz;  $\text{CDCl}_3$ ):  $\delta$  1.21 (m, 2H,  $\text{CH}_2\text{CH}_2\text{Ge}$ ), 1.83 (m, 2H,  $\text{CH}_2\text{CH}_2\text{Ge}$ ), 2.76 (s, 4H,  $2 \times \text{GeCH}_2\text{Nap}$ ), 7.06 (dd,  $J = 6.6, 1.8$  Hz, 2H, ArH), 7.35 (s, 2H, ArH), 7.40-7.48 (m, 6H, ArH), 7.61 (t,  $J = 8.7$  Hz, 4H, ArH), 7.70 (d,  $J = 8.4$  Hz, 2H, ArH), 7.79 (d,  $J = 7.5$  Hz, 2H, ArH);  $^{13}\text{C}$  NMR (101 MHz;  $\text{CDCl}_3$ )  $\delta$  1.9 (t), 22.4 (2t), 26.2 (t), 108.4 (s), 110.2 (s), 110.64 (2s), 110.67 (s), 110.95 (s), 110.99 (s), 117.9 (s), 124.77 (s), 124.81 (2d), 125.0 (2d), 125.8 (2d), 126.2 (2d), 127.0 (2d), 127.1 (2d), 127.6 (2d), 128.2 (2d), 131.3 (2s), 133.7 (2s), 134.2 (2d), 135.8 (3s);  $^{19}\text{F}$  NMR (376 MHz;  $\text{CDCl}_3$ ):  $\delta$  -125.2 (s, 2F), -122.6 (s, 2F), -121.8 (s, 2F), -121.0 (m, 6F), -115.4 [quintet,  $J = 15.1$  Hz, 2F,  $(\text{CF}_2)_6\text{CF}_2\text{CF}_3$ ], -79.8 [t,  $J = 10.0$  Hz, 3F,  $(\text{CF}_2)_6\text{CF}_2\text{CF}_3$ ], -62.0 (s, 3F,  $\text{ArCF}_3$ ); IR  $\nu_{\text{max}}$  (neat) 3020 (C-H), 2985 (C-H) 1593 (C=C), 1421 (C-F),

1265, 897, 740  $\text{cm}^{-1}$ ;  $m/z$  ( $\text{EI}^+$ ) (rel. intensity) 948 ( $\text{M}^+$ , 55), 807 (71), 787 (16), 769 (20), 549 (23), 141 (100); HRMS ( $\text{EI}^+$ ) calc'd. for  $\text{C}_{39}\text{H}_{26}^{74}\text{GeF}_{20}$  ( $\text{M}^+$ ) 948.0927, found 948.0962,  $\Delta$  3.7 ppm; Analysis for  $\text{C}_{39}\text{H}_{29}\text{GeF}_{20}$  expected C 50.49%, H 3.10%, found C 50.54%, H 2.99%.

**Photoactivation/cross-coupling reactions (Table 1):**

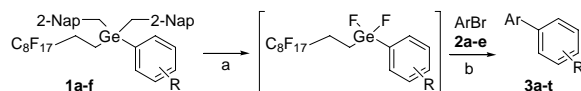

*General method for photoactivation*

To a solution of the *arylgermane* (0.076 mmol) in MeCN/MeOH (3/1 v/v, 20 mL) in a Pyrex Schlenk tube (1 mm thick) was added powdered  $\text{Cu}(\text{BF}_4)_2 \cdot n\text{H}_2\text{O}$  (0.084 g). The resulting mixture was purged with argon for 30 min before irradiating using a 125 W high pressure Hg lamp for 1 h. A further portion of powdered  $\text{Cu}(\text{BF}_4)_2 \cdot n\text{H}_2\text{O}$  (0.084 g) was then added and the solution irradiated for a further 1 h. After this time, the solvent was removed *in vacuo*, the residue was taken up in  $\text{CH}_2\text{Cl}_2$  (20.0 mL), washed with water ( $2 \times 8.00$  mL) and dried over  $\text{MgSO}_4$  to give the crude *difluoroarylgermane*.

The progress of the photolysis can be conveniently monitored by  $^{19}\text{F}$  NMR. For example, for the photolysis of arylgermane **1a**:

The  $^{19}\text{F}$  NMR after <2 h displays a singlet at  $\delta_{\text{F}}$  -202.4 ppm which corresponds to the mono-germyl fluoride *{(3,3,4,4,5,5,6,6,7,7,8,8,9,9,10,10,10-heptafluorodecyl)(4-methoxyphenyl)(naphthalen-2-ylmethyl)germyl fluoride}*:  $R_{\text{f}}$  0.40 ( $\text{CH}_2\text{Cl}_2$ );  $^1\text{H}$  NMR (400 MHz;  $\text{CDCl}_3$ ):  $\delta$  1.43 (m, 2H,  $\text{CH}_2\text{CH}_2\text{Ge}$ ), 2.11 (m, 2H,  $\text{CH}_2\text{CH}_2\text{Ge}$ ), 3.03 (m, 2H,  $\text{GeCH}_2\text{Nap}$ ), 3.84 (s, 3H,  $\text{OCH}_3$ ), 6.99 (d,  $J = 6.7$  Hz, 2H, ArH), 7.26 (d,  $J = 6.7$  Hz, 1H, ArH), 7.40 (d,  $J = 6.7$  Hz, 2H, ArH), 7.40-7.52 (m, 2H, ArH), 7.59 (s, 1H, ArH), 7.72-7.85 (m, 3H, ArH);  $^{13}\text{C}$  NMR (100 MHz;  $\text{CDCl}_3$ )  $\delta$  6.1 (t), 25.1 (t), 26.3 (t), 55.1 (q), 108.7 (s), 110.6 (s), 111.1 (s), 111.1 (s), 111.4 (3s), 114.5 (2d), 118.4 (s), 125.1 (d), 126.27 (d), 126.31 (d), 127.1 (2d), 127.6 (d), 128.5 (d), 131.6 (s), 133.1 (s), 133.7 (s), 134.3 (2d), 161.7 (s), 1  $\times$  (s) carbon signal absent;  $^{19}\text{F}$  NMR (376 MHz;  $\text{CDCl}_3$ ):  $\delta$  -202.4 (s, GeF), -125.2 (s, 2F), -122.5 (s, 2F), -121.8 (s, 2F), -120.9 (m, 6F), -115.3 [quintet,  $J = 14.8$  Hz, 2F,  $(\text{CF}_2)_6\text{CF}_2\text{CF}_3$ ], -79.8 (t,  $J = 10.0$  Hz, 3F,  $(\text{CF}_2)_6\text{CF}_2\text{CF}_3$ );  $m/z$  ( $\text{EI}^+$ ) (rel. intensity) 788 ( $\text{M}^+$ , 1), 530 (70), 281 (70), 57 (100).}

After 2 h the peak for this mono-germyl fluoride has disappeared and the  $^{19}\text{F}$  NMR displays three singlets at  $\delta_{\text{F}}$  -163.6, -164.1 and -165.3 ppm which correspond to the difluorogermane and/or a derivative thereof *{ $m/z$  ( $\text{EI}^+$ ) (rel. intensity) 666 ( $\text{M}^+$ , 1), 410 (25), 328 (30), 149 (60), 57 (100); HRMS ( $\text{EI}^+$ ) calc'd. for  $\text{C}_{17}\text{H}_{11}^{74}\text{GeF}_{19}\text{O}$  ( $\text{M}^+$ ) 665.9718, found 665.9701,  $\Delta$  2.7 ppm.}*

The by-product of the photooxidation, *2-naphthylmethyl methyl ether*, shows the following diagnostic  $^1\text{H}$  NMR signals:  $^1\text{H}$  NMR (400 MHz;  $\text{CDCl}_3$ ):  $\delta$  3.41 (s, 3H, OMe), 4.62 (s, 2H,  $\text{ArCH}_2$ ), 7.40-7.48 (m, 3H, ArH), 7.75-7.83 (m, 4H, ArH).

If the solution has not been efficiently deoxygenated, some *2-naphthaldehyde* forms and shows the following diagnostic  $^1\text{H}$  NMR signals:  $^1\text{H}$  NMR (400 MHz;  $\text{CDCl}_3$ ):  $\delta$  7.55-7.63 (m, 2H, ArH), 7.88-7.96 (m, 4H, ArH), 8.35 (s, 1H, ArH), 10.22 (s, 1H,  $\text{ArCHO}$ );  $m/z$  ( $\text{EI}^+$ ) (rel. intensity) 156 ( $\text{M}^+$ , 100), 127 (90), 91 (20), 58 (50).

*Typical method for cross-coupling of crude photoactivated germane*



**Entry 1: 4-Methoxy-3',5'-bis(trifluoromethyl)biphenyl 3a<sup>3</sup>**

The crude difluoroarylgermane from the photolysis of *arylgermane 1a* (31.1 mg, 0.047 mmol) and TBAF (44.2 mg, 0.14 mmol) was dissolved in degassed DMF (2 mL) and stirred for 30 min. PdCl<sub>2</sub>(MeCN)<sub>2</sub> (1.2 mg, 0.0046 mmol) and P(2-Tol)<sub>3</sub> (2.2 mg, 0.007 mmol) were dissolved in degassed DMF (1 mL) for 30 min to form the active catalytic species. The catalyst solution was added to the difluoroarylgermane solution followed by adding 3,5-bis(trifluoromethyl)bromobenzene (27.2 mg, 0.093 mmol, 16  $\mu$ L) and CuI (9.3 mg, 0.047 mmol). The resulting mixture was heated at 120 °C for 16 h under nitrogen atmosphere. The crude reaction mixture was diluted with Et<sub>2</sub>O (20.0 mL) and washed with water (3  $\times$  10.0 mL), the combined organic extracts were dried over MgSO<sub>4</sub> and evaporated *in vacuo*. Purification by FC (hexane/EtOAc, 97/3) gave *biphenyl 3a* as a clear liquid (14.0 mg, 96%). R<sub>f</sub> 0.22 (cyclohexane); <sup>1</sup>H NMR (400 MHz; CDCl<sub>3</sub>):  $\delta$  3.88 (s, 3H, OCH<sub>3</sub>), 7.03 (d, *J* = 8.8 Hz, 2H, ArH), 7.55 (d, *J* = 8.8 Hz, 2H, ArH), 7.81 (s, 1H, ArH), 7.91 (s, 2H, ArH). <sup>19</sup>F NMR (376 MHz; CDCl<sub>3</sub>):  $\delta$  -62.8 (s, 6F, 2  $\times$  CF<sub>3</sub>). <sup>13</sup>C NMR (CDCl<sub>3</sub>, 67 MHz)  $\delta$  55.4 (q), 114.7 (d), 120.2 (d), 126.6 (d), 128.4 (d), 5 quaternary carbons not seen; IR  $\nu_{\max}$  (neat) 2940, 2842, 1610, 1521, 1383, 1279, 1185, 1132, 1061, 830, 682 cm<sup>-1</sup>; *m/z* (EI) (rel. intensity) 320 (M<sup>+</sup>, 100), 305 (16), 301 (20), 277 (60), 251 (9), 188 (13); HRMS calc'd for C<sub>15</sub>H<sub>10</sub>F<sub>6</sub>O 320.0636, found 320.0625,  $\Delta$  3.4 ppm.

**Entry 2: 4-Chloro-4'-methoxybiphenyl 3b<sup>4</sup>**

Using the *typical method*, the crude difluoroarylgermane from the photolysis of *arylgermane 1a* (48.3 mg, 0.07 mmol), TBAF (66.6 mg, 0.211 mmol), PdCl<sub>2</sub>(MeCN)<sub>2</sub> (1.8 mg, 0.007 mmol), P(2-Tol)<sub>3</sub> (3.2 mg, 0.0105 mmol), 4-chlorobromobenzene (27 mg, 0.141 mmol) and CuI (14 mg, 0.07 mmol) were employed. Purification by FC (hexane/EtOAc, 97/3) gave *biphenyl 3b* as a colourless oil (13.1 mg, 85%). <sup>1</sup>H NMR (400 MHz; CDCl<sub>3</sub>):  $\delta$  3.85 (s, 3H, OCH<sub>3</sub>), 6.96-6.99 (m, 2H, ArH), 7.37-7.39 (m, 2H, ArH), 7.46-7.51 (m, 4H, ArH); <sup>13</sup>C NMR (100 MHz; CDCl<sub>3</sub>)  $\delta$  55.3 (q), 114.3 (2d), 127.9 (2d), 128.0 (2d), 128.8 (2d), 132.4 (s), 132.6 (s), 139.2 (s), 159.2 (s); *m/z* (EI<sup>+</sup>) (rel. intensity) 218 (M<sup>+</sup>, 100), 203 (40), 175 (30); HRMS (EI<sup>+</sup>) calc'd. for C<sub>13</sub>H<sub>11</sub><sup>35</sup>ClO (M<sup>+</sup>) 218.0498, found 218.0499,  $\Delta$  0.3 ppm.

**Entry 3: 4-Methoxy-4'-(phenylmethoxy)biphenyl 3c**

Using the *typical method*, the crude difluoroarylgermane from the photolysis of *arylgermane 1a* (48.3 mg, 0.07 mmol), TBAF (66.6 mg, 0.211 mmol), PdCl<sub>2</sub>(MeCN)<sub>2</sub> (1.8 mg, 0.007 mmol), P(2-Tol)<sub>3</sub> (3.2 mg, 0.0105 mmol), 4-(phenylmethoxy)bromobenzene (34.8 mg, 0.141 mmol) and CuI (14 mg, 0.07 mmol) were employed. Purification by FC (hexane/EtOAc, 97/3) gave *biphenyl 3c* as a colourless oil (12.5 mg, 65%). <sup>1</sup>H NMR (400 MHz; CDCl<sub>3</sub>):  $\delta$  3.85 (s, 3H, OCH<sub>3</sub>), 5.11 (s, 2H, ArOCH<sub>2</sub>Ph), 6.97 (d, *J* = 8.6 Hz, 2H, ArH), 7.04 (d, *J* = 8.6 Hz, 2H, ArH), 7.32-7.36 (m, 1H, ArH), 7.41 (t, *J* = 7.4 Hz, 2H, ArH), 7.46-7.50 (m, 6H, ArH); <sup>13</sup>C NMR (100 MHz; CDCl<sub>3</sub>)  $\delta$  55.3 (q), 70.1 (t), 114.2 (d), 115.1 (3d), 127.5 (2d), 127.8 (4d), 128.0 (d), 128.6 (2d), 133.4 (s), 133.7 (s), 137.0 (s), 157.9 (s), 158.7 (s); IR  $\nu_{\max}$  (neat) 3027 (C-H), 2988 (C-H), 1567 (C=C), 980, 870 cm<sup>-1</sup>; *m/z* (EI<sup>+</sup>) (rel. intensity) 290 (M<sup>+</sup>, 60), 199 (100), 149 (35), 91 (60); HRMS (EI<sup>+</sup>) calc'd. for C<sub>20</sub>H<sub>18</sub>O<sub>2</sub> (M<sup>+</sup>) 290.1307, found 290.1303,  $\Delta$  -1.3 ppm.

**Entry 4: 1-(4-Methoxyphenyl)naphthalene 3d<sup>5,6</sup>**

Using the *typical method*, the crude difluoroarylgermane from the photolysis of *arylgermane 1a* (48.3 mg, 0.07 mmol), TBAF (66.6 mg, 0.211 mmol), PdCl<sub>2</sub>(MeCN)<sub>2</sub> (1.8 mg, 0.007 mmol), P(2-Tol)<sub>3</sub> (3.2 mg, 0.0105 mmol), *1-bromonaphthalene* (29.8 mg, 0.143 mmol, 20 μL) and CuI (40.1 mg, 0.201 mmol) were employed. Purification by FC (hexane/EtOAc, 97/3) gave *1-(4-methoxyphenyl)naphthalene 3d* as white plates (12.4 mg, 75%). R<sub>f</sub> 0.16 (cyclohexane); mp. 110.4-116.2 °C (*cf.* 114-115 °C<sup>7</sup>). <sup>1</sup>H NMR (400 MHz; CDCl<sub>3</sub>): δ 3.90 (s, 3H, OCH<sub>3</sub>), 7.04 (d, *J* = 8.6 Hz, 2H, ArH), 7.40-7.46 (m, 4H, ArH), 7.47-7.54 (m, 2H, ArH), 7.84 (d, *J* = 8.2 Hz, 1H, ArH), 7.92 (d, *J* = 9.2 Hz, 2H, ArH); <sup>13</sup>C NMR (100 MHz; CDCl<sub>3</sub>) δ 55.3 (q), 113.7 (2d), 125.4 (d), 125.7 (d), 125.9 (d), 126.0 (d), 126.9 (d), 127.3 (d), 128.2 (d), 131.1 (2d), 131.8 (s), 133.1 (s), 133.8 (s), 139.9 (s), 158.9 (s); *m/z* (EI<sup>+</sup>) (rel. intensity) 234 (M<sup>+</sup>, 100%), 219 (38), 203 (14), 189 (55), 163 (9), 101 (23), 95 (29); HRMS (EI<sup>+</sup>) calc'd. for C<sub>17</sub>H<sub>14</sub>O (M<sup>+</sup>) 234.1045, found 234.1041, Δ -1.6 ppm.

**Entry 5: 4-Methyl-3',5'-bis-(trifluoromethyl)biphenyl 3e<sup>8,9</sup>**

Using the *typical method*, the crude difluoroarylgermane from the photolysis of *arylgermane 1b* (55.2 mg, 0.085 mmol), TBAF (80.0 mg, 0.254 mmol), PdCl<sub>2</sub>(MeCN)<sub>2</sub> (2.2 mg, 0.0085 mmol), P(2-Tol)<sub>3</sub> (3.9 mg, 0.0128 mmol), *3,5-bis-(trifluoromethyl)bromobenzene* (49.8 mg, 0.17 mmol, 29.3 μL) and CuI (17.5 mg, 0.088 mmol) were employed. Purification by FC (hexane/EtOAc, 97/3) gave *biphenyl 3e* as a colourless oil (21.8 mg, 84%). R<sub>f</sub> 0.65 (cyclohexane); <sup>1</sup>H NMR (400 MHz; CDCl<sub>3</sub>): δ 2.43 (s, 3H, ArCH<sub>3</sub>), 7.31 (d, *J* = 8.0 Hz, 2H, ArH), 7.51 (d, *J* = 8.0 Hz, 2H, ArH), 7.82 (s, 1H, ArH), 7.99 (s, 2H, ArH); <sup>13</sup>C NMR (100 MHz; CDCl<sub>3</sub>) δ 21.2 (q), 120.6 (2s), 122.1 (d), 126.9 (2d), 127.0 (2d), 130.0 (2d), 131.8 (s), 132.2 (s), 135.3 (s), 139.0 (s), 143.2 (s); *m/z* (EI<sup>+</sup>) (rel. intensity) 304 (M<sup>+</sup>, 91), 285 (19), 235 (66), 215 (39), 165 (100), 91 (66), 69 (25); HRMS (EI<sup>+</sup>) calc'd. for C<sub>15</sub>H<sub>10</sub>F<sub>6</sub> (M<sup>+</sup>) 304.0687, found 304.0681, Δ -1.9 ppm.

**Entry 6: 4-Chloro-4'-methylbiphenyl 3f<sup>10</sup>**

Using the *typical method*, the crude difluoroarylgermane from the photolysis of *arylgermane 1b* (55.2 mg, 0.085 mmol), TBAF (80.0 mg, 0.254 mmol), PdCl<sub>2</sub>(MeCN)<sub>2</sub> (2.2 mg, 0.0085 mmol), P(2-Tol)<sub>3</sub> (3.9 mg, 0.0128 mmol), *4-chloro-bromobenzene* (32.6 mg, 0.170 mmol) and CuI (17.5 mg, 0.088 mmol) were employed. Purification by FC (hexane/EtOAc, 97/3) gave *biphenyl 3f* as a colourless oil (11.9 mg, 69 %). <sup>1</sup>H NMR (400 MHz; CDCl<sub>3</sub>): δ 2.40 (s, 3H, ArCH<sub>3</sub>), 7.24 (s, 1H, ArH), 7.37-7.40 (m, 2H, ArH), 7.41-7.48 (m, 3H, ArH), 7.49-7.52 (m, 2H, ArH); <sup>13</sup>C NMR (100 MHz; CDCl<sub>3</sub>) δ 21.1 (q), 126.8 (2d), 128.17 (2d), 128.21 (d), 128.8 (d), 129.0 (d), 129.6 (d), 133.0 (s), 137.1 (s), 137.4 (s), 139.6 (s); *m/z* (EI<sup>+</sup>) (rel. intensity) 202 [M(<sup>35</sup>Cl)]<sup>+</sup>, 100), 165 (65), 82 (40); HRMS (EI<sup>+</sup>) calc'd. for C<sub>13</sub>H<sub>11</sub><sup>35</sup>Cl (M<sup>+</sup>) 202.0549, found 202.0557, Δ 3.8 ppm.

**Entry 7: 4-Methyl-4'-(phenylmethoxy)biphenyl 3g**

Using the *typical method*, the crude difluoroarylgermane from the photolysis of *arylgermane 1b* (55.2 mg, 0.085 mmol), TBAF (80.0 mg, 0.254 mmol), PdCl<sub>2</sub>(MeCN)<sub>2</sub> (2.2 mg, 0.0085 mmol), P(2-Tol)<sub>3</sub> (3.9 mg, 0.0128 mmol), *4-(phenylmethoxy)bromobenzene* (44.8 mg, 0.17 mmol) and CuI (17.5 mg, 0.088 mmol) were employed. Purification by FC (hexane/EtOAc, 97/3) gave *biphenyl 3g* as a colourless oil (11.2 mg, 48 %). <sup>1</sup>H NMR (400 MHz; CDCl<sub>3</sub>): δ 2.38 (s, 3H, ArCH<sub>3</sub>), 5.11 (s, 2H, ArOCH<sub>2</sub>Ph), 7.04 (d, *J* = 8.7 Hz, 2H, ArH), 7.22 (d, *J* = 8.0 Hz, 2H, ArH), 7.30-7.36 (m, 1H, ArH), 7.38-7.42 (m, 2H, ArH), 7.43-7.47 (m, 4H, ArH), 7.51 (d, *J* = 8.7 Hz, 2H, ArH); <sup>13</sup>C NMR (100 MHz; CDCl<sub>3</sub>) δ 21.1 (q), 70.1 (t), 115.1 (2d), 126.6 (2d), 127.5 (2d), 128.0 (3d), 128.6

Supplementary Material (ESI) for Chemical Communications  
This journal is (c) The Royal Society of Chemistry 2007

(2d), 129.4 (2d), 134.0 (s), 136.4 (s), 137.0 (s), 137.9 (s), 158.1 (s); IR  $\nu_{\max}$  (neat) 3026 (C-H), 2852 (C-H) 1532 (C=C), 900, 750, 670  $\text{cm}^{-1}$ ;  $m/z$  ( $\text{EI}^+$ ) (rel. intensity) 274 ( $\text{M}^+$ , 30), 183 (20), 141 (25), 91 (100); HRMS ( $\text{EI}^+$ ) calc'd. for ( $\text{M}^+$ )  $\text{C}_{20}\text{H}_{18}\text{O}$  274.1358, found 274.1359,  $\Delta$  0.5 ppm.

**Entry 8: 1-(4-Methylphenyl)naphthalene 3h**<sup>11</sup>

Using the *typical method*, the crude difluoroarylgermane from the photolysis of *arylgermane 1b* (55.2 mg, 0.085 mmol), TBAF (80.0 mg, 0.254 mmol),  $\text{PdCl}_2(\text{MeCN})_2$  (2.2 mg, 0.0085 mmol),  $\text{P}(2\text{-Tol})_3$  (3.9 mg, 0.0128 mmol), *1-bromonaphthalene* (35.4 mg, 0.171 mmol, 23.8  $\mu\text{L}$ ) and CuI (37.1 mg, 0.186 mmol) were employed. Purification by FC (hexane/EtOAc, 97/3) gave *1-(4-methylphenyl)naphthalene 3h* as white plates (13.2 mg, 71 %).  $^1\text{H}$  NMR (400 MHz;  $\text{CDCl}_3$ ):  $\delta$  2.47 (s, 3H,  $\text{ArCH}_3$ ), 7.32 (d,  $J = 7.9$  Hz, 2H, ArH), 7.40-7.48 (m, 4H, ArH), 7.49-7.55 (m, 2H, ArH), 7.86 (d,  $J = 8.2$  Hz, 1H, ArH), 7.93 (t,  $J = 9.1$  Hz), 2H, ArH);  $^{13}\text{C}$  NMR (100 MHz;  $\text{CDCl}_3$ )  $\delta$  21.2 (q), 125.4 (d), 125.7 (d), 125.9 (d), 126.1 (d), 126.9 (d), 127.4 (d), 128.2 (d), 129.0 (2d), 129.3 (2d), 131.7 (s), 133.8 (s), 136.9 (s), 137.8 (s), 140.2 (s);  $m/z$  ( $\text{EI}^+$ ) (rel. intensity) 218 ( $\text{M}^+$ , 100), 203 (970), 202 (85), 108 (50); HRMS ( $\text{EI}^+$ ) calc'd. for  $\text{C}_{17}\text{H}_{14}$  ( $\text{M}^+$ ) 218.1096, found 218.1098,  $\Delta$  1.1 ppm.

**Entry 9: 3',5'-bis-(Trifluoromethyl)biphenyl 3i**<sup>8</sup>

Using the *typical method*, the crude difluoroarylgermane from the photolysis of *arylgermane 1c* (50.6 mg, 0.08 mmol), TBAF (80.0 mg, 0.254 mmol),  $\text{PdCl}_2(\text{MeCN})_2$  (2.1 mg, 0.0081 mmol),  $\text{P}(2\text{-Tol})_3$  (3.7 mg, 0.088 mmol), *3,5-bis-(trifluoromethyl)bromobenzene* (46.8 mg, 0.160 mmol, 27.5  $\mu\text{L}$ ) and CuI (17.5 mg, 0.0111 mmol) were employed. Purification by FC (hexane/EtOAc, 97/3) gave *biphenyl 3i* as a colourless oil (17.1 mg, 74 %).  $^1\text{H}$  NMR (400 MHz;  $\text{CDCl}_3$ ):  $\delta$  7.45-7.54 (m, 2H, ArH), 7.61-7.63 (m, 1H, ArH), 7.86 (s, 1H, ArH), 8.01 (d,  $J = 10.0$  Hz, 2H, ArH), 8.03 (s, 2H, ArH);  $m/z$  ( $\text{EI}^+$ ) (rel. intensity) 290 ( $\text{M}^+$ , 100); 57 (40); HRMS ( $\text{EI}^+$ ) calc'd. for  $\text{C}_{14}\text{H}_8\text{F}_6$  ( $\text{M}^+$ ) 290.0530, found 290.0523,  $\Delta$  -2.5 ppm.

**Entry 10: 4-Chlorobiphenyl 3j**<sup>12</sup>

Using the *typical method*, the crude difluoroarylgermane from the photolysis of *arylgermane 1c* (50.6 mg, 0.08 mmol), TBAF (80.0 mg, 0.254 mmol),  $\text{PdCl}_2(\text{MeCN})_2$  (2.1 mg, 0.0081 mmol),  $\text{P}(2\text{-Tol})_3$  (3.7 mg, 0.088 mmol), *4-chlorobromobenzene* (30.5 mg, 0.159 mmol) and CuI (17.5 mg, 0.088 mmol) were employed. Purification by FC (hexane/EtOAc, 97/3) gave *biphenyl 3j* as a colourless oil (9.5 mg, 63 %).  $^1\text{H}$  NMR (400 MHz;  $\text{CDCl}_3$ ):  $\delta$  7.34-7.40 (m, 1H, ArH), 7.41-7.45 (m, 3H, ArH), 7.47-7.48 (m, 2H), 7.49-7.56 (m, 3H, ArH);  $^{13}\text{C}$  NMR (100 MHz;  $\text{CDCl}_3$ )  $\delta$  127.0 (d), 127.6 (d), 128.2 (2d), 128.4 (d), 128.9 (d), 129.0 (3d), 133.7 (s), 134.6 (s), 136.6 (s);  $m/z$  ( $\text{EI}^+$ ) (rel. intensity) 188 [ $\text{M}^{(35}\text{Cl})^+$ , 80], 152 (100); HRMS ( $\text{EI}^+$ ) calc'd. for  $\text{C}_{12}\text{H}_9^{35}\text{Cl}$  ( $\text{M}^+$ ) 188.0393, found 188.0385,  $\Delta$  -4.1 ppm.

**Entry 11: 4-(Phenylmethoxy)biphenyl 3k**<sup>5</sup>

Using the *typical method*, the crude difluoroarylgermane from the photolysis of *arylgermane 1c* (50.6 mg, 0.08 mmol), TBAF (80.0 mg, 0.254 mmol),  $\text{PdCl}_2(\text{MeCN})_2$  (2.1 mg, 0.0081 mmol),  $\text{P}(2\text{-Tol})_3$  (3.7 mg, 0.088 mmol), *4-(phenylmethoxy)bromobenzene* (41.9 mg, 0.159 mmol) and CuI (17.5 mg, 0.088 mmol) were employed. Purification by FC (hexane/EtOAc, 97/3) gave *biphenyl 3k* as a colourless oil (8.3 mg, 40%).  $^1\text{H}$  NMR (400 MHz;  $\text{CDCl}_3$ ):  $\delta$  5.12 (s, 2H, ArH), 7.05 (d,  $J = 8.8$  Hz, 2H, ArH), 7.30 (t,  $J = 7.3$  Hz, 1H, ArH), 7.35 (d,  $J = 7.1$  Hz, 1H, ArH), 7.38-7.48 (m, 6H, ArH), 7.51-7.56 (m, 4H, ArH);  $^{13}\text{C}$  NMR (100 MHz;  $\text{CDCl}_3$ )  $\delta$  70.1 (t), 115.1

Supplementary Material (ESI) for Chemical Communications  
This journal is (c) The Royal Society of Chemistry 2007

(2d), 126.67 (d), 126.73 (2d), 127.5 (2d), 128.0 (d), 128.2 (2d), 128.6 (2d), 128.7 (2d), 134.2 (s), 135.7 (s), 140.1 (s), 158.3 (s);  $m/z$  ( $EI^+$ ) (rel. intensity) 260 ( $M^+$ , 40), 91 (100); HRMS ( $EI^+$ ) calc'd. for  $C_{19}H_{16}O$  ( $M^+$ ) 260.1601, found 260.1190,  $\Delta$  -4.3 ppm.

**Entry 12: 1-Phenylnaphthalene 3l<sup>11</sup>**

Using the *typical method*, the crude difluoroarylgermane from the photolysis of *arylgermane 1c* (50.6 mg, 0.08 mmol), TBAF (80.0 mg, 0.254 mmol),  $PdCl_2(MeCN)_2$  (2.1 mg, 0.0081 mmol),  $P(2-Tol)_3$  (3.7 mg, 0.088 mmol), *1-bromonaphthalene* (32.9 mg, 0.159 mmol, 22.1  $\mu$ L) and CuI (17.5 mg, 0.088 mmol) were employed. Purification by FC (hexane/EtOAc, 97/3) gave *1-phenylnaphthalene 3l* as white plates (9.8 mg, 60%).  $^1H$  NMR (400 MHz;  $CDCl_3$ ):  $\delta$  7.41-7.45 (m, 3H, ArH), 7.47-7.55 (m, 6H, ArH), 7.86 (d,  $J$  = 8.0 Hz, 1H, ArH), 7.91 (dd,  $J$  = 8.0, 3.1 Hz, 2H, ArH);  $^{13}C$  NMR (100 MHz;  $CDCl_3$ )  $\delta$  125.4 (d), 125.8 (d), 126.0 (2d), 126.9 (d), 127.2 (d), 127.6 (d), 128.2 (3d), 130.1 (2d), 130.2 (s), 133.8 (s), 140.2 (s), 140.7 (s);  $m/z$  ( $EI^+$ ) (rel. intensity) 204 ( $M^+$ , 100), 101 (20); HRMS ( $EI^+$ ) calc'd. for  $C_{16}H_{12}$  ( $M^+$ ) 204.0903, found 204.0903,  $\Delta$  0.0 ppm.

**Entry 13: 4-Chloro-3',5'-bis-(trifluoromethyl)biphenyl 3m<sup>8</sup>**

Using the *typical method*, the crude difluoroarylgermane from the photolysis of *arylgermane 1d* (52.2 mg, 0.0782 mmol), TBAF (74 mg, 0.235 mmol),  $PdCl_2(MeCN)_2$  (2.1 mg, 0.008 mmol),  $P(2-Tol)_3$  (3.7 mg, 0.012 mmol), *3,5-bis-(trifluoromethyl)bromobenzene* (45.9 mg, 0.157 mmol, 27  $\mu$ L) and CuI (15.6 mg, 0.078 mmol) were employed. Purification by FC (hexane/EtOAc, 97/3) gave *biphenyl 3m* as a colourless oil (17.9 mg, 71%).  $^1H$  NMR (400 MHz;  $CDCl_3$ ):  $\delta$  7.47-7.50 (m, 2H, ArH), 7.51-7.57 (m, 2H, ArH), 7.87 (s, 2H, ArH);  $m/z$  ( $EI^+$ ) (rel. intensity) 324 [ $M(^{35}Cl)^+$ , 35], 149 (50), 83 (90), 41 (100); HRMS ( $EI^+$ ) calc'd. for  $C_{14}H_7^{35}ClF_6$  ( $M^+$ ) 324.0140, found 324.0137,  $\Delta$  -1.1 ppm.

**Entry 14: 4-Chloro-4'-(phenylmethoxy)biphenyl 3n**

Using the *typical method*, the crude difluoroarylgermane from the photolysis of *arylgermane 1d* (52.2 mg, 0.0782 mmol), TBAF (74 mg, 0.235 mmol),  $PdCl_2(MeCN)_2$  (2.1 mg, 0.008 mmol),  $P(2-Tol)_3$  (3.7 mg, 0.012 mmol), *4-(phenylmethoxy)bromobenzene* (41 mg, 0.156 mmol) and CuI (15.6 mg, 0.078 mmol) were employed. Purification by FC (hexane/EtOAc, 97/3) gave *biphenyl 3n* as a colourless oil (9.7 mg, 42%).  $^1H$  NMR (400 MHz;  $CDCl_3$ ):  $\delta$  5.14 (s, 2H,  $ArOCH_2Ph$ ), 7.05 (d,  $J$  = 8.7 Hz, 2H, ArH), 7.31-7.42 (m, 5H, ArH), 7.44-7.50 (m, 6H, ArH);  $^{13}C$  NMR (100 MHz;  $CDCl_3$ )  $\delta$  70.1 (t), 115.1 (d), 126.7 (d), 127.5 (d), 127.7 (d), 127.9 (2d), 128.0 (2d), 128.3 (d), 128.6 (d), 128.8 (d), 128.9 (d), 129.1 (d), 132.6 (s), 132.7 (s), 136.8 (s), 139.2 (s), 158.5 (s); IR  $\nu_{max}$  (neat) 3035 (C-H), 2893 (C-H), 1547 (C=C), 870, 738, 665  $cm^{-1}$ ;  $m/z$  ( $EI^+$ ) (rel. intensity) 296 [ $M(^{37}Cl)^+$ , 30], 294 [ $M(^{35}Cl)^+$ , 88], 139 (30), 84 (60), 49 (100); HRMS ( $EI^+$ ) calc'd. for  $C_{19}H_{15}^{35}ClO$  ( $M^+$ ) 294.0811, found 294.0807,  $\Delta$  -1.5 ppm.

**Entry 15: 1-(4-Chlorophenyl)naphthalene 3o<sup>13</sup>**

Using the *typical method*, the crude difluoroarylgermane from the photolysis of *arylgermane 1d* (52.2 mg, 0.0782 mmol), TBAF (74 mg, 0.235 mmol),  $PdCl_2(MeCN)_2$  (2.1 mg, 0.008 mmol),  $P(2-Tol)_3$  (3.7 mg, 0.012 mmol), *1-bromonaphthalene* (32.8 mg, 0.158 mmol, 22  $\mu$ L) and CuI (15.6 mg, 0.078 mmol) were employed. Purification by FC (hexane/EtOAc, 97/3) gave *1-(4-chlorophenyl)naphthalene 3o* as white plates (13.9 mg, 75%).  $^1H$  NMR (400 MHz;  $CDCl_3$ ):  $\delta$  7.39-7.41 (m, 5H, ArH), 7.49-7.55 (m, 3H, ArH), 7.85 (d,  $J$  = 8.5 Hz, 1H,

Supplementary Material (ESI) for Chemical Communications  
This journal is (c) The Royal Society of Chemistry 2007

ArH), 7.88 (d,  $J = 8.3$  Hz, 1H, ArH), 7.92 (d,  $J = 7.9$  Hz, 1H, ArH);  $^{13}\text{C}$  NMR (100 MHz;  $\text{CDCl}_3$ )  $\delta$  125.3 (d), 125.6 (d), 125.7 (d), 126.2 (d), 126.9 (d), 128.0 (d), 128.3 (d), 128.5 (2d), 130.1 (s), 131.3 (2d), 133.3 (s), 133.8 (s), 138.9 (s), 139.1 (s);  $m/z$  ( $\text{EI}^+$ ) (rel. intensity) 238 [ $\text{M}^{(35}\text{Cl})^+$ , 35], 203 (35), 202 (35), 84 (100); HRMS ( $\text{EI}^+$ ) calc'd. for  $\text{C}_{16}\text{H}_{11}^{35}\text{Cl}$  ( $\text{M}^+$ ) 238.0549, found 238.0541,  $\Delta$  -3.9 ppm.

**Entry 16: 4-Chloro-2'-nitrobiphenyl 3p**<sup>14, 15</sup>

Using the *typical method*, the crude difluoroarylgermane from the photolysis of *arylgermane 1d* (37.7 mg, 0.056 mmol), TBAF (53.3 mg, 0.169 mmol),  $\text{PdCl}_2(\text{MeCN})_2$  (1.5 mg, 0.006 mmol),  $\text{P}(2\text{-Tol})_3$  (2.6 mg, 0.0087 mmol), 2-bromonitrobenzene (22.8 mg, 0.113 mmol) and CuI (11.2 mg, 0.056 mmol) were employed. Purification by FC (hexane/EtOAc, 94/6) to give *biphenyl 3p* as a pale yellow oil (8.1 mg, 61%).  $^1\text{H}$  NMR (400 MHz;  $\text{CDCl}_3$ ):  $\delta$  7.27 (d,  $J = 7.0$  Hz, 2H, ArH), 7.40-7.44 (m, 3H, ArH), 7.53 (td,  $J = 7.8, 1.3$  Hz, 1H, ArH), 7.65 (td,  $J = 7.6, 1.2$  Hz, 1H, ArH), 7.90 (dd,  $J = 8.2, 1.0$  Hz, 1H, ArH);  $^{13}\text{C}$  NMR (100 MHz;  $\text{CDCl}_3$ )  $\delta$  124.3 (d), 128.5 (d), 128.9 (2d), 129.3 (2d), 131.8 (d), 132.5 (d), 134.5 (s), 135.2 (s), 135.9 (s), 149.0 (s); IR  $\nu_{\text{max}}$  (neat) 3054 (C-H), 2986 (C-H), 1588 (C=C), 1535 (N=O), 1472 (C-N), 1265 (N=O), 1009, 818, 738  $\text{cm}^{-1}$ ;  $m/z$  ( $\text{EI}^+$ ) (rel. intensity) 235 [ $\text{M}^{(37}\text{Cl})^+$ , 15], 233 [ $\text{M}^{(35}\text{Cl})^+$ , 45], 199 (70), 156 (80), 141 (100); HRMS ( $\text{EI}^+$ ) calc'd. for  $\text{C}_{12}\text{H}_8^{35}\text{ClNO}_2$  ( $\text{M}^+$ ) 233.0244, found 233.0241,  $\Delta$  -1.1 ppm.

**Entry 17: 2-Methoxy-3',5'-bis-(trifluoromethyl)biphenyl 3q**

Using the *typical method*, the crude difluoroarylgermane from the photolysis of *arylgermane 1e* (61.5 mg, 0.092 mmol), TBAF (87.4 mg, 0.277 mmol),  $\text{PdCl}_2(\text{MeCN})_2$  (2.4 mg, 0.0093 mmol),  $\text{P}(2\text{-Tol})_3$  (4.2 mg, 0.0139 mmol), 3,5-bis-(trifluoromethyl)bromobenzene (53.9 mg, 0.184 mmol, 31.7  $\mu\text{L}$ ) and CuI (18.4 mg, 0.092 mmol) were employed. Purification by FC (hexane/EtOAc, 97/3) gave *biphenyl 3q* as a colourless oil (19.2 mg, 65%).  $^1\text{H}$  NMR (400 MHz;  $\text{CDCl}_3$ ):  $\delta$  3.82 (s, 3H,  $\text{OCH}_3$ ), 7.02 (d,  $J = 8.3$  Hz, 1H, ArH), 7.08 (t,  $J = 7.1$  Hz, 1H, ArH), 7.33 (dd,  $J = 7.6, 1.7$  Hz, 1H, ArH), 7.41 (td,  $J = 8.3, 1.7$  Hz, 1H, ArH), 7.82 (s, 1H, ArH), 7.98 (s, 2H, ArH);  $^{13}\text{C}$  NMR (100 MHz;  $\text{CDCl}_3$ )  $\delta$  55.6 (q), 111.3 (2d), 120.6 (2s), 121.2 (d), 127.5 (s), 129.7 (2d), 130.2 (d), 130.6 (d), 131.0 (2s), 140.5 (s), 156.0 (s); IR  $\nu_{\text{max}}$  ( $\text{CH}_2\text{Cl}_2$ ) 3020 (C-H), 1605 (C=C), 1438 (C-F), 896, 738  $\text{cm}^{-1}$ ;  $m/z$  ( $\text{EI}^+$ ) (rel. intensity) 320 ( $\text{M}^+$ , 70), 305 (20), 285 (30), 236 (40), 84 (70), 49 (100); HRMS ( $\text{EI}^+$ ) calc'd. for  $\text{C}_{15}\text{H}_{10}\text{F}_6\text{O}$  ( $\text{M}^+$ ) 320.0636, found 320.0632,  $\Delta$  -1.2 ppm.

**Entry 18: 2-Methoxy-4'-chloro-1,1'-biphenyl 3r**<sup>12</sup>

Using the *typical method*, the crude difluoroarylgermane from the photolysis of *arylgermane 1e* (61.5 mg, 0.092 mmol), TBAF (87.4 mg, 0.277 mmol),  $\text{PdCl}_2(\text{MeCN})_2$  (2.4 mg, 0.0093 mmol),  $\text{P}(2\text{-Tol})_3$  (4.2 mg, 0.0139 mmol), 4-chlorobromobenzene (35.2 mg, 0.185 mmol) and CuI (18.4 mg, 0.092 mmol) were employed. Purification by FC (hexane/EtOAc, 97/3) gave *biphenyl 3r* as a colourless oil (9.9 mg, 49%).  $^1\text{H}$  NMR (400 MHz;  $\text{CDCl}_3$ ):  $\delta$  3.85 (s, 3H,  $\text{OCH}_3$ ), 7.02 (d,  $J = 8.0$  Hz, 1H, ArH), 7.08 (t,  $J = 7.5$  Hz, 1H, ArH), 7.30-7.44 (m, 2H, ArH), 7.46 (d,  $J = 8.0$  Hz, 2H, ArH), 7.52 (d,  $J = 8.0$  Hz, 2H, ArH);  $^{13}\text{C}$  NMR (100 MHz;  $\text{CDCl}_3$ )  $\delta$  55.5 (q), 111.2 (2d), 120.9 (2s), 121.2 (d), 127.4 (s), 129.6 (2d), 130.4 (d), 130.6 (d), 131.0 (2s), 140.2 (s), 156.3 (s);  $m/z$  ( $\text{EI}^+$ ) (rel. intensity) 218 [ $\text{M}^{(35}\text{Cl})^+$ , 75], 168 (100), 49 (45); HRMS ( $\text{EI}^+$ ) calc'd. for  $\text{C}_{13}\text{H}_{11}^{35}\text{ClO}$  ( $\text{M}^+$ ) 218.0498, found 218.0496,  $\Delta$  -0.9 ppm.

**Entry 19: 2-Methoxy-4'-(phenylmethoxy)biphenyl 3s**

Using the *typical method*, the crude difluoroarylgermane from the photolysis of *arylgermane 1e* (61.5 mg, 0.092 mmol), TBAF (87.4 mg, 0.277 mmol), PdCl<sub>2</sub>(MeCN)<sub>2</sub> (2.4 mg, 0.0093 mmol), P(2-Tol)<sub>3</sub> (4.2 mg, 0.0139 mmol), 4-(phenylmethoxy)bromobenzene (48.4 mg, 0.184 mmol) and CuI (18.4 mg, 0.092 mmol) were employed. The crude mixture was analysed by GC-MS [*Column*: SGE25QC3/BP5 25 m × 0.25 mm; *Carrier gas*: He; *Oven temp*: 60 °C (3 min), 60 °C → 300 °C over 12 min]. A yield of 11% for *biphenyl 3s* was deduced from the ratio of peak intensities for 2-naphthylmethyl methyl ether (R<sub>t</sub> 8.1 min, *m/z* 172) vs. *biphenyl 3s* (R<sub>t</sub> 13.3 min, *m/z* 290). *m/z* (EI<sup>+</sup>) (rel. intensity) 290 (M<sup>+</sup>, 20), 91 (100); HRMS (EI<sup>+</sup>) calc'd. for C<sub>20</sub>H<sub>18</sub>O 290.1307, found 290.1301, Δ -2.0 ppm.

**Entry 20: 1-(2-Methoxyphenyl)naphthalene 3t<sup>12</sup>**

Using the *typical method*, the crude difluoroarylgermane from the photolysis of *arylgermane 1e* (61.5 mg, 0.092 mmol), TBAF (87.4 mg, 0.277 mmol), PdCl<sub>2</sub>(MeCN)<sub>2</sub> (2.4 mg, 0.0093 mmol), P(2-Tol)<sub>3</sub> (4.2 mg, 0.0139 mmol), 1-bromonaphthalene (38.1 mg, 0.184 mmol, 25.6 μL) and CuI (18.4 mg, 0.092 mmol) were employed. Purification by FC (hexane/EtOAc, 97/3) gave 1-(2-methoxyphenyl)naphthalene **3t** as white plates (5.8 mg, 27%). <sup>1</sup>H NMR (400 MHz; CDCl<sub>3</sub>): δ 3.70 (s, 3H, OCH<sub>3</sub>), 7.06 (t, *J* = 8.1 Hz, 1H, ArH), 7.09 (dd, *J* = 7.5, 1.0 Hz, 1H, ArH), 7.29 (dd, *J* = 7.5, 1.8 Hz, 1H, ArH), 7.37-7.46 (m, 4H, ArH), 7.53 (d, *J* = 8.1 Hz, 1H, ArH), 7.58 (d, *J* = 8.5 Hz, 1H, ArH), 7.87 (t, *J* = 9.1 Hz, 2H, ArH); <sup>13</sup>C NMR (100 MHz; CDCl<sub>3</sub>) δ 55.6 (q), 110.9 (2d), 120.5 (2d), 125.3 (s), 125.5 (s), 125.6 (2d), 126.4 (d), 127.3 (s), 127.6 (d), 128.1 (d), 129.0 (s), 131.9 (2d), 153.2 (s); *m/z* (EI<sup>+</sup>) (rel. intensity) 234 (9M<sup>+</sup>, 100), 219 (35), 189 (40); HRMS (EI<sup>+</sup>) calc'd. for C<sub>17</sub>H<sub>14</sub>O (M<sup>+</sup>) 234.1045, found 234.1045, Δ 0.0 ppm.

**Entry 21: 4-Trifluoromethyl-3',5'-bis-(trifluoromethyl)biphenyl 3u<sup>8</sup>**

Using the *typical method*, the crude difluoroarylgermane from the photolysis of *arylgermane 1f* (46.1 mg, 0.066 mmol), TBAF (62 mg, 0.197 mmol), PdCl<sub>2</sub>(MeCN)<sub>2</sub> (1.7 mg, 0.0066 mmol), P(2-Tol)<sub>3</sub> (3 mg, 0.0099 mmol), 3,5-bis-(trifluoromethyl)bromobenzene (38.4 mg, 0.131 mmol, 22.6 μL) and CuI (13 mg, 0.066 mmol) were employed. The crude mixture was analysed by GC-MS [*Column*: SGE25QC3/BP5 25 m × 0.25 mm; *Carrier gas*: He; *Oven temp*: 60 °C (3 min), 60 °C → 300 °C over 12 min]. A yield of 26% for *biphenyl 3u* was deduced from the ratio of peak intensities for 2-naphthylmethyl methyl ether (R<sub>t</sub> 8.0 min, *m/z* 172) vs. *biphenyl 3u* (R<sub>t</sub> 6.6 min, *m/z* 358). *m/z* (EI<sup>+</sup>) (rel. intensity) 358 (M<sup>+</sup>, 25), 84 (70), 49 (100); HRMS (EI<sup>+</sup>) calc'd. for C<sub>15</sub>H<sub>7</sub>F<sub>9</sub> (M<sup>+</sup>) 358.0404, found 358.0386, Δ -5.0 ppm.

**Entry 22: 4-Trifluoromethyl-4'-chloro-1,1'-biphenyl 3v<sup>16</sup>**

Using the *typical method*, the crude difluoroarylgermane from the photolysis of *arylgermane 1f* (46.1 mg, 0.066 mmol), TBAF (62 mg, 0.197 mmol), PdCl<sub>2</sub>(MeCN)<sub>2</sub> (1.7 mg, 0.0066 mmol), P(2-Tol)<sub>3</sub> (3 mg, 0.0099 mmol), 4-chlorobromobenzene (25.1 mg, 0.131 mmol) and CuI (13 mg, 0.066 mmol) were employed. The crude mixture was analysed by GC-MS [*Column*: SGE25QC3/BP5 25 m × 0.25 mm; *Carrier gas*: He; *Oven temp*: 60 °C (3 min), 60 °C → 300 °C over 12 min]. A yield of 11% for *biphenyl 3v* was deduced from the ratio of peak intensities for 2-naphthylmethyl methyl ether (R<sub>t</sub> 8.0 min, *m/z* 172) vs. *biphenyl 3v* (R<sub>t</sub> 10.2 min, *m/z* 256). *m/z* (EI<sup>+</sup>) (rel. intensity) 256 (M<sup>+</sup>, 50), 141 (100), 115 (45); HRMS (EI<sup>+</sup>) calc'd. for C<sub>13</sub>H<sub>8</sub><sup>35</sup>ClF<sub>3</sub> (M<sup>+</sup>) 256.0267, found 256.0265, Δ -0.6 ppm.

### Stability profiling of fluoros-tagged phenylgermane **1c** (Table 2)

Stability tests were carried out using 8 different conditions on fluoros-tagged aryl germane **1c** using either 9-methylantrance (**4**) or 4,4'-di-*tert*-butyl-1,1'-biphenyl (**5**) as the internal standard.<sup>17, 18</sup> The tests were performed in duplicate in parallel against control runs containing no reagents. Thus, a solution of the fluoros-tagged arylgermane **1c** (5 mg) and internal standard **4** or **5** (1 mg) in the appropriate reaction solvent (5 mL) was allowed to stir at RT for 3 h. The reaction mixtures were then quenched with water (5 mL) and diluted with Et<sub>2</sub>O (5 mL) before being extracted with Et<sub>2</sub>O (5 × 10 mL). The organic layer was evaporated to dryness under a stream of N<sub>2</sub> and the residue was dissolved with acetonitrile (5 mL) for analysis by HPLC as follows: *Column*: XTerra RP8 4.6 mm × 150 mm, 5 μm; *Mobile phase*: MeCN/H<sub>2</sub>O = 80:20; *Flow rate*: 1 mLmin<sup>-1</sup>; *Detection*: UV diode array at 245 nm; *Injection volume*: 2 μL. The ratio of the peak areas was calculated for substrate **1c** and internal standard **4** or **5**. The mean percentage recovery of compound **1c** over the two runs was compared to the reagentless control run in appropriate solvents for each of the 8 conditions. The chromatograms for representative control runs using internal standards **4** and **5** are shown below.

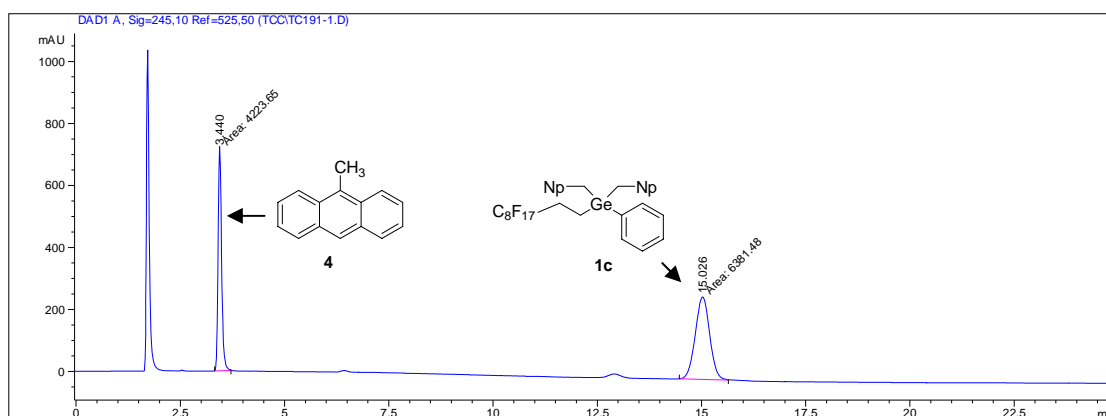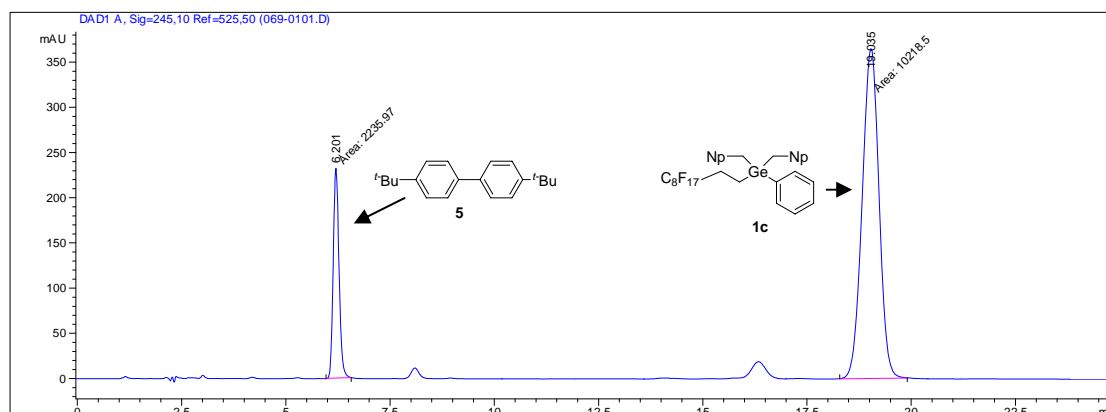

| # | Conditions <sup>a</sup>                         | Ref. | Rec. 1c/%<br>(Run 1) <sup>a</sup> | Rec. 1c/%<br>(Run 2) <sup>a</sup> | Rec. 1c/%<br>(Mean) <sup>a</sup> |
|---|-------------------------------------------------|------|-----------------------------------|-----------------------------------|----------------------------------|
| 1 | NaBH <sub>4</sub> , THF                         | 4    | 106                               | 107                               | 107                              |
| 2 | LiAlH <sub>4</sub> , THF                        | 5    | 97                                | 110                               | 104                              |
| 3 | Hydrazine/DMF (2% v/v)                          | 4    | 114                               | 93                                | 104                              |
| 4 | HS(CH <sub>2</sub> ) <sub>2</sub> OH, DBU, DMF  | 4    | 109                               | 95                                | 102                              |
| 5 | Piperidine/DMF (20% v/v)                        | 4    | 111                               | 91                                | 101                              |
| 6 | TBAF, THF                                       | 4    | 101                               | 103                               | 102                              |
| 7 | <i>m</i> -CPBA, CH <sub>2</sub> Cl <sub>2</sub> | 4    | 75                                | 76                                | 76                               |
| 8 | TFA/CH <sub>2</sub> Cl <sub>2</sub> (50% v/v)   | 4    | 18                                | 22                                | 20                               |

<sup>a</sup>% recovery of **1c** by HPLC vs. the internal standard.

Table Showing stability profile of fluoros-tagged phenylgermane **1c**.

### Synthesis of Boscalid<sup>®</sup> (**16**) and its alkynyl derivatives **17** and **18** (Scheme 1)

#### (3,3,4,4,5,5,6,6,7,7,8,8,9,9,10,10,10-Heptafluorodecyl)(4-iodophenyl)bis-(naphthalen-2-ylmethyl)germane **1g**

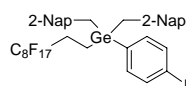

To a solution of *1,4*-diiodobenzene (0.1258 g, 0.382 mmol) in THF (10.0 mL) at -78 °C was added <sup>t</sup>BuLi (0.546 mL, 0.764 mmol, 1.4M) dropwise resulting in a dark red solution. The solution was stirred at -78 °C for 30 min to achieve lithium-halogen exchange. The resulting solution mixture was added *bromo*-(3,3,4,4,5,5,6,6,7,7,8,8,9,9,10,10,10-heptafluorodecyl)bis-(naphthalen-2-ylmethyl)germane (0.281 g, 0.319 mmol) at -78 °C and stirred for 1 h than warmed up to rt for 16 h. The reaction mixture was diluted with Et<sub>2</sub>O (20.0 mL) and a solution of 1.0 M NH<sub>4</sub>Cl was added to the reaction mixture until no effervescence occurred. Following extraction with (2 × 20.0 mL) of Et<sub>2</sub>O, the combined organic extracts were dried over MgSO<sub>4</sub> and evaporated *in vacuo* to give green oily residue which was purified by FC (hexane/EtOAc, 97/3) to give (*4*-iodophenyl)germane **1f** as a pale yellow oil (0.4706 g, 87%). <sup>1</sup>H NMR (400 MHz; CDCl<sub>3</sub>): δ 1.20 (m, 2H, CH<sub>2</sub>CH<sub>2</sub>Ge), 1.87 (m, 2H, CH<sub>2</sub>CH<sub>2</sub>Ge), 2.77 (s, 4H, 2 × GeCH<sub>2</sub>Nap), 7.07 (dd, *J* = 6.7, 1.7 Hz, 2H, ArH), 7.25 (d, *J* = 8.2 Hz, 2H, ArH), 7.35 (d, *J* = 7.7 Hz, 2H, ArH), 7.41-7.47 (m, 6H, ArH), 7.65 (d, *J* = 7.7 Hz, 2H, ArH), 7.70 (d, *J* = 8.2 Hz, 2H, ArH), 7.79 (d, *J* = 7.7 Hz, 2H, ArH); <sup>13</sup>C NMR (100 MHz; CDCl<sub>3</sub>) δ 1.8 (t), 22.4 (2t), 26.2 (t, *J*<sub>CF</sub> 23.0 Hz), 96.2 (s), 108.3 (s), 110.2 (s), 110.7 (3s), 110.97 (s), 111.01 (s), 117.9 (s), 125.0 (2d), 125.7 (2d), 126.2 (2d), 127.0 (2d), 127.2 (2d), 127.6 (2d), 128.2 (2d), 128.6 (2d), 131.3 (2s), 133.7 (2s), 135.1 (2d), 135.7 (s), 136.1 (2s); <sup>19</sup>F NMR (376 MHz; CDCl<sub>3</sub>): δ -126.1 (s, 2F), -123.6 (s, 2F), -122.7 (s, 2F), -121.9 (m, 6F), -116.3 [quintet, *J* = 14.5 Hz, 2F, (CF<sub>2</sub>)<sub>6</sub>CF<sub>2</sub>CF<sub>3</sub>], -80.7 [t, *J* = 10 Hz, 3F, (CF<sub>2</sub>)<sub>6</sub>CF<sub>2</sub>CF<sub>3</sub>]; IR ν<sub>max</sub> (neat) 3035 (C-H), 2988 (C-H) 1549 (C=C), 1421 (C-F), 1265, 1050 (C-I), 896, 740 cm<sup>-1</sup>; *m/z* (FAB<sup>+</sup>) (rel. intensity) 864 [(M-NapCH<sub>2</sub>)<sup>+</sup>, 2], 803 (1), 709 (5), 141 (100); HRMS (FAB<sup>+</sup>) calc'd. for C<sub>27</sub>H<sub>17</sub>F<sub>17</sub><sup>74</sup>GeI [M-(NapCH<sub>2</sub>)<sup>+</sup>] 864.9310, found 864.9307, Δ -0.3 ppm.

#### 4-Chloro-2'-aminobiphenyl **11**<sup>14</sup>

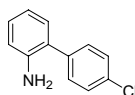



Supplementary Material (ESI) for Chemical Communications  
This journal is (c) The Royal Society of Chemistry 2007

To a solution of *4-chloro-2'-nitrobiphenyl* (**3p**, 15 mg, 0.064 mmol) in THF-EtOH (1:1, 10 mL) was added tin(II) chloride (122 mg, 0.64 mmol) and conc. HC (1 mL) and the reaction mixture was stirred for 16 h. A sat. solution of K<sub>2</sub>CO<sub>3</sub> was added and the reaction mixture was partitioned between Et<sub>2</sub>O (40.0 mL) and water (10.0 mL). The phases were separated, the aqueous phase extracted with CH<sub>2</sub>Cl<sub>2</sub> (2 × 10.0 mL) and the combined organic extracts were dried over MgSO<sub>4</sub>. Purification by FC (hexane/EtOAc, 90/10) gave *4-chloro-2'-aminobiphenyl* **11** as a colourless oil (10.3 mg, 88%). <sup>1</sup>H NMR (400 MHz; CDCl<sub>3</sub>): δ 3.73 (brs, 2H, NH<sub>2</sub>), 6.77 (dd, *J* = 7.9, 1.0 Hz, 1H, ArH), 6.83 (td, *J* = 7.6, 1.0 Hz, 1H, ArH), 7.09 (dd, *J* = 7.6, 1.5 Hz, 1H, ArH), 7.17 (td, *J* = 7.6, 1.5 Hz, 1H, ArH), 7.38-7.46 (m, 4H, ArH); <sup>13</sup>C NMR (100 MHz; CDCl<sub>3</sub>) δ 115.7 (d), 118.7 (d), 126.3 (s), 128.8 (d), 129.0 (2d), 130.3 (d), 130.5 (2d), 133.1 (s), 137.9 (s), 143.4 (s); IR ν<sub>max</sub> (neat) 3475 (N-H), 3383 (N-H), 3083 (C-H), 1886 (comb), 1616 (C=C), 1472 (C-N), 1087, 1008, 810, 744 cm<sup>-1</sup>; *m/z* (EI<sup>+</sup>) (rel. intensity) 205 [M(<sup>37</sup>Cl)<sup>+</sup>, 9], 203 [M(<sup>35</sup>Cl)<sup>+</sup>, 25], 167 (25), 49 (30), 84 (90), 49 (100); HRMS (EI<sup>+</sup>) calc'd. for C<sub>12</sub>H<sub>10</sub><sup>35</sup>ClN (M<sup>+</sup>) 203.0502, found 203.0501, Δ -0.4 ppm.

**Boscalid**<sup>®</sup> **16**<sup>19, 20</sup>

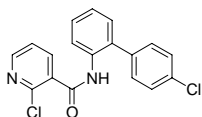

To a solution of *4-chloro-2'-aminobiphenyl* (**11**, 20.0 mg, 0.098 mmol) in CH<sub>2</sub>Cl<sub>2</sub> (10 mL) was added *2-chloro-3-nicotinic acid* (17.3 mg, 0.098 mmol), DMAP (0.5 mg, 0.004 mmol) and DCC (22.3 mg, 0.108 mmol) and the reaction mixture was stirred for 16 h. A sat. solution of K<sub>2</sub>CO<sub>3</sub> was added to the reaction mixture and the reaction mixture was partitioned between Et<sub>2</sub>O (40.0 mL) and water (10.0 mL), extracted with CH<sub>2</sub>Cl<sub>2</sub> (2 × 10.0 mL) and dried over MgSO<sub>4</sub>. Purification by FC (hexane/EtOAc, 75/25) gave *Boscalid*<sup>®</sup> (**16**) as a colourless oil (22.1 mg, 65%). <sup>1</sup>H NMR (400 MHz; CDCl<sub>3</sub>): δ 7.27 (d, *J* = 4.8 Hz, 2H, ArH), 7.31-7.36 (m, 3H, ArH), 7.41-7.47 (m, 3H, ArH), 8.13 (dd, *J* = 7.7, 1.2 Hz, 1H, ArH), 8.16 (brs, 1H, NH), 8.41 (d, *J* = 8.2 Hz, 1H, ArH), 8.44 (dd, *J* = 4.6, 1.7 Hz, 1H, ArH); <sup>13</sup>C NMR (100 MHz; CDCl<sub>3</sub>) δ 122.1 (d), 122.9 (d), 125.3 (d), 128.9 (d), 129.3 (2d), 130.2 (d), 130.8 (2d), 131.0 (s), 132.2 (s), 134.3 (s), 134.4 (s), 136.2 (s), 140.1 (d), 146.6 (s), 151.3 (d), 162.5 (s); IR ν<sub>max</sub> (neat) 3338 (N-H), 3084 (C-H), 2935 (C-H), 1887 (comb), 1656 (C=O), 1580 (C=C), 1472, 810 cm<sup>-1</sup>; *m/z* (EI<sup>+</sup>) (rel. intensity) 347 [M(<sup>37</sup>Cl<sup>37</sup>Cl)H<sup>+</sup>, 10], 345 [M(<sup>37</sup>Cl<sup>35</sup>Cl)H<sup>+</sup>, 35], 343 [M(<sup>35</sup>Cl<sup>35</sup>Cl)H<sup>+</sup>, 40], 309 (15), 225 (100); HRMS (CI<sup>+</sup>) calc'd. for C<sub>18</sub>H<sub>13</sub><sup>35</sup>Cl<sub>2</sub>N<sub>2</sub>O (MH<sup>+</sup>) 343.0405, found 343.0409, Δ 1.1 ppm.

**(3,3,4,4,5,5,6,6,7,7,8,8,9,9,10,10,10-Heptafluorodecyl)bis(naphthalen-2-ylmethyl)(4-trimethylsilylethynylphenyl)germane 6**

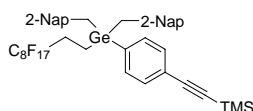

Using conditions adapted from those of Menchi,<sup>21</sup> Pd(OAc)<sub>2</sub> (1.0 mg, 0.0045 mmol) and PPh<sub>3</sub> (3.7 mg, 0.014 mmol) were dissolved in degassed DMF (1 mL) and stirred for 30 min at RT to give a solution of the active Pd(0) catalyst. This solution was then added to a solution of (*4-iodophenyl*)germane **1g** (25.1 mg, 0.025 mmol) in degassed DMF (2 mL). *Trimethylsilylacetylene* (4.9 mg, 0.05 mmol, 7 μL), CuI (2 mg, 0.01 mmol) and <sup>n</sup>BuNH<sub>2</sub> (5 mL) were then added to the reaction mixture and the resulting reaction mixture was stirred at 55 °C for 16 h. The reaction mixture was then diluted with Et<sub>2</sub>O (20.0 mL), washed with water (3 × 10.0 mL), the organic phase

dried over  $\text{MgSO}_4$  and evaporated *in vacuo*. Purification by FC (hexane/EtOAc, 95/5) gave *alkynylgermane* **6** as a pale yellow oil (12.6 mg, 52%).  $^1\text{H}$  NMR (400 MHz;  $\text{C}_6\text{D}_6$ ):  $\delta$  0.27 (s, 9H,  $\text{Si}(\text{CH}_3)_3$ ), 1.02 (m, 2H,  $\text{CH}_2\text{CH}_2\text{Ge}$ ), 1.71 (m, 2H,  $\text{CH}_2\text{CH}_2\text{Ge}$ ), 2.36 (s, 4H,  $2 \times \text{GeCH}_2\text{Nap}$ ), 6.86 (dd,  $J = 8.4, 1.8$  Hz, 2H, ArH), 6.93 (d,  $J = 8.1$  Hz, 2H, ArH), 7.18-7.20 (m, 3H, ArH), 7.21 (dd,  $J = 6.8, 1.4$  Hz, 1H, ArH), 7.25 (dd,  $J = 6.8, 1.4$  Hz, 1H, ArH), 7.27 (dd,  $J = 6.8, 1.4$  Hz, 1H, ArH), 7.46 (d,  $J = 5.5$  Hz, 2H, ArH), 7.53 (d,  $J = 8.1$  Hz, 2H, ArH), 7.59 (d,  $J = 8.1$  Hz, 2H, ArH);  $^{13}\text{C}$  NMR (100 MHz;  $\text{C}_6\text{D}_6$ )  $\delta$  0.07 (3s), 2.1 (t), 22.5 (2t), 26.6 (t,  $J_{\text{CF}} 23.0$  Hz), 95.8 (s), 105.6 (s), 105.8 (s), 110.7 (s), 111.2 (s), 111.3 (s), 111.6 (3s), 118.6 (s), 124.7 (s), 125.3 (2d), 126.1 (2d), 126.5 (2d), 127.3 (2d), 127.5 (2d), 128.0 (2d), 128.4 (2d), 131.9 (2d), 132.0 (2s), 134.2 (2d), 134.4 (2s), 136.6 (2s), 138.0 (s);  $^{19}\text{F}$  NMR (376 MHz;  $\text{C}_6\text{D}_6$ ):  $\delta$  -125.1 (s, 2F), -122.3 (s, 2F), -121.7 (s, 2F), -120.8 (m, 4F), -120.3 (s, 2F), -114.9 [quintet,  $J = 15.0$  Hz, 2F,  $(\text{CF}_2)_6\text{CF}_2\text{CF}_3$ ], -79.9 [t,  $J = 9.8$  Hz, 3F,  $(\text{CF}_2)_6\text{CF}_2\text{CF}_3$ ]; IR  $\nu_{\text{max}}$  (neat) 3052 (C-H), 2982 (C-H), 2360 (CC), 1592 (C=C), 1421 (C-F), 1260 (C-Si), 897, 740  $\text{cm}^{-1}$ ;  $m/z$  ( $\text{FAB}^+$ ) (rel. intensity) 835 [ $(\text{M-NapCH}_2)^+$ , 60], 709 (55), 313 (80), 141 (100); HRMS ( $\text{FAB}^+$ ) calc'd. for  $\text{C}_{32}\text{H}_{26}\text{F}_{17}^{74}\text{GeSi}$  [ $(\text{M-NapCH}_2)^+$ ] 835.0739, found 835.0734,  $\Delta$  -0.6 ppm.

**(3,3,4,4,5,5,6,6,7,7,8,8,9,9,10,10,10-Heptadecafluorodecyl)bis(naphthalen-2-ylmethyl){4-[(3-methyl-3-hydroxybutynyl)phenyl]}germane **8****

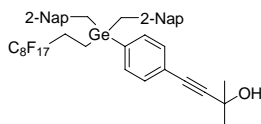

Using conditions adapted from those of Menchi,<sup>21</sup>  $\text{Pd}(\text{OAc})_2$  (1.5 mg, 0.007 mmol) and  $\text{PPh}_3$  (5.5 mg, 0.021 mmol) were dissolved in degassed DMF (1 mL) and stirred for 30 min at RT to give a solution of the active Pd(0) catalyst. This solution was then added to a solution of (*4-iodophenyl*)germane **1g** (128.6 mg, 0.128 mmol) in degassed DMF (2 mL). *2-Methylbut-3-yn-2-ol* (21.5 mg, 0.256 mmol, 25  $\mu\text{L}$ ),  $\text{CuI}$  (2.8 mg, 0.014 mmol) and  $n\text{BuNH}_2$  (5 mL) were then added to the reaction mixture and the resulting reaction mixture was stirred at 55  $^\circ\text{C}$  for 16 h. The reaction mixture was then diluted with  $\text{Et}_2\text{O}$  (20.0 mL), washed with water ( $3 \times 10.0$  mL), the organic phase dried over  $\text{MgSO}_4$  and evaporated *in vacuo*. Purification by FC (hexane/EtOAc, 85/15) gave *alkynylgermane* **8** as a pale yellow oil (83.6 mg, 68%).  $^1\text{H}$  NMR (400 MHz;  $\text{CDCl}_3$ ):  $\delta$  1.15 (m, 2H,  $\text{CH}_2\text{CH}_2\text{Ge}$ ), 1.65 (s, 6H,  $\text{CC}(\text{CH}_3)_2\text{OH}$ ), 1.81 (m, 2H,  $\text{CH}_2\text{CH}_2\text{Ge}$ ), 2.07 (brs, 1H, OH), 2.72 (s, 4H,  $2 \times \text{GeCH}_2\text{Nap}$ ), 7.04 (dd,  $J = 8.4, 1.7$  Hz, 2H, ArH), 7.27 (d,  $J = 7.8$  Hz, 2H, ArH), 7.34 (s, 2H, ArH), 7.36-7.46 (m, 6H, ArH), 7.62 (d,  $J = 7.8$  Hz, 2H, ArH), 7.67 (d,  $J = 8.4$  Hz, 2H, ArH), 7.77 (d,  $J = 7.8$  Hz, 2H, ArH);  $^{13}\text{C}$  NMR (100 MHz;  $\text{CDCl}_3$ )  $\delta$  1.8 (t), 22.4 (2t), 26.2 (t,  $J_{\text{CF}} 23.0$  Hz), 31.5 (2q), 65.7 (s), 81.9 (s), 94.8 (s), 110.2 (s), 110.6 (2s), 110.7 (s), 110.9 (2s), 111.0 (s), 117.9 (s), 123.6 (s), 124.9 (2d), 125.7 (2d), 126.1 (2d), 127.0 (2d), 127.3 (2d), 127.6 (2d), 128.1 (2d), 131.3 (2d+2s), 133.7 (2d+2s), 136.2 (2s), 137.1 (s);  $^{19}\text{F}$  NMR (376 MHz;  $\text{CDCl}_3$ ):  $\delta$  -125.2 (s, 2F), -122.6 (s, 2F), -121.8 (s, 2F), -121.0 (m, 6F), -115.4 [quintet,  $J = 14.3$  Hz, 2F,  $(\text{CF}_2)_6\text{CF}_2\text{CF}_3$ ], -79.8 [t,  $J = 9.8$  Hz, 3F,  $(\text{CF}_2)_6\text{CF}_2\text{CF}_3$ ]; IR  $\nu_{\text{max}}$  (neat) 3320 (OH, br), 3054 (C-H), 2985 (C-H), 2354 (CC), 1595 (C=C), 1421 (C-F), 895, 740  $\text{cm}^{-1}$ ;  $m/z$  ( $\text{FAB}^+$ ) (rel. intensity) 821 [ $(\text{M-NapCH}_2)^+$ , 55], 551 (50), 279 (45), 141 (100); HRMS ( $\text{FAB}^+$ ) calc'd. for  $\text{C}_{32}\text{H}_{24}\text{F}_{17}\text{O}^{74}\text{Ge}$  [ $(\text{M-NapCH}_2)^+$ ] 821.0762, found 821.0762,  $\Delta$  -0.2 ppm.

**(3,3,4,4,5,5,6,6,7,7,8,8,9,9,10,10,10-Heptadecafluorodecyl)bis(naphthalen-2-ylmethyl)(4-phenylethynyl)germane 7**

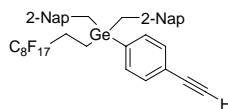

*Method A:* Using conditions adapted from those of Vasella,<sup>22</sup> a mixture of K<sub>2</sub>CO<sub>3</sub> and KF (1:1 w/w, 100 mg) was added to a solution of (4-trimethylsilylethynylphenyl)germane **6** (115.6 mg, 0.118 mmol) in MeOH-THF (1:1 v/v, 10 mL) and the resulting reaction mixture stirred at 80 °C for 8 h. The resulting reaction mixture was diluted with Et<sub>2</sub>O (20.0 mL), washed with water (3 × 10.0 mL) and the organic phase was dried over MgSO<sub>4</sub> and evaporated *in vacuo*. Purification by FC (hexane/EtOAc, 95/5) gave (4-phenylethynyl)germane **7** as pale yellow oil (69.7 mg, 67%). <sup>1</sup>H NMR (400 MHz; CDCl<sub>3</sub>): δ 1.14 (m, 2H, CH<sub>2</sub>CH<sub>2</sub>Ge), 1.81 (m, 2H, CH<sub>2</sub>CH<sub>2</sub>Ge), 2.72 (s, 4H, 2 × GeCH<sub>2</sub>Nap), 3.15 (s, 1H, C<sub>6</sub>H<sub>4</sub>CCH), 7.04 (dd, *J* = 8.4, 0.8 Hz, 2H, ArH), 7.29 (d, *J* = 8.2 Hz, 2H, ArH), 7.34 (s, 2H, ArH), 7.37-7.48 (m, 6H, ArH), 7.61 (d, *J* = 8.0 Hz, 2H, ArH), 7.68 (d, *J* = 8.4 Hz, 2H, ArH), 7.77 (d, *J* = 7.6 Hz, 2H, ArH); <sup>13</sup>C NMR (100 MHz; CDCl<sub>3</sub>) δ 2.1 (t), 22.5 (2t), 26.6 (t, *J*<sub>CF</sub> 23.4 Hz), 78.2 (s), 83.4 (s), 108.3 (s), 110.2 (s), 110.6 (s), 110.9 (3s), 111.0 (s), 117.9 (s), 124.7 (s), 125.3 (2d), 126.1 (2d), 126.5 (2d), 127.4 (2d), 127.4 (2d), 128.0 (2d), 128.3 (2d), 131.8 (2d), 132.0 (2s), 134.3 (2d), 134.3 (2s), 136.5 (2s), 137.8 (s); <sup>19</sup>F NMR (376 MHz; CDCl<sub>3</sub>): δ -125.1 (s, 2F), -122.5 (s, 2F), -121.8 (s, 2F), -121.0 (m, 6F), -115.3 [quintet, *J* = 14.8 Hz, 2F, (CF<sub>2</sub>)<sub>6</sub>CF<sub>2</sub>CF<sub>3</sub>], -79.8 [t, *J* = 9.9 Hz, 3F, (CF<sub>2</sub>)<sub>6</sub>CF<sub>2</sub>CF<sub>3</sub>]; IR ν<sub>max</sub> (neat) 3253 (CC-H), 3048 (C-H), 2984 (C-H), 2360 (CC), 1592 (C=C), 1420 (C-F), 910, 740 cm<sup>-1</sup>; *m/z* (FAB<sup>+</sup>) (rel. intensity) 763 [(M-NapCH<sub>2</sub>)<sup>+</sup>, 40], 549 (15), 279 (45), 141 (100); HRMS (FAB<sup>+</sup>) calc'd. for C<sub>29</sub>H<sub>18</sub>F<sub>17</sub><sup>74</sup>Ge [M-(NapCH<sub>2</sub>)<sup>+</sup>] 763.0343, found 763.0350, Δ 0.9 ppm.

*Method B:* Using conditions adapted from those of Walton,<sup>23</sup> powdered KOH (50 mg, 0.893 mmol) was added to a solution of 4-[(3-methyl-3-hydroxybutynyl)phenyl]germane **8** (80.0 mg, 0.083 mmol) in THF (10 mL). The reaction mixture was then stirred at 80 °C for 1 h. The resulting reaction mixture was diluted with Et<sub>2</sub>O (20.0 mL), washed with water (3 × 10.0 mL) and the organic phase was dried over MgSO<sub>4</sub> and evaporated *in vacuo*. Purification by FC (hexane/EtOAc, 90/10) gave (4-phenylethynyl)germane **7** as a pale yellow oil (73.8 mg, 98%). Analytical data as above.

**(3,3,4,4,5,5,6,6,7,7,8,8,9,9,10,10,10-Heptadecafluorodecyl)bis(naphthalen-2-ylmethyl)(4-propynylphenyl)germane 10**

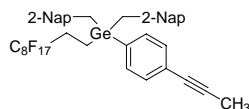

Using conditions adapted from those of Feldman,<sup>24</sup> a solution of *n*-BuLi (50 μL, 0.09 mmol, 1.8 M in hexanes) was added dropwise to a solution of (4-phenylethynyl)germane **7** (73.8 mg, 0.082 mmol) and DMPU (10 μL, 0.083 mmol) in THF (10 mL) at -40 °C. The resulting reaction mixture was stirred for 1 h at this temperature to give a brown solution. Methyltriflate (20.3 mg, 0.124 mmol, 14 μL) was then added and stirring continued for a further 16 h. The reaction mixture was diluted with Et<sub>2</sub>O (10.0 mL) and a solution of 1.0 M NH<sub>4</sub>Cl was added to the reaction mixture until no effervescence occurred. Following extraction with (2 × 20.0 mL) of Et<sub>2</sub>O, the combined organic extracts were dried over MgSO<sub>4</sub> and evaporated *in vacuo* to give a pale yellow residue which was purified by FC (hexane/EtOAc, 90/10) to give (4-propynylphenyl)germane **10** as pale yellow oil (65.4 mg,

87%).  $^1\text{H}$  NMR (400 MHz;  $\text{CDCl}_3$ ):  $\delta$  1.21 (m, 2H,  $\text{CH}_2\text{CH}_2\text{Ge}$ ), 1.80 (m, 2H,  $\text{CH}_2\text{CH}_2\text{Ge}$ ), 2.08 (s, 3H,  $\text{CCCH}_3$ ), 2.71 (s, 4H,  $2 \times \text{GeCH}_2\text{Nap}$ ), 7.03 (dd,  $J = 8.4, 1.6$  Hz, 2H, ArH), 7.23 (d,  $J = 8.2$  Hz, 2H, ArH), 7.33 (s, 2H, ArH), 7.35-7.42 (m, 6H, ArH), 7.60 (d,  $J = 7.8$  Hz, 2H, ArH), 7.66 (d,  $J = 8.4$  Hz, 2H, ArH), 7.76 (d,  $J = 7.8$  Hz, 2H, ArH);  $^{13}\text{C}$  NMR (100 MHz;  $\text{CDCl}_3$ )  $\delta$  2.1 (t), 3.2 (q), 22.5 (2t), 26.3 (t,  $J_{\text{CF}} 23.2$  Hz), 78.3 (s), 83.5 (s), 108.1 (s), 110.2 (s), 110.6 (s), 110.8 (3s), 111.0 (s), 117.9 (s), 124.7 (s), 125.3 (2d), 126.1 (2d), 126.5 (2d), 127.4 (2d), 127.4 (2d), 128.2 (2d), 128.3 (2d), 131.8 (2d), 132.0 (2s), 134.6 (2d), 134.8 (2s), 136.9 (2s), 137.7 (s);  $^{19}\text{F}$  NMR (376 MHz;  $\text{CDCl}_3$ ):  $\delta$  -126.1 (s, 2F), -123.5 (s, 2F), -122.7 (s, 2F), -121.9 (m, 6F), -116.3 [quintet,  $J = 15.2$  Hz, 2F,  $(\text{CF}_2)_6\text{CF}_2\text{CF}_3$ ], -80.7 [t,  $J = 9.7$  Hz, 3F,  $(\text{CF}_2)_6\text{CF}_2\text{CF}_3$ ]; IR  $\nu_{\text{max}}$  (neat) 3046 (C-H), 2975 (C-H), 2355 (CC), 1594 (C=C), 1419 (C-F), 913, 740  $\text{cm}^{-1}$ ;  $m/z$  (FAB $^+$ ) (rel. intensity) 777 [(M-NapCH $_2$ ) $^+$ , 30], 549 (15), 279 (55), 141 (100); HRMS (FAB $^+$ ) calc'd. for  $\text{C}_{30}\text{H}_{20}\text{F}_{17}^{74}\text{Ge}$  [M-(NapCH $_2$ ) $^+$ ] 777.0500, found 777.0498,  $\Delta$  -0.2 ppm.

#### 4-Propynyl-2'-nitrobiphenyl **12**

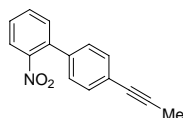

Using the *typical method*, the crude difluoroarylgermane from the photolysis of *arylgermane* **10** (33.2 mg, 0.049 mmol), TBAF (46.6 mg, 0.148 mmol),  $\text{PdCl}_2(\text{MeCN})_2$  (1.5 mg, 0.0058 mmol),  $\text{P}(\text{2-Tol})_3$  (2.6 mg, 0.0087 mmol), *2-bromonitrobenzene* (19.9 mg, 0.099 mmol) and  $\text{CuI}$  (9.8 mg, 0.049 mmol) were employed. Purification by FC (hexane/EtOAc, 90/10) gave *biphenyl* **12** as yellow oil (6.3 mg, 54%).  $^1\text{H}$  NMR (400 MHz;  $\text{CDCl}_3$ ):  $\delta$  2.07 (s, 3H,  $\text{CH}_3$ ), 7.24 (d,  $J = 7.0$ , 2H, ArH), 7.41-7.48 (m, 3H, ArH), 7.48 (td,  $J = 7.9, 1.4$  Hz, 1H, ArH), 7.62 (td,  $J = 7.5, 1.1$  Hz, 1H, ArH), 7.86 (dd,  $J = 8.1, 1.1$  Hz, 1H, ArH);  $^{13}\text{C}$  NMR (100 MHz;  $\text{CDCl}_3$ )  $\delta$  4.4 (q), 79.2 (s), 87.1 (s), 124.1 (s), 124.2 (d), 127.8 (2d), 128.3 (d), 131.77 (2d), 131.8 (d), 132.3 (d), 135.8 (s), 136.4 (s), 149.1 (s); IR  $\nu_{\text{max}}$  (neat) 3054 (C-H), 2987 (C-H), 2360 (CC), 1588 (C=C), 1537 (N=O), 1265 (N=O), 896, 738, 705  $\text{cm}^{-1}$ ;  $m/z$  (EI $^+$ ) (rel. intensity) 237 ( $\text{M}^+$ , 20), 198 (100), 168 (50), 87 (70); HRMS (EI $^+$ ) calc'd. for  $\text{C}_{15}\text{H}_{11}\text{NO}_2$  ( $\text{M}^+$ ) 237.0790, found 237.0784,  $\Delta$  -2.4 ppm.

#### 4-Propynyl-2'-aminobiphenyl **13**<sup>19</sup>

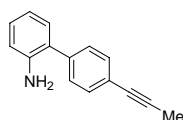

To a solution of *nitrobiphenyl* **12** (6.3 mg, 0.027 mmol) in THF-EtOH (1:1, 10 mL) was added tin(II) chloride (50.1 mg, 0.27 mmol) and conc. HCl (1 mL) and the reaction mixture was stirred for 16 h. A sat. solution of  $\text{K}_2\text{CO}_3$  was added and the reaction mixture was partitioned between  $\text{Et}_2\text{O}$  (40.0 mL) and water (10.0 mL). The phases were separated, the aqueous phase extracted with  $\text{CH}_2\text{Cl}_2$  ( $2 \times 10.0$  mL) and the combined organic extracts were dried over  $\text{MgSO}_4$ . Purification by FC (hexane/EtOAc, 90/10) gave *4-propynyl-2'-aminobiphenyl* **13** as a colourless oil (4.4 mg, 80%).  $^1\text{H}$  NMR (400 MHz;  $\text{CDCl}_3$ ):  $\delta$  2.08 (s, 3H,  $\text{CH}_3$ ), 3.76 (brs, 2H,  $\text{NH}_2$ ), 6.76 (d,  $J = 7.9$  Hz, 1H, ArH), 6.82 (t,  $J = 7.3$  Hz, 1H, ArH), 7.11 (dd,  $J = 7.5, 1.2$  Hz, 1H, ArH), 7.16 (td,  $J = 7.8, 1.4$  Hz, 1H, ArH), 7.39 (d,  $J = 8.2$  Hz, 2H, ArH), 7.46 (d,  $J = 8.2$  Hz, 2H, ArH);  $^{13}\text{C}$  NMR (100 MHz;  $\text{CDCl}_3$ )  $\delta$  4.4 (q), 86.3 (s), 102.3 (s), 115.8 (d), 118.8 (d), 119.1 (s), 122.9 (s), 128.7 (d), 128.9 (2d), 130.3 (d), 131.9 (2d), 138.7 (s), 144.5 (s); IR  $\nu_{\text{max}}$  (neat) 3475 (N-H), 3384 (N-H), 3052 (C-H), 2984 (C-H), 2359 (CC), 1888 (comb),

1616 (C=C), 1472, 817, 738, 704  $\text{cm}^{-1}$ ;  $m/z$  ( $\text{EI}^+$ ) (rel. intensity) 207 ( $\text{M}^+$ , 100), 167 (40), 149 (85), 57 (65); HRMS ( $\text{EI}^+$ ) calc'd. for  $\text{C}_{15}\text{H}_{13}\text{N}$  ( $\text{M}^+$ ) 207.1048, found 207.1050,  $\Delta$  -1.0 ppm.

**2-Chloro-*N*-(4'-prop-1-ynylbiphenyl-2-yl)nicotinamide 17**<sup>19</sup>

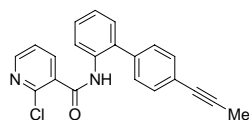

To a solution of *biphenylamine* **13** (4.5 mg, 0.022 mmol) in  $\text{CH}_2\text{Cl}_2$  (5 mL) was added 2-chloro-3-nicotinic acid (6.9 mg, 0.042 mmol), DMAP (0.5 mg, 0.004 mmol) and DCC (10.0 mg, 0.048 mmol) and the reaction mixture was stirred for 16 h. A sat. solution of  $\text{K}_2\text{CO}_3$  was added and the reaction mixture was partitioned between  $\text{Et}_2\text{O}$  (40.0 mL) and water (10.0 mL). The phases were separated, the aqueous phase extracted with  $\text{CH}_2\text{Cl}_2$  ( $2 \times 10.0$  mL) and the combined organic extracts were dried over  $\text{MgSO}_4$ . Purification by FC (hexane/ $\text{EtOAc}$ , 70/30) gave *biarylalkyne* **17** as a colourless oil (4.4 mg, 59%).  $^1\text{H}$  NMR (400 MHz;  $\text{CDCl}_3$ ):  $\delta$  2.07 (s, 3H,  $\text{CH}_3$ ), 7.27 (d,  $J = 6.5$  Hz, 2H, ArH), 7.33-7.39 (m, 3H, ArH), 7.46 (td,  $J = 8.4, 1.6$  Hz, 1H, ArH), 7.50 (d,  $J = 8.2$  Hz, 2H, ArH), 8.12 (dd,  $J = 7.5, 1.9$  Hz, 1H, ArH), 8.15 (brs, 1H, NH), 8.42-8.44 (m, 2H, ArH);  $^{13}\text{C}$  NMR (100 MHz;  $\text{CDCl}_3$ )  $\delta$  4.3 (q), 86.2 (s), 93.1 (s), 121.6 (d), 122.8 (d), 122.9 (s), 125.0 (d), 128.0 (d), 129.2 (2d), 130.1 (d), 131.0 (s), 132.2 (2d), 132.4 (s), 134.3 (s), 137.4 (s), 140.0 (d), 146.5 (s), 151.1 (d), 162.3 (s); IR  $\nu_{\text{max}}$  (neat) 3325 (N-H), 3053 (C-H), 2935 (C-H), 2305 (CC), 1654 (C=O), 1580 (C=C), 1265, 735  $\text{cm}^{-1}$ ;  $m/z$  ( $\text{CI}^+$ ) (rel. intensity) 349 [ $\text{M}^{(37}\text{Cl})\text{H}^+$ , 5], 347 [ $\text{M}^{(35}\text{Cl})\text{H}^+$ , 15], 328 (40), 225 (100); HRMS ( $\text{CI}^+$ ) calc'd. for  $\text{C}_{21}\text{H}_{16}^{35}\text{ClN}_2\text{O}$  ( $\text{MH}^+$ ) 347.0951, found 347.0952,  $\Delta$  1.3 ppm.

**(3,3,4,4,5,5,6,6,7,7,8,8,9,9,10,10,10-Heptafluorodecyl)bis(naphthalen-2-ylmethyl){4-[(3-methyl-3-methoxybutynyl)phenyl]}germane 9**

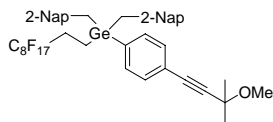

Using conditions adapted from those of Corey,<sup>25</sup>  $\text{NaH}$  (4 mg, 0.1 mmol, 60% in mineral oil) was added to a solution of *alkynylgermane* **8** (32 mg, 0.0333 mmol) in THF (10 mL) and the reaction mixture stirred at RT for 1 h. Dimethylsulfate (9.5  $\mu\text{L}$ , 0.1 mmol) was then added and the reaction mixture was stirred at Rt for a further 16 h. The resulting reaction mixture was then diluted with  $\text{Et}_2\text{O}$  (20.0 mL), washed with water ( $3 \times 10.0$  mL) and the organic phase was dried over  $\text{MgSO}_4$  and concentrated *in vacuo*. Purification by FC (hexane/ $\text{EtOAc}$ , 95/5) gave *alkynylgermane* **9** as pale yellow oil (28.3 mg, 87%).  $^1\text{H}$  NMR (400 MHz;  $\text{CDCl}_3$ ):  $\delta$  1.16 (m, 2H,  $\text{CH}_2\text{CH}_2\text{Ge}$ ), 1.59 (s, 6H,  $\text{CC}(\text{CH}_3)_2\text{OCH}_3$ ), 1.83 (m, 2H,  $\text{CH}_2\text{CH}_2\text{Ge}$ ), 2.73 (s, 4H,  $2 \times \text{GeCH}_2\text{Nap}$ ), 3.47 (s, 3H,  $\text{CC}(\text{CH}_3)_2\text{OCH}_3$ ), 7.04 (dd,  $J = 8.4, 1.8$  Hz, 2H, ArH), 7.25-7.29 (m, 2H, ArH), 7.34-7.50 (m, 8H, ArH), 7.63 (d,  $J = 7.7$  Hz, 2H, ArH), 7.68 (d,  $J = 8.4$  Hz, 2H, ArH), 7.78 (d,  $J = 7.7$  Hz, 2H, ArH);  $^{13}\text{C}$  NMR (100 MHz;  $\text{CDCl}_3$ )  $\delta$  1.8 (t), 22.4 (2t), 26.2 (t,  $J_{\text{CF}} 23.0$  Hz), 29.7 (2q), 51.7 (q), 70.9 (s), 83.9 (s), 92.1 (s), 108.2 (s), 110.2 (s), 110.6 (2s), 110.94 (2s), 110.98 (s), 117.9 (s), 123.7 (s), 124.9 (2d), 125.7 (2d), 125.8 (s), 126.1 (2d), 127.0 (2d), 127.3 (2d), 127.6 (2d), 128.1 (2d), 131.27 (2s), 131.35 (2d), 133.7 (2d+s), 136.2 (2s), 137.0 (s);  $^{19}\text{F}$  NMR (376 MHz;  $\text{C}_6\text{D}_6$ ):  $\delta$  -125.1 (s, 2F), -122.6 (s, 2F), -121.8 (s, 2F), -121.0 (m, 6F), -115.4 [quintet,  $J = 14.6$  Hz, 2F,  $(\text{CF}_2)_6\text{CF}_2\text{CF}_3$ ], -79.8 [t,  $J = 9.9$  Hz, 3F,  $(\text{CF}_2)_6\text{CF}_2\text{CF}_3$ ]; IR  $\nu_{\text{max}}$  (neat) 3054 (C-H), 2985 (C-H), 2360 (CC), 1605 (C=C), 1420 (C-F), 912, 740  $\text{cm}^{-1}$ ;  $m/z$  ( $\text{FAB}^+$ ) (rel. intensity) 835 [ $(\text{M-NapCH}_2)^+$ , 60], 551 (60), 537 (50),

279 (60), 141 (100); HRMS (FAB<sup>+</sup>) calc'd. for C<sub>33</sub>H<sub>26</sub>F<sub>17</sub>O<sup>74</sup>Ge [M-(NapCH<sub>2</sub>)<sup>+</sup>] 835.0918, found 835.0913, Δ - 0.7 ppm.

#### 4-(3-Methyl-3-methoxybutynyl)-2'-nitrobiphenyl **14**

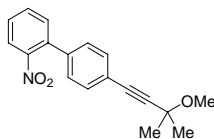

Using the *typical method*, the crude difluoroarylgermane from the photolysis of *arylgermane 9* (48.9 mg, 0.067 mmol), TBAF (63.0 mg, 0.2 mmol), PdCl<sub>2</sub>(MeCN)<sub>2</sub> (2 mg, 0.0077 mmol), P(2-Tol)<sub>3</sub> (3.5 mg, 0.012 mmol), 2-bromonitrobenzene (27 mg, 0.134 mmol) and CuI (13.3 mg, 0.067 mmol) were employed. Purification by FC (hexane/EtOAc, 90/10) gave *nitrobiphenyl 14* as a yellow oil (9.9 mg, 50%). <sup>1</sup>H NMR (400 MHz; CDCl<sub>3</sub>): δ 1.56 (s, 6H, 2 × CH<sub>3</sub>), 3.44 (s, 3H, OCH<sub>3</sub>), 7.27 (d, *J* = 6.8 Hz, 2H, ArH), 7.42 (dd, *J* = 7.7, 1.3 Hz, 1H, ArH), 7.48-7.50 (m, 3H, ArH), 7.63 (td, *J* = 7.5, 1.1 Hz, 1H, ArH), 7.88 (dd, *J* = 8.1, 1.0 Hz, 1H, ArH); <sup>13</sup>C NMR (100 MHz; CDCl<sub>3</sub>) δ 28.3 (2q), 51.8 (q), 70.9 (s), 83.7 (s), 92.2 (s), 122.9 (s), 124.2 (d), 127.8 (2d), 128.4 (d), 131.8 (d), 131.9 (2d), 132.0 (s), 132.4 (d), 135.7 (s), 137.2 (s); IR ν<sub>max</sub> (neat) 3055 (C-H), 2987 (C-H), 2360 (CC), 1588 (C=C), 1537 (N=O), 1265 (N=O), 896, 738, 704 cm<sup>-1</sup>; *m/z* (EI<sup>+</sup>) (rel. intensity) 295 (M<sup>+</sup>, 20), 289 (50), 280 (100), 264 (30), 198 (30); HRMS (EI<sup>+</sup>) calc'd. for C<sub>18</sub>H<sub>17</sub>NO<sub>3</sub> (M<sup>+</sup>) 295.1208, found 295.1207, Δ -0.5 ppm.

#### 4-(3-Methyl-3-methoxybutynyl)-2'-aminobiphenyl **15**

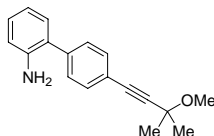

To a solution of *nitrobiphenyl 14* (9.9 mg, 0.034 mmol) in THF-EtOH (1:1, 10 mL) was added tin(II) chloride (63.7 mg, 0.34 mmol) and conc. HC (1 mL) and the reaction mixture was stirred for 16 h. A sat. solution of K<sub>2</sub>CO<sub>3</sub> was added and the reaction mixture was partitioned between Et<sub>2</sub>O (40.0 mL) and water (10.0 mL). The phases were separated, the aqueous phase extracted with CH<sub>2</sub>Cl<sub>2</sub> (2 × 10.0 mL) and the combined organic extracts were dried over MgSO<sub>4</sub>. Purification by FC (hexane/EtOAc, 80/20) gave *4-(3-methyl-3-methoxybutynyl)-2'-aminobiphenyl 15* as a colourless oil (7.1 mg, 80%). <sup>1</sup>H NMR (400 MHz; CDCl<sub>3</sub>): δ 1.56 (s, 6H, 2 × CH<sub>3</sub>), 3.45 (s, 3H, OCH<sub>3</sub>), 3.75 (brs, 2H, NH<sub>2</sub>), 6.77 (dd, *J* = 8.2, 0.7 Hz, 1H, ArH), 6.83 (td, *J* = 7.4, 1.0 Hz, 1H, ArH), 7.11 (dd, *J* = 7.6, 1.5 Hz, 1H, ArH), 7.16 (td, *J* = 7.6, 1.5 Hz, 1H, ArH), 7.42 (d, *J* = 8.3 Hz, 2H, ArH), 7.51 (d, *J* = 8.3 Hz, 2H, ArH); <sup>13</sup>C NMR (100 MHz; CDCl<sub>3</sub>) δ 28.4 (2q), 51.7 (q), 71.0 (s), 84.0 (s), 91.4 (s), 115.7 (d), 118.8 (d), 121.6 (s), 126.8 (s), 128.8 (d), 129.0 (2d), 130.3 (d), 132.1 (2d), 139.5 (s), 143.3 (s); IR ν<sub>max</sub> (neat) 3475 (N-H), 3382 (N-H), 3052 (C-H), 3021 (C-H), 2280 (CC), 1887 (comb), 1617 (C=C), 1472, 810, 743 cm<sup>-1</sup>; *m/z* (EI<sup>+</sup>) (rel. intensity) 265 (M<sup>+</sup>, 85), 250 (100), 234 (50), 220 (40), 125 (30); HRMS (EI<sup>+</sup>) calc'd. for C<sub>18</sub>H<sub>19</sub>NO (M<sup>+</sup>) 265.1467, found 265.1464, Δ -1.0 ppm.

#### 2-Chloro-N-[4'-(3-methoxy-3-methylbut-1-ynyl)biphenyl-2-yl]nicotinamide **18**<sup>19</sup>

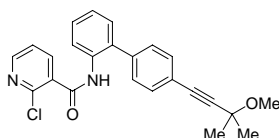

To a solution of biphenylamine **15** (12 mg, 0.045 mmol) in CH<sub>2</sub>Cl<sub>2</sub> (10 mL) was added 2-chloro-3-nicotinic acid (7.2 mg, 0.045 mmol), DMAP (0.6 mg, 0.0049 mmol) and DCC (10.3 mg, 0.050 mmol) and the reaction mixture was stirred for 16 h. A sat. solution of K<sub>2</sub>CO<sub>3</sub> was added to the reaction mixture and the reaction mixture was partitioned between Et<sub>2</sub>O (40.0 mL) and water (10.0 mL). The phases were separated, the aqueous phase extracted with CH<sub>2</sub>Cl<sub>2</sub> (2 × 10.0 mL) and the combined organic extracts were dried over MgSO<sub>4</sub>. Purification by FC (hexane/EtOAc, 70/30) gave biarylalkyne **18** as a colourless oil (12.5 mg, 68%). <sup>1</sup>H NMR (400 MHz; CDCl<sub>3</sub>): δ 1.56 (s, 6H, 2 × CH<sub>3</sub>), 3.44 (s, 3H, OCH<sub>3</sub>), 7.27 (d, *J* = 6.3 Hz, 2H, ArH), 7.34-7.38 (m, 3H, ArH), 7.46 (td, *J* = 8.6, 2.8 Hz, 1H, ArH), 7.52 (d, *J* = 8.2 Hz, 2H, ArH), 8.14 (dd, *J* = 7.7, 1.9 Hz, 1H, ArH), 8.16 (brs, 1H, NH), 8.44-8.46 (m, 2H, ArH); <sup>13</sup>C NMR (100 MHz; CDCl<sub>3</sub>) δ 28.3 (2q), 51.8 (q), 70.9 (s), 83.5 (s), 92.2 (s), 121.8 (d), 122.90 (d), 122.93 (s), 125.2 (d), 128.2 (d), 129.4 (2d), 130.1 (d), 131.1 (s), 132.4 (2d), 132.6 (s), 134.3 (s), 137.6 (s), 140.1 (d), 146.7 (s), 151.3 (d), 162.5 (s); IR ν<sub>max</sub> (neat) 3325 (N-H), 3053 (C-H), 2931 (C-H), 2341 (CC), 1654 (C=O), 1578 (C=C), 1070, 734 cm<sup>-1</sup>; *m/z* (CI<sup>+</sup>) (rel. intensity) 424 [M(<sup>37</sup>Cl)NH<sub>4</sub><sup>+</sup>, 1], 422 [M(<sup>35</sup>Cl)NH<sub>4</sub><sup>+</sup>, 3], 390 (40), 373 (100), 339 (20), 225 (50); HRMS (CI<sup>+</sup>) calc'd. for C<sub>24</sub>H<sub>25</sub><sup>35</sup>ClN<sub>3</sub>O<sub>2</sub> (MNH<sub>4</sub><sup>+</sup>) 422.1635, found 422.1633, Δ -0.5 ppm.

#### Acknowledgement

We thank the EPSRC National Mass Spectrometry Service Centre (Department of Chemistry, University of Wales Swansea, Swansea, Wales, UK) for some of the MS analyses.

#### References

1. W. C. Still, M. Kahn and A. Mitra, *J. Org. Chem.*, 1978, **43**, 2923-2924.
2. A. C. Spivey, C. M. Diaper, H. Adams and A. J. Rudge, *J. Org. Chem.*, 2000, **65**, 5253-5263.
3. S. Shimada, O. Yamazaki, T. Tanaka, M. L. N. Rao, Y. Suzuki and M. Tanaka, *Angew. Chem. Int. Ed.*, 2003, **42**, 1845-1848.
4. M. Dai, B. Liang, C. Wang, J. Chen and Y. Zhen, *Org. Lett.*, 2004, **6**, 221-224.
5. V. Percec, G. M. Golding, J. Smidrkal and O. Weichold, *J. Org. Chem.*, 2004, **69**, 3447-3452.
6. Y. Kobayashi, A. D. William and R. Mizojiri, *J. Organomet. Chem.*, 2002, **653**, 91-97.
7. C. C. Leznoff and R. J. Hayward, *Can. J. Chem.*, 1970, **48**, 1842-1849.
8. Y. Uozumi and Y. Nakai, *Org. Lett.*, 2002, **4**, 2997-3000.
9. H. A. Brune, R. Hess and G. Schmidtberg, *Zeit. Naturfor. B: Anorg. Chem. Org. Chem.*, 1984, **39B**, 1772-1780.
10. M. E. Limmert, A. H. Roy and J. F. Hartwig, *J. Org. Chem.*, 2005, **70**, 9364-9370.
11. Y. Terao, H. Wakui, M. Nomoto, T. Satoh, M. Miura and M. Nomura, *J. Org. Chem.*, 2003, **68**, 5236-5243.
12. N. Kataoka, Q. Shelby, J. P. Stambuli and J. F. Hartwig, *J. Org. Chem.*, 2002, **67**, 5553-5566.
13. R. Cella, R. L. O. R. Cunha, A. E. S. Reis, D. C. Pimenta, C. F. Klitzke and H. A. Stefani, *J. Org. Chem.*, 2006, **71**, 244-250.
14. C. K. Bradsher and L. J. Wissow, *J. Am. Chem. Soc.*, 1946, **68**, 404-405.
15. C. Shih, D. H. Hey and G. H. Williams, *J. Chem. Soc.*, 1958, 1885-1889.
16. L. Liu, Y. Zhang and B. Xin, *J. Org. Chem.*, 2006, **71**, 3994 - 3997.

Supplementary Material (ESI) for Chemical Communications  
This journal is (c) The Royal Society of Chemistry 2007

17. C. M. DiBlasi, D. E. Macks and D. S. Tan, *Org. Lett.*, 2005, **7**, 1777-1780.
18. P. J. Murray, C. Kay, J. J. Scicinski, S. C. McKeown, S. P. Watson and R. A. E. Carr, *Tetrahedron Lett.*, 1999, **40**, 5609-5612.
19. J. Ehrenfreund, C. Lamberth, H. Tobler and H. Walter, *WO 2004/058723 (15 Jul 2004)*, 2004.
20. L. J. Goossen, G. Deng and L. M. Levy, *Science*, 2006, **313**, 662-664.
21. G. Menchi, A. Scrivanti and U. Matteoli, *J. Mol. Catal. A*, 2000, **152**, 77-82.
22. A. Ernst, L. Gobbi and A. Vasella, *Tetrahedron Lett.*, 1996, **37**, 7959-7962.
23. S. J. Harris and D. R. M. Walton, *Tetrahedron*, 1978, **34**, 1037-1042.
24. K. S. Feldman and D. A. Mareska, *J. Org. Chem.*, 1999, **64**, 5650-5660.
25. E. J. Corey, S. Kim, S.-E. Yoo, K. C. Nicolaou, L. S. Melvin, J. D. J. Brunelle, J. R. Falck, E. J. Trybulski, P. Lett and P. W. Sheldrake, *J. Am. Chem. Soc.*, 1978, **100**, 4620-4622.



Supplementary Material (ESI) for Chemical Communications  
This journal is (c) The Royal Society of Chemistry 2007

$^1\text{H}$  NMR, 400 MHz,  $\text{CDCl}_3$

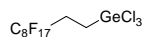

01q452h1 Joseph Mannik 10979\_10  
Standard H1 parameters  
puls1 run with gradient before acquisition  
  
Inova-400 spectrometer  
JOB NO: 206914  
Sample Location 876  
Solvent: Chloroform  
Total time 1.3 min  
Acquired on Apr 16 2005  
Plotted at 10:49

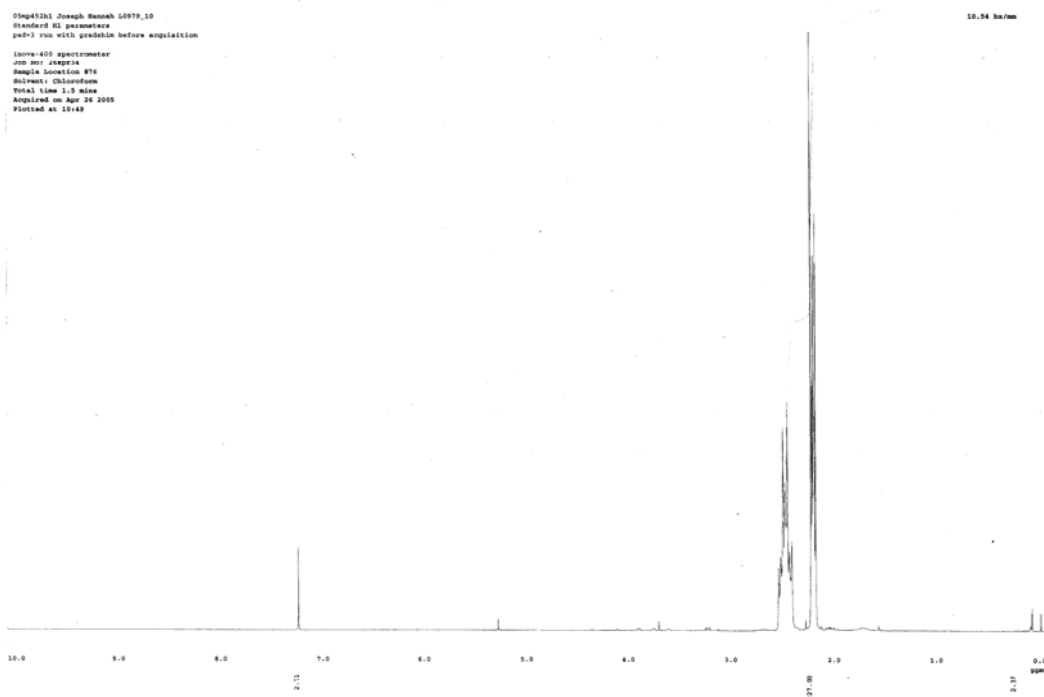

$^{13}\text{C}$  NMR 100 MHz  $\text{CDCl}_3$

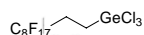

01q452h2 Joseph Mannik 10979\_10  
Standard C13 parameters  
  
Pulse Sequence: s2pul  
Sample Location #20  
File: 01q452h2  
Directory: /data/service/carbon  
Inova-400 "Inova400"  
  
Solvent: Chloroform  
Solvent Temperature  
PULSE SEQUENCE  
Relax: delay 0.100 sec  
Pulse 44.7 Degree  
Acq. time 0.050 sec  
Width 20157.3 Hz  
1024 repetitions  
CARRIER C13: 100.6264559 MHz  
NUC13CP13 H1: 399.8042237 MHz  
Power 10 dB  
on during acquisition  
off during delay  
ANALYSIS SUBMITTED  
DATA PROCESSING  
Time Accumulated 1.3 min  
F1 file 131573  
Total time 24.6 min  
Acquired on Apr 16 2005  
Plotted at 10:44

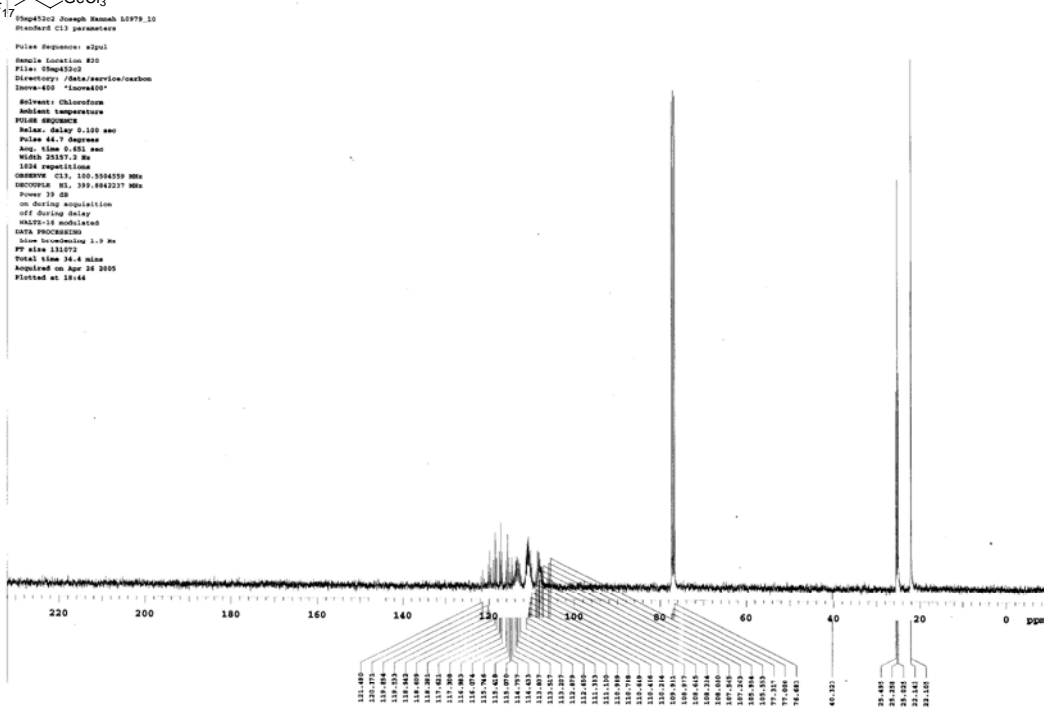

Supplementary Material (ESI) for Chemical Communications  
 This journal is (c) The Royal Society of Chemistry 2007

$^{19}\text{F}$  NMR, 376 MHz,  $\text{CDCl}_3$ .

C8F17   $\text{GeCl}_3$   
 Standard F19 parameters  
 pulse prog: zgpg30  
 Pulse Sequence: zgpg30  
 Sample Location: #76  
 File: 05ap44921  
 Directory: /data/service/multi  
 Inova-400 "Inova400"  
 Solvent: Chloroform  
 Solvent Temperature  
 PULSE SEQUENCE  
 Pulse delay: 2.000 sec  
 Pulse: 45.0 degrees  
 Acq. time: 0.174 sec  
 NS/DS: 3217/4.00  
 16 repetitions  
 CHANNEL F19: 376.3632036 MHz  
 DATA PROCESSING  
 Size: 65536  
 Shifted by: -0.174 sec  
 FT size: 65536  
 Total time: 0.13 min  
 Acquired on: Apr 28 2009  
 Plotted at: 12:29

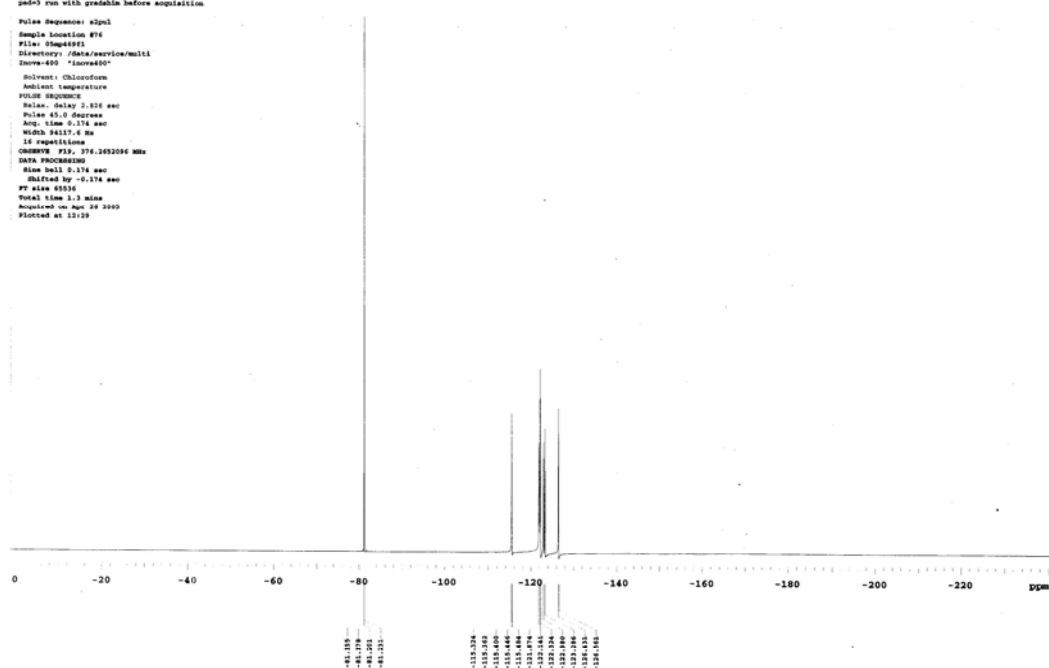

$^1\text{H}$  NMR, 400 MHz,  $\text{CDCl}_3$

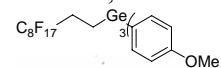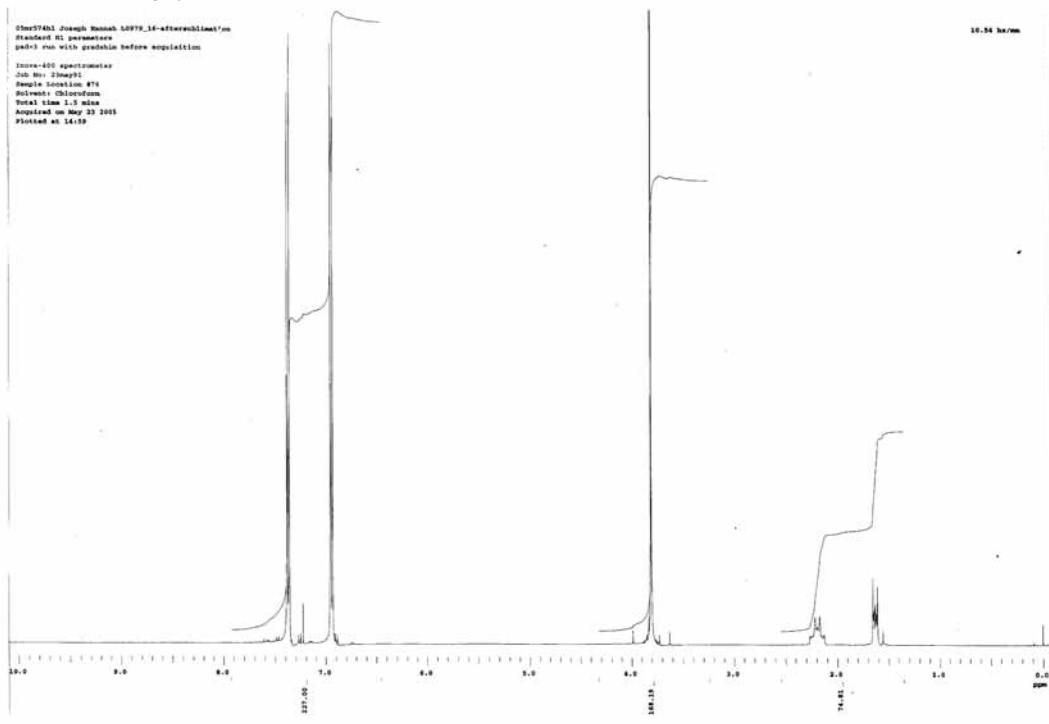

Supplementary Material (ESI) for Chemical Communications  
This journal is (c) The Royal Society of Chemistry 2007

$^{13}\text{C}$  NMR, 100 MHz,  $\text{CDCl}_3$

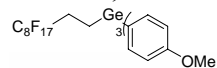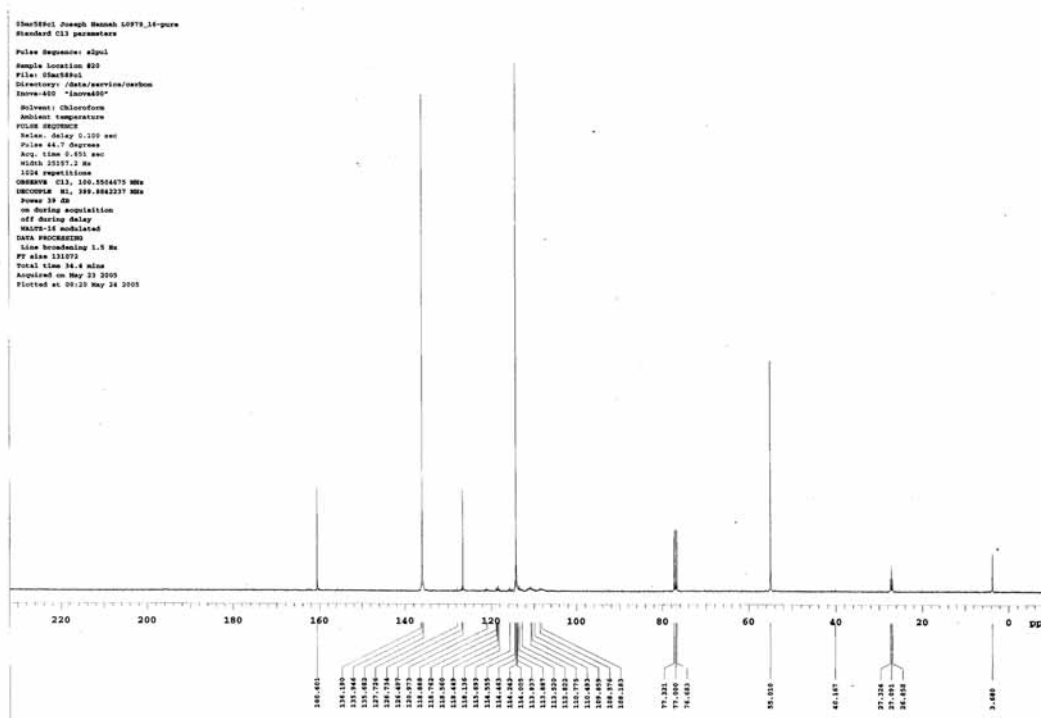

$^{19}\text{F}$  NMR, 376 MHz,  $\text{CDCl}_3$

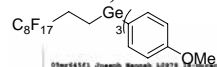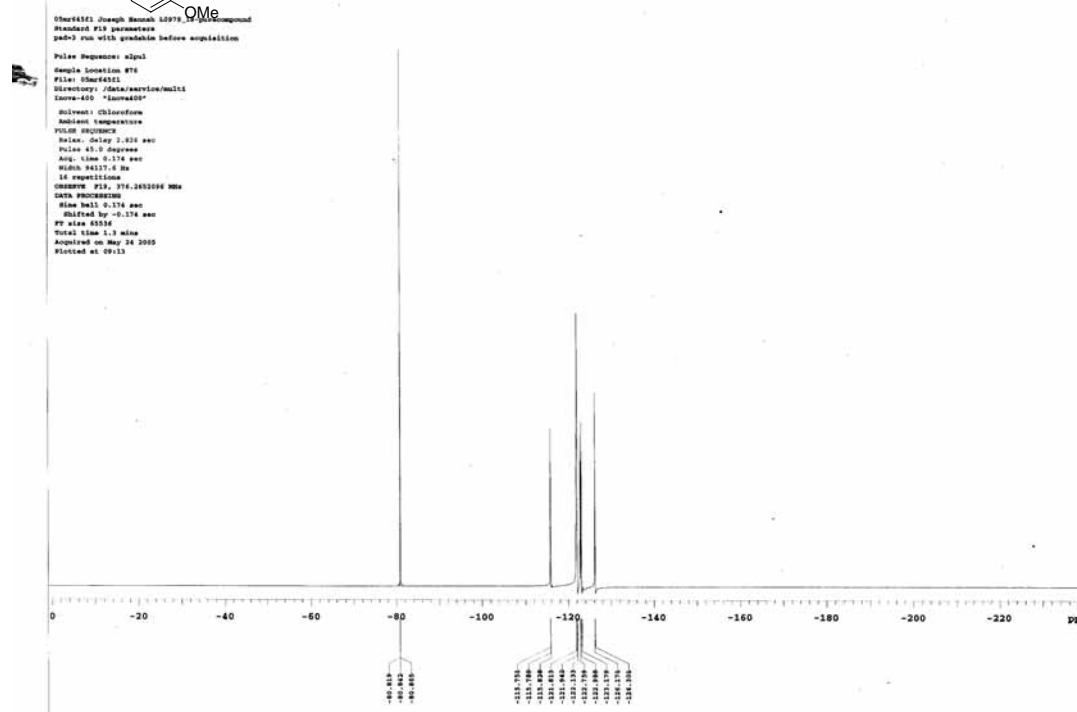

Supplementary Material (ESI) for Chemical Communications  
This journal is (c) The Royal Society of Chemistry 2007

$^1\text{H}$  NMR, 400 MHz,  $\text{CDCl}_3$

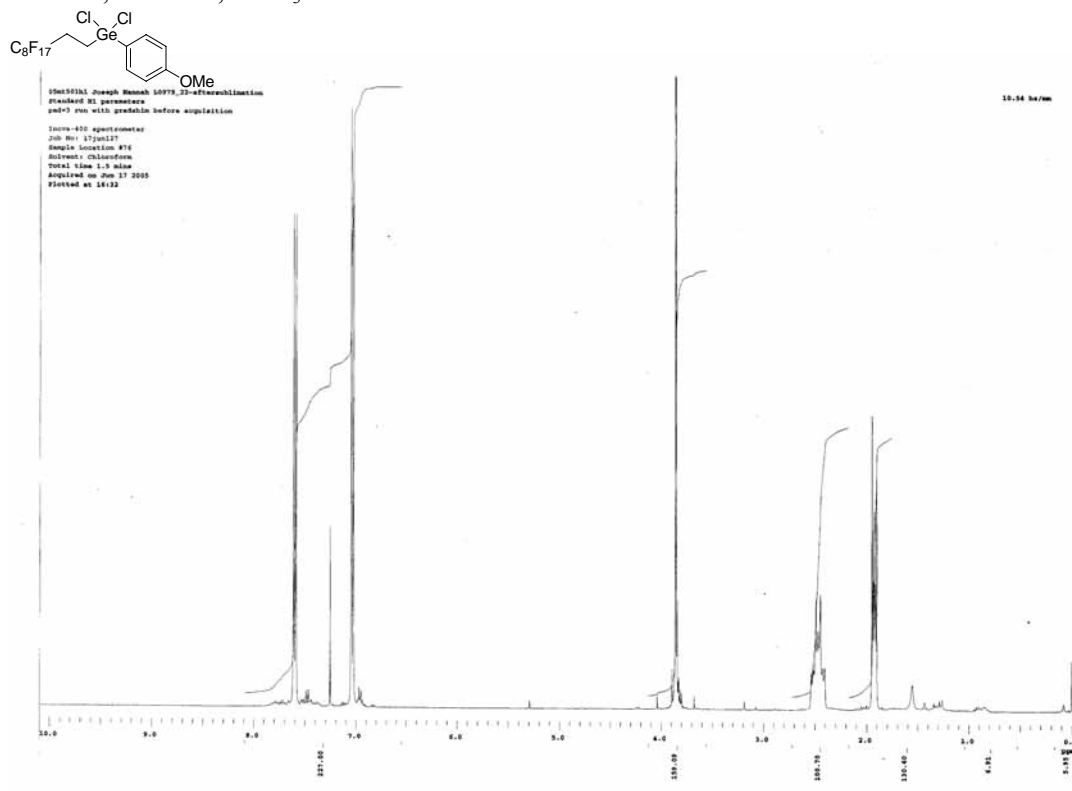

$^{13}\text{C}$  NMR, 100 MHz,  $\text{CDCl}_3$

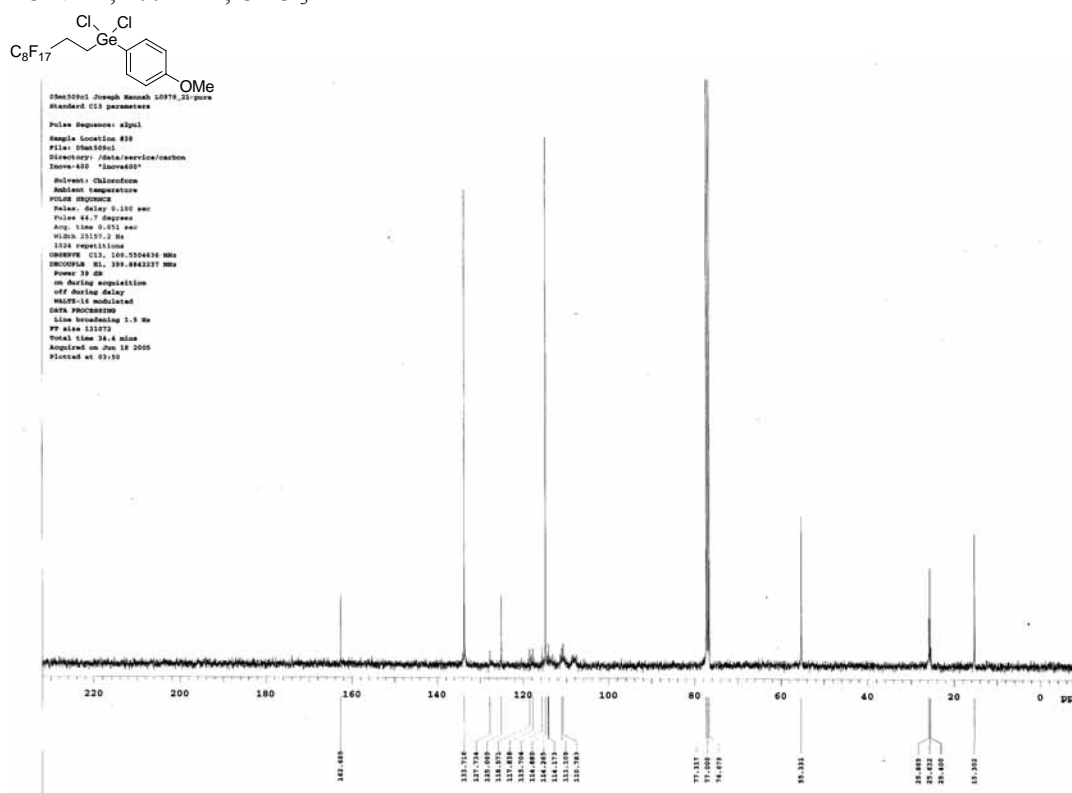



Supplementary Material (ESI) for Chemical Communications  
This journal is (c) The Royal Society of Chemistry 2007

$^{13}\text{C}$  NMR, 100 MHz,  $\text{CDCl}_3$

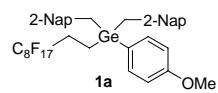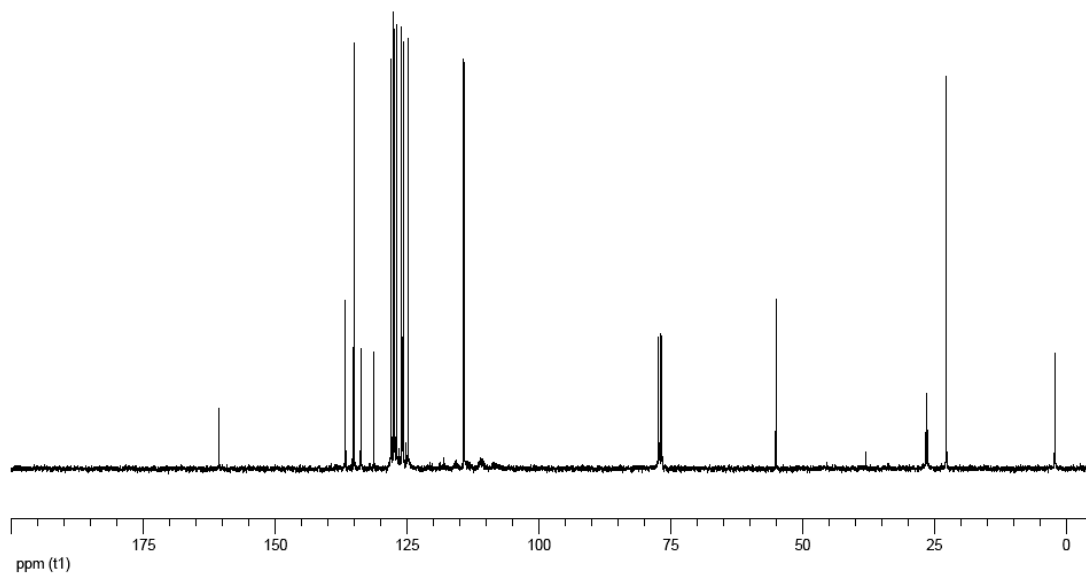

DEPT 135 100 MHz,  $\text{CDCl}_3$

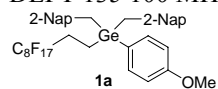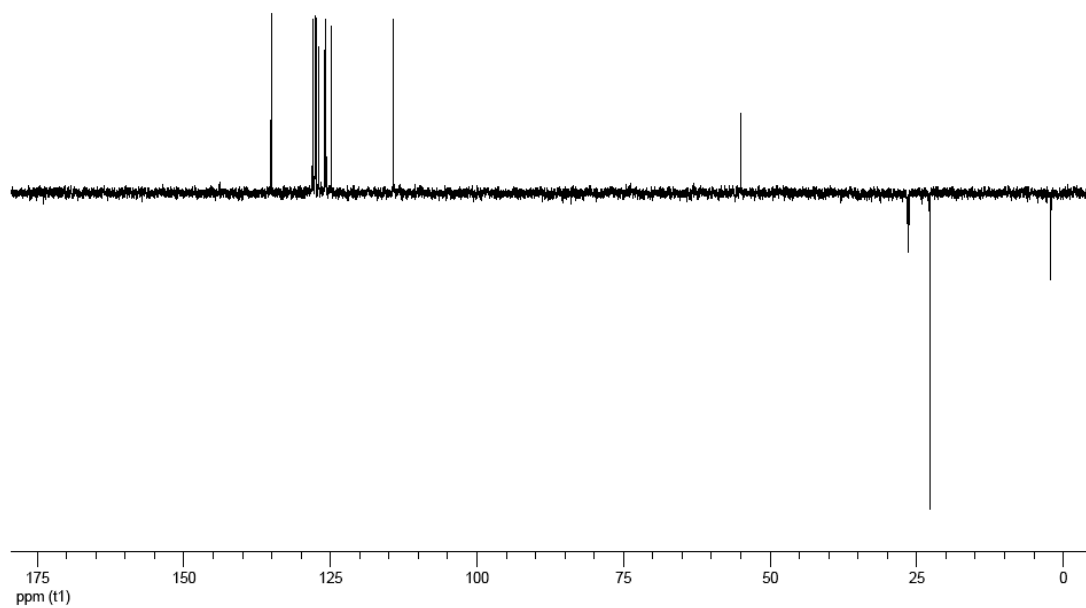

$^{19}\text{F}$  NMR, 376 MHz,  $\text{CDCl}_3$

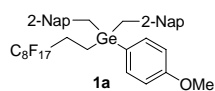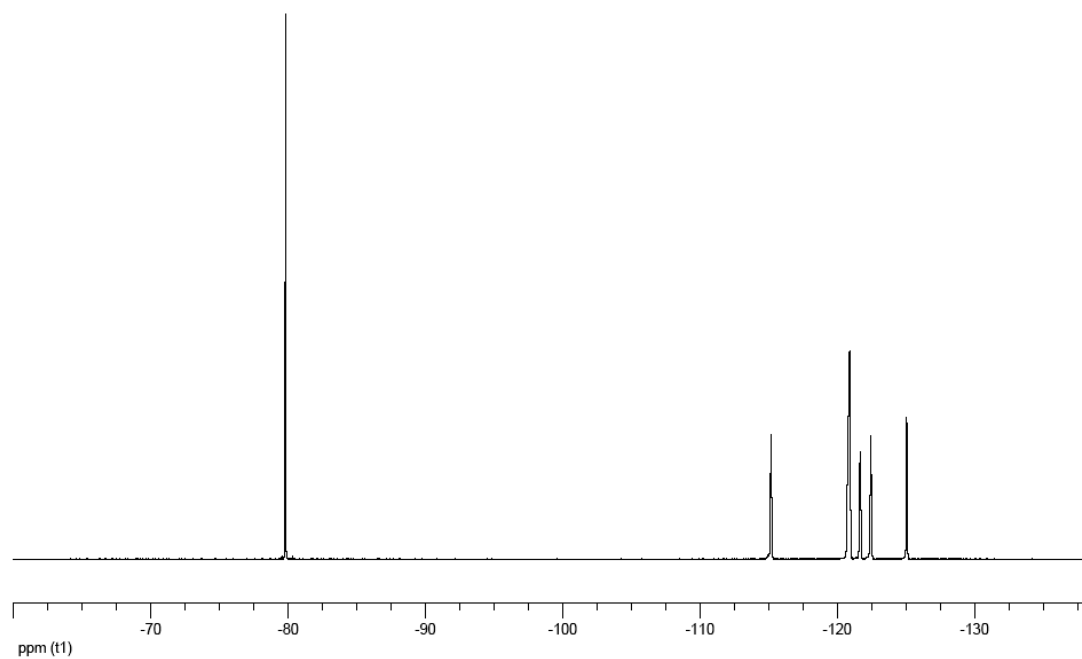

$^{13}\text{C}$  NMR, 100 MHz, decoupled at -125.1 ppm  $\text{CDCl}_3$

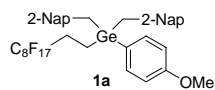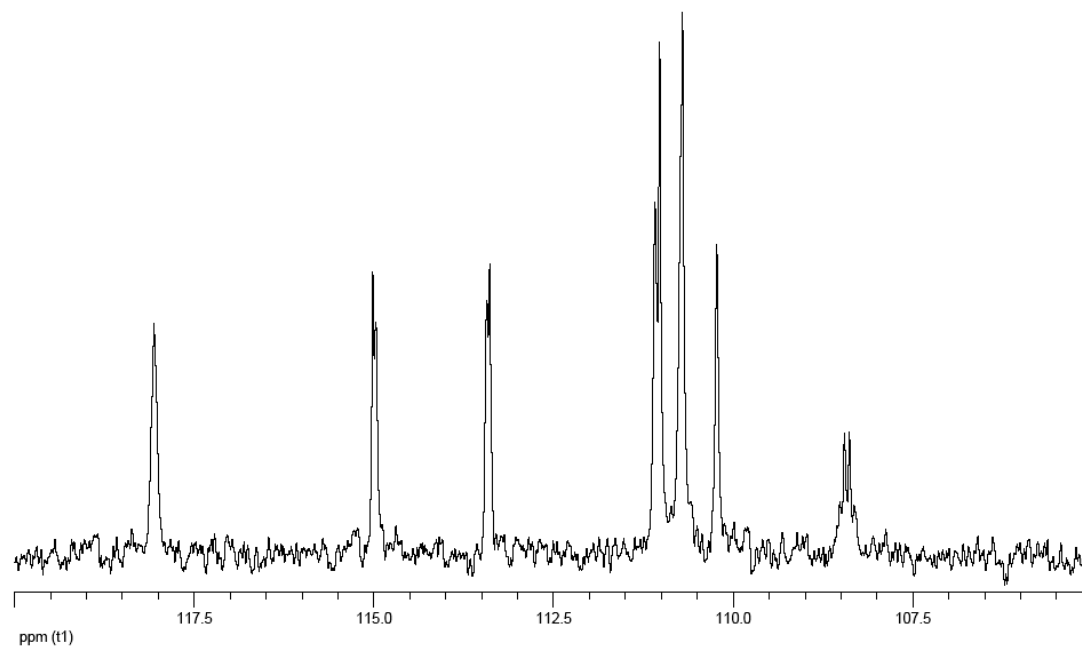

$^1\text{H}$  NMR, 400 MHz,  $\text{CDCl}_3$

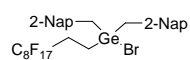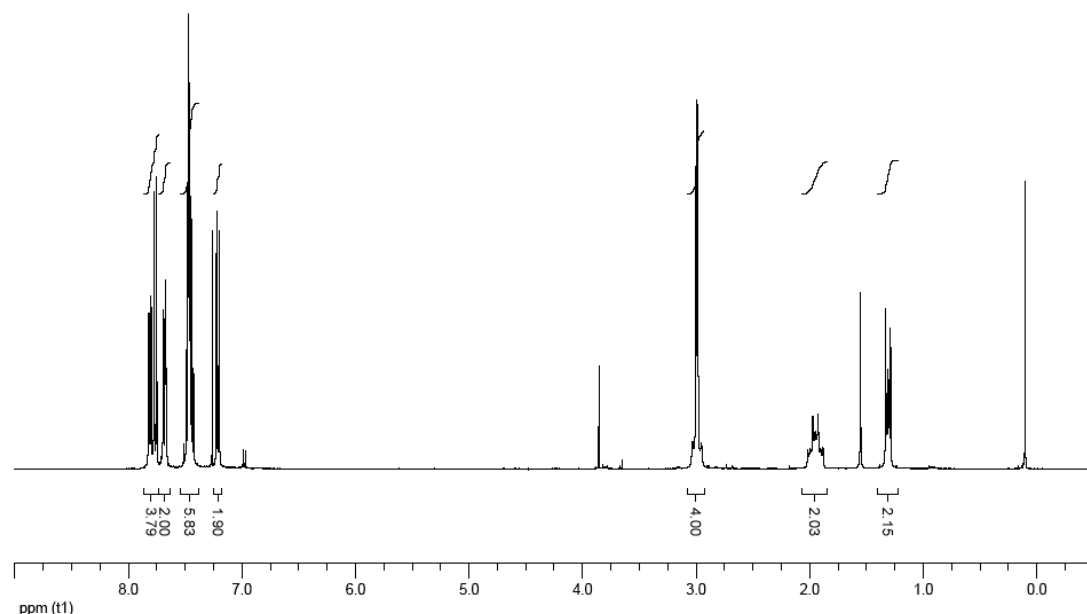

$^{13}\text{C}$  NMR, 100 MHz,  $\text{CDCl}_3$

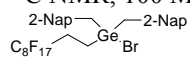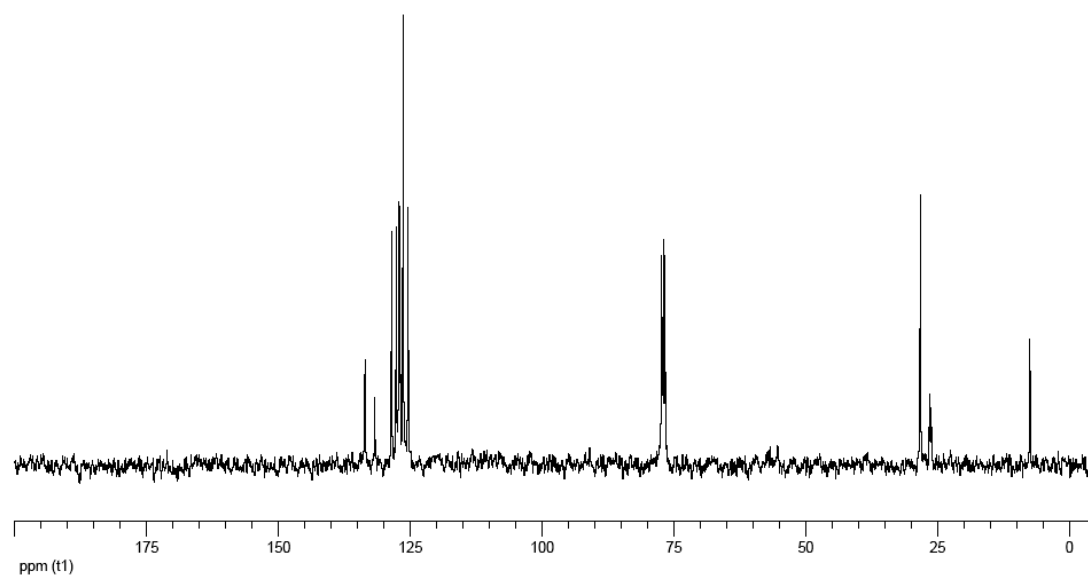



DEPT 135 100 MHz, CDCl<sub>3</sub>

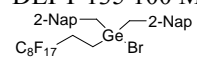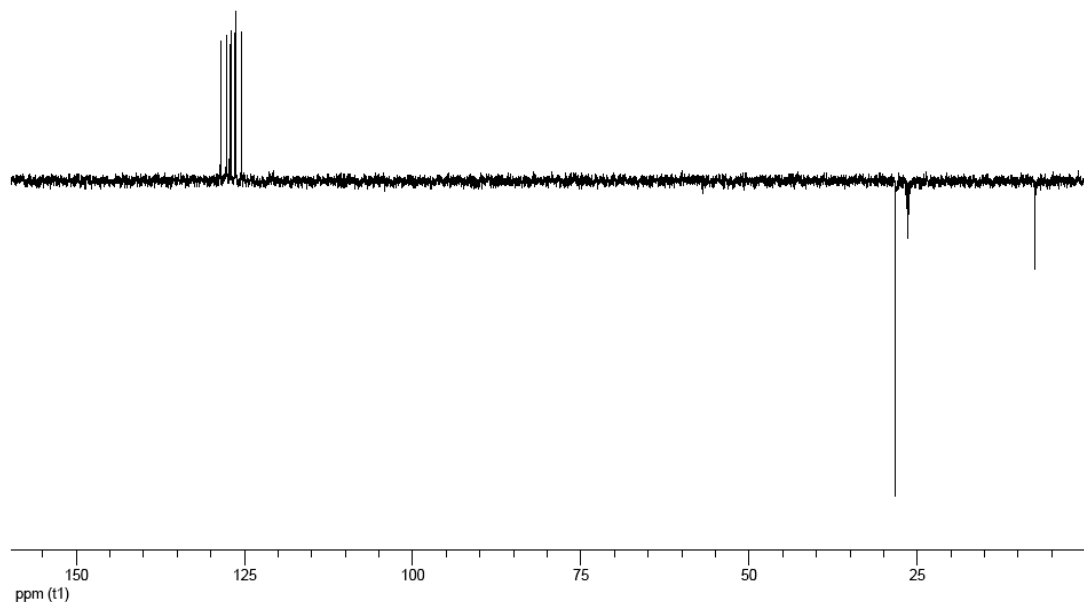

<sup>1</sup>H NMR, 400 MHz, CDCl<sub>3</sub>

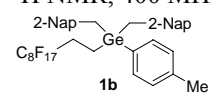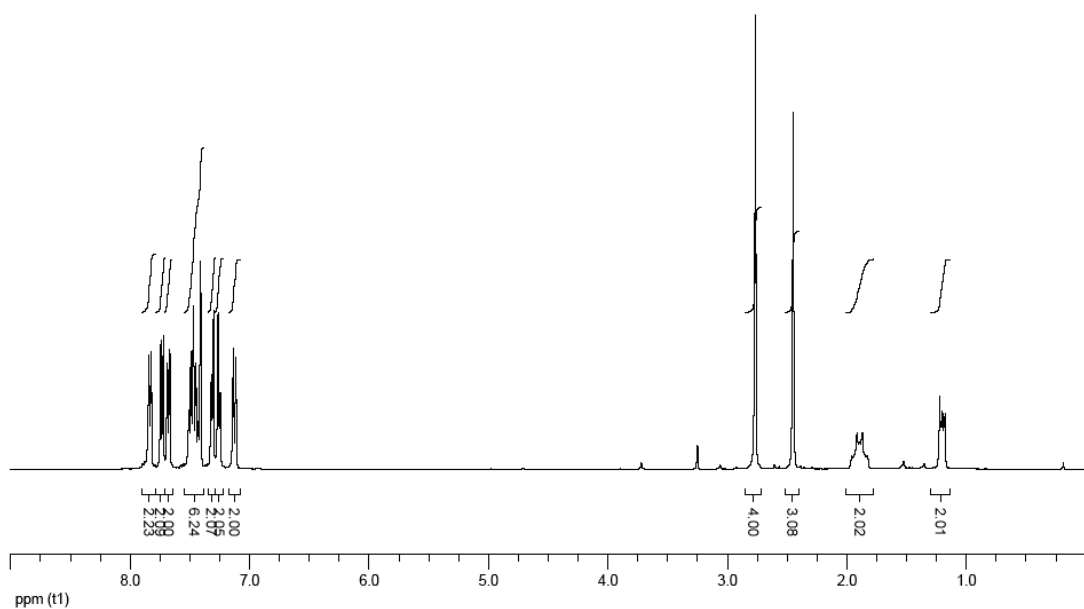

$^{13}\text{C}$  NMR, 100 MHz,  $\text{CDCl}_3$

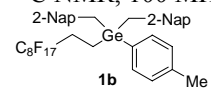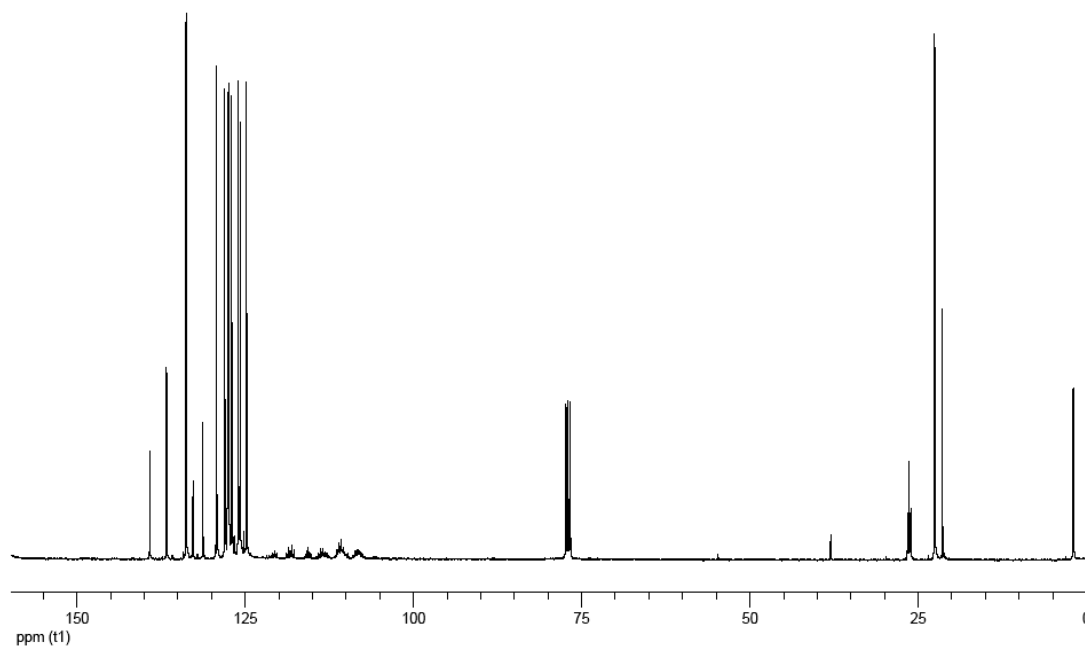

DEPT 135 100 MHz,  $\text{CDCl}_3$

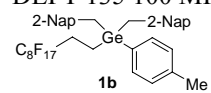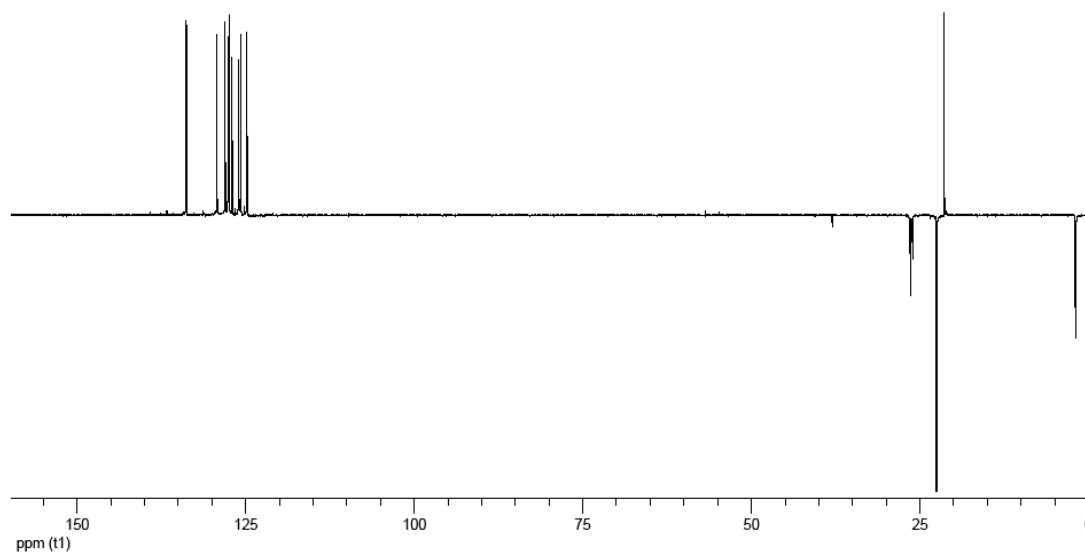

$^1\text{H}$  NMR, 400 MHz,  $\text{CDCl}_3$

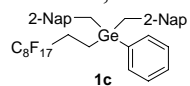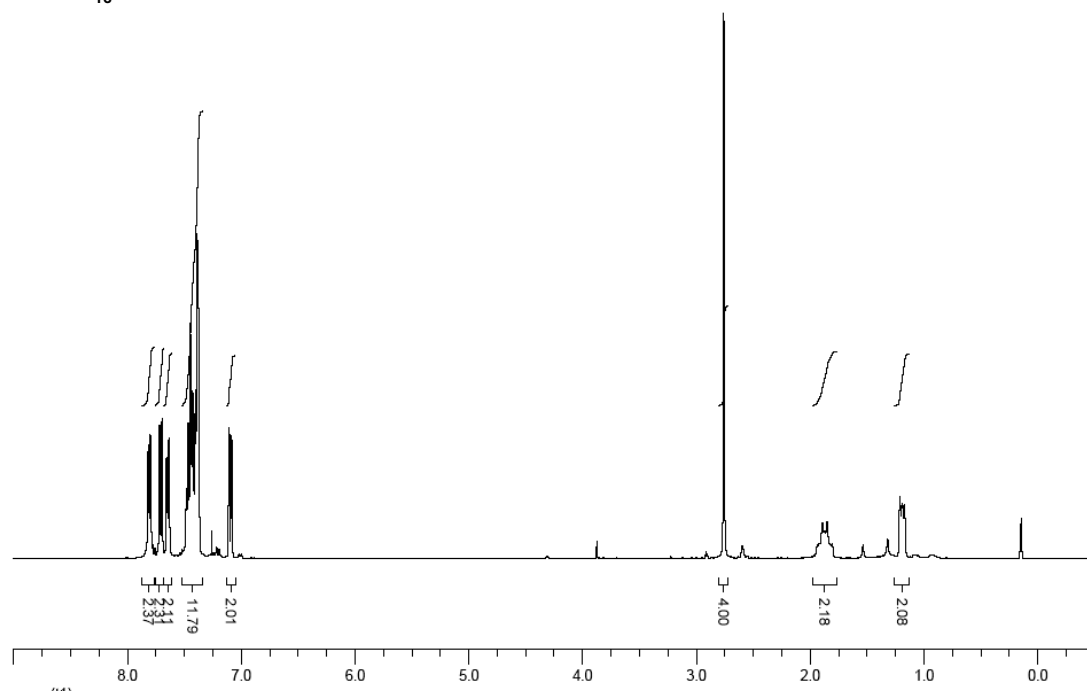

$^{13}\text{C}$  NMR, 100 MHz,  $\text{CDCl}_3$

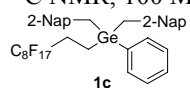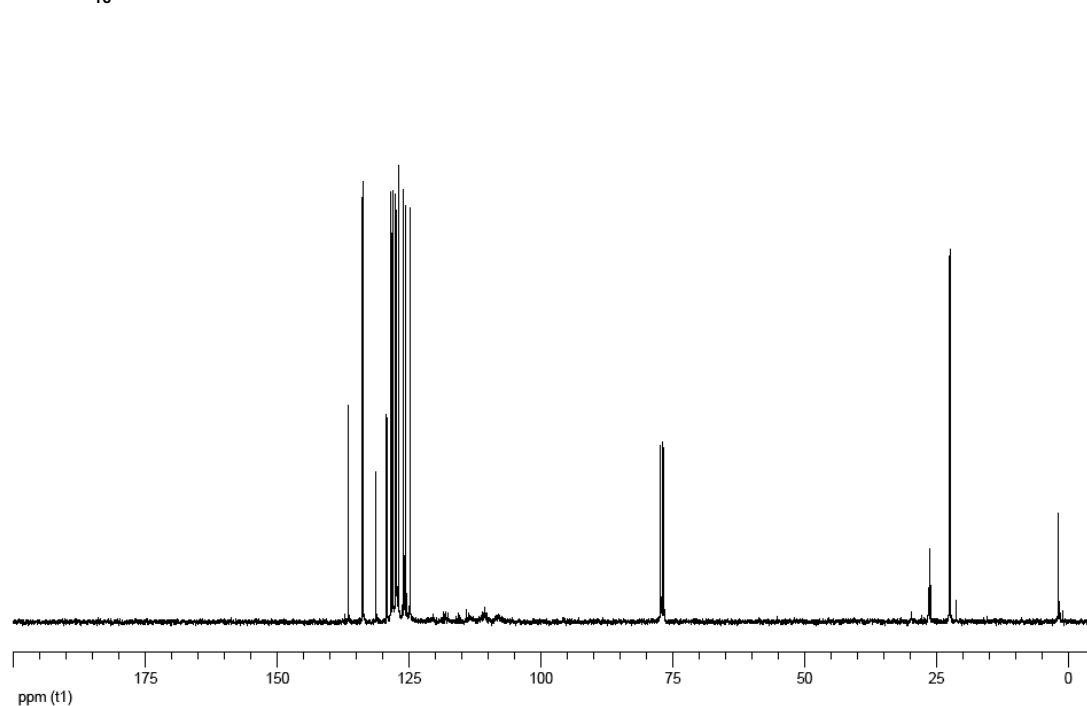

DEPT 135 100 MHz, CDCl<sub>3</sub>

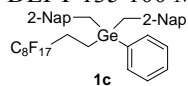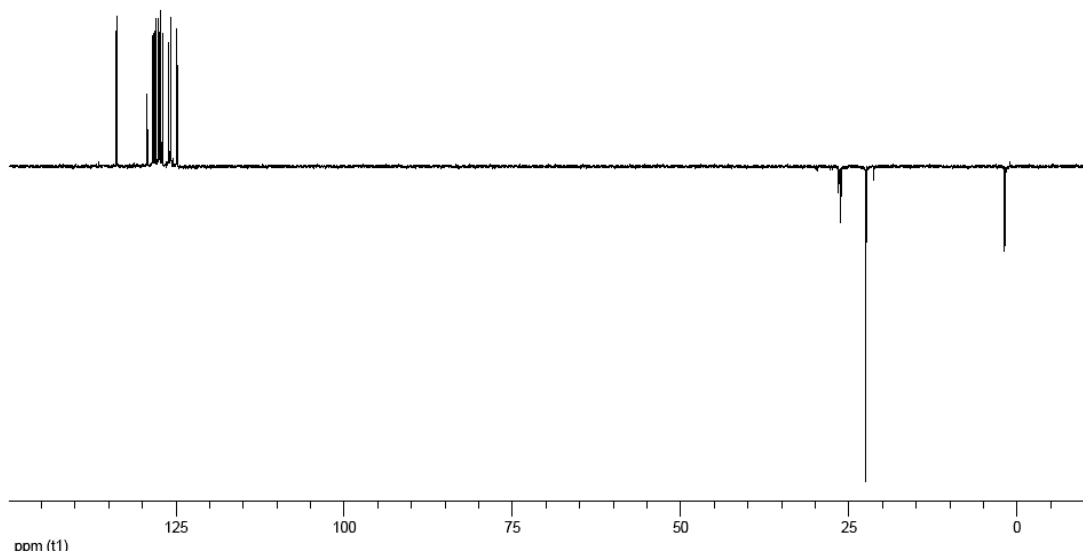

<sup>1</sup>H NMR, 400 MHz, CDCl<sub>3</sub>

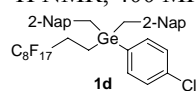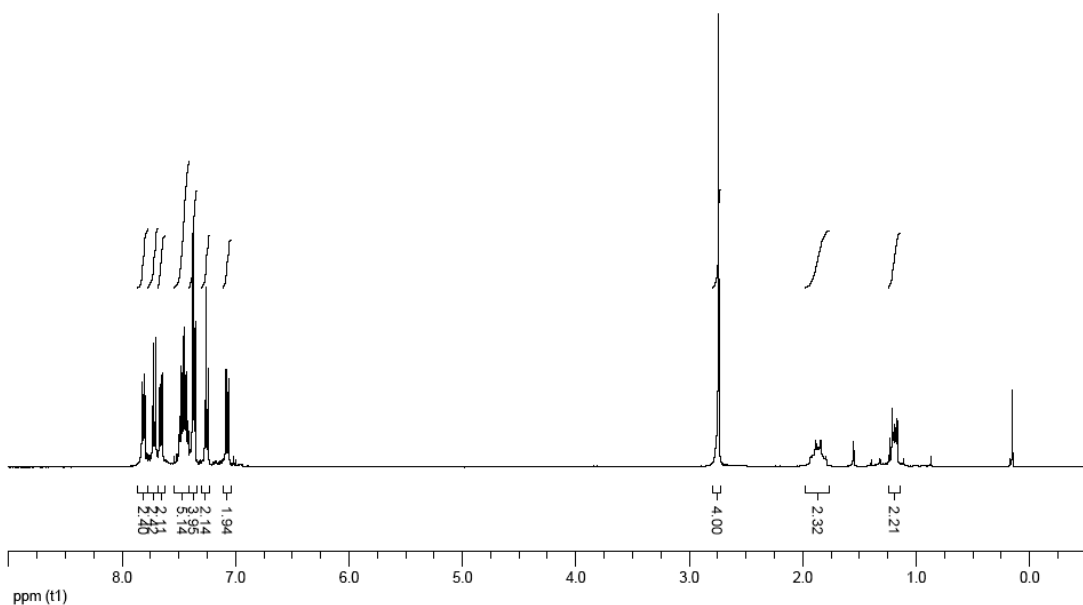

$^{13}\text{C}$  NMR, 100 MHz,  $\text{CDCl}_3$

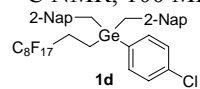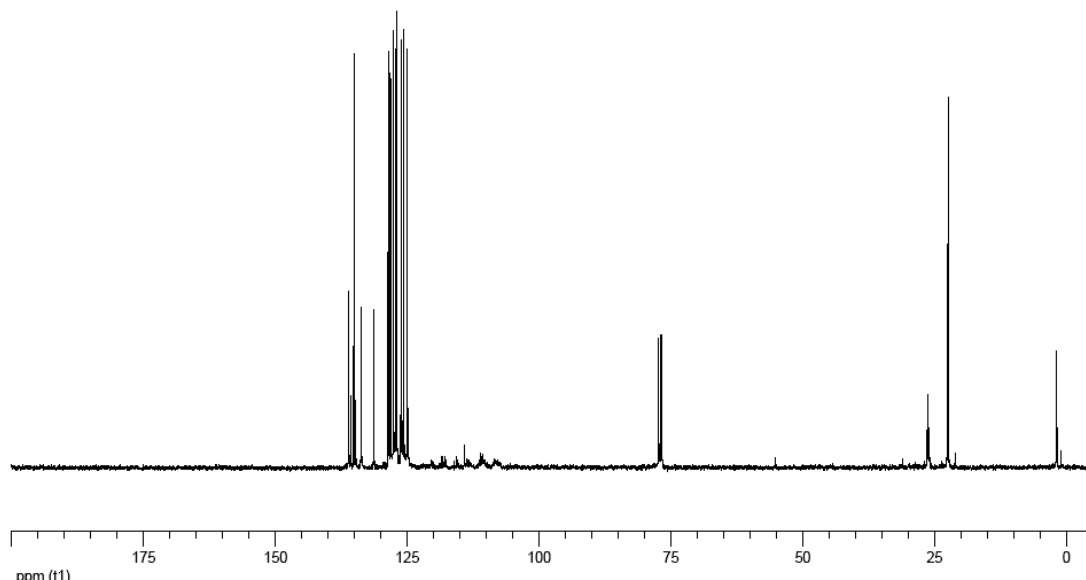

$^1\text{H}$  NMR, 400 MHz,  $\text{CDCl}_3$

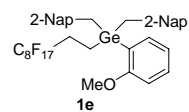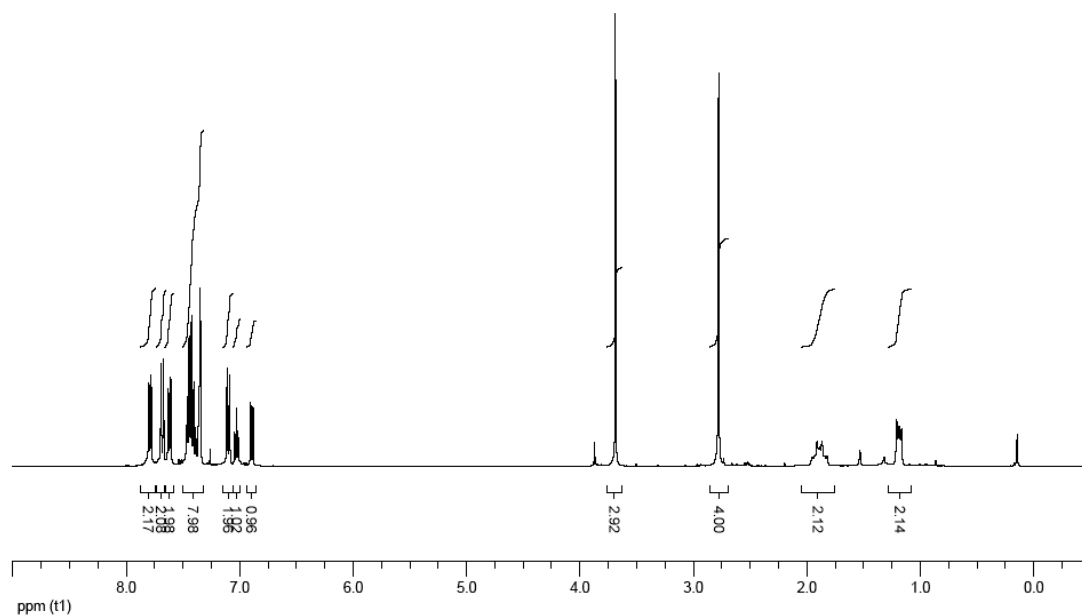

$^{13}\text{C}$  NMR, 100 MHz,  $\text{CDCl}_3$

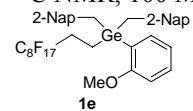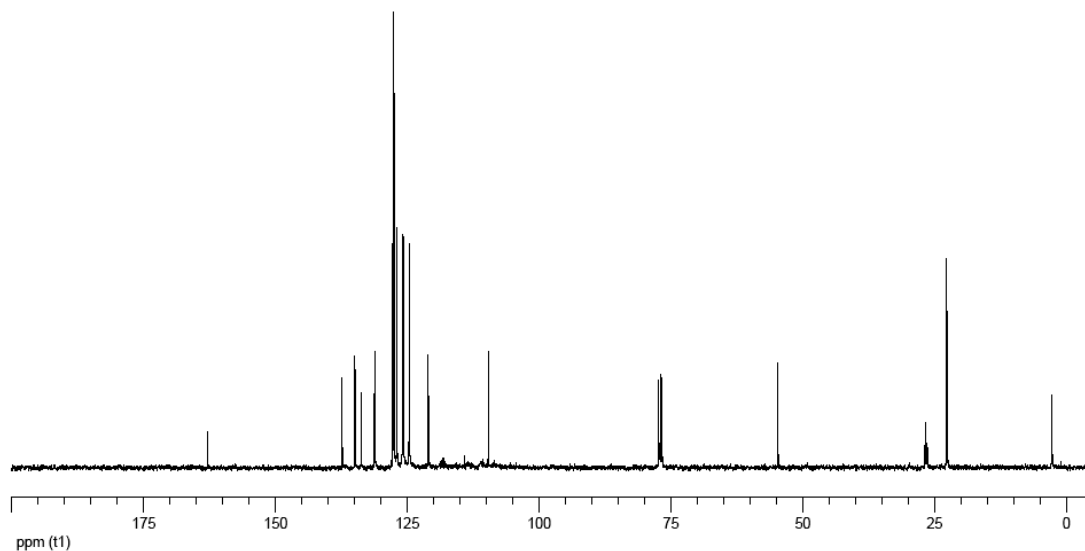

DEPT 135 100 MHz,  $\text{CDCl}_3$

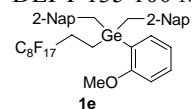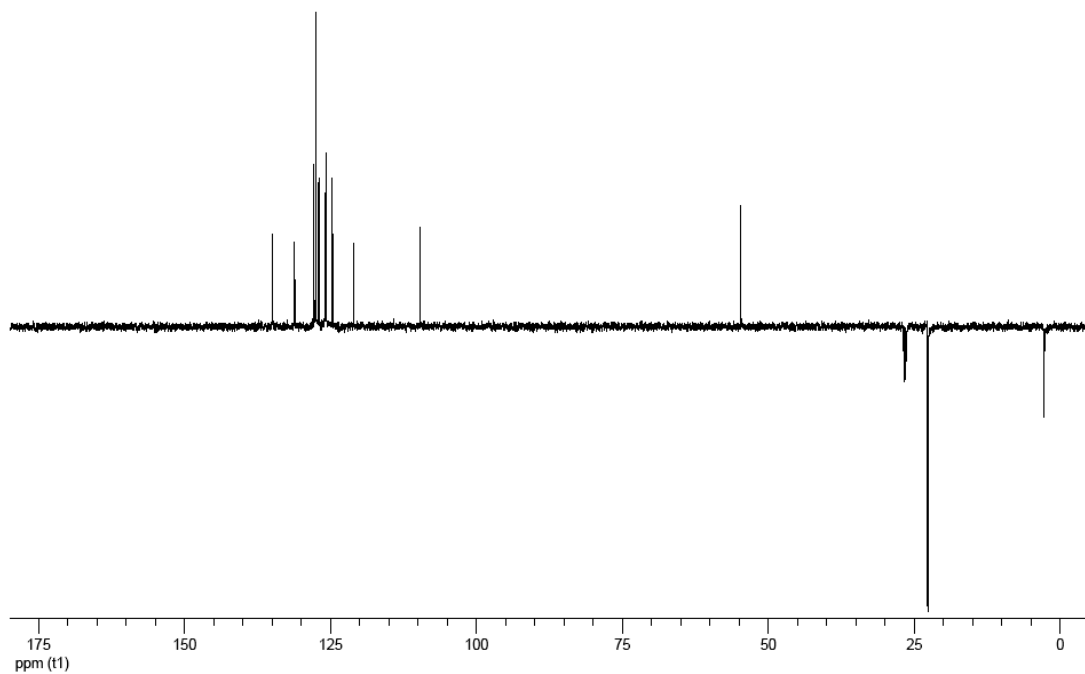

$^1\text{H}$  NMR, 400 MHz,  $\text{CDCl}_3$

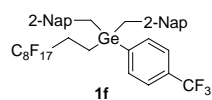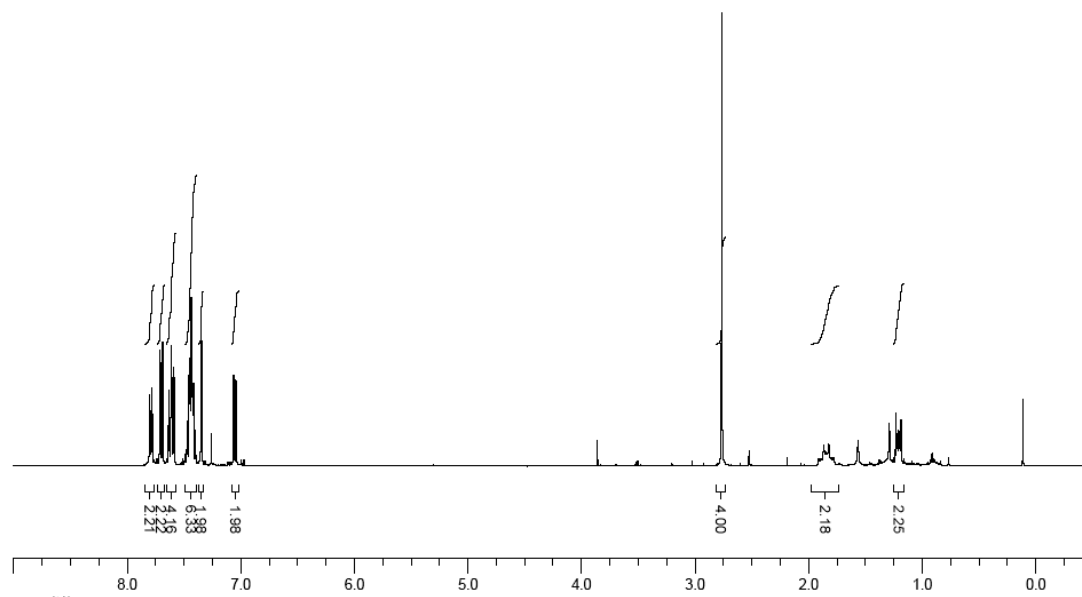

ppm (t1)  
 $^{13}\text{C}$  NMR, 100 MHz,  $\text{CDCl}_3$

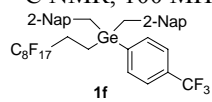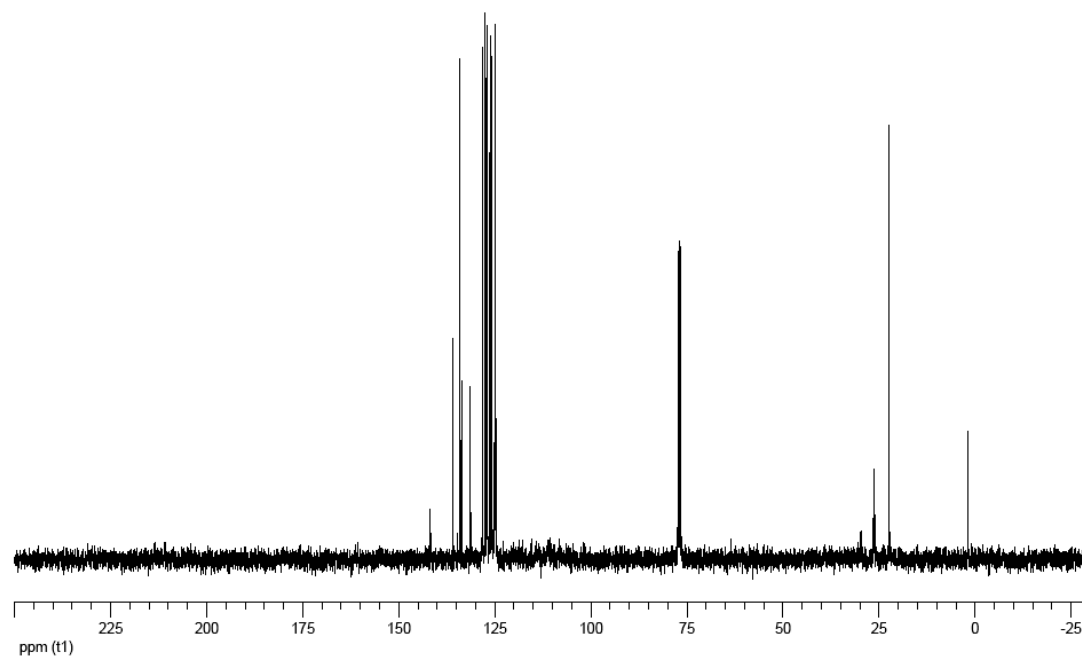

DEPT 135 100 MHz, CDCl<sub>3</sub>

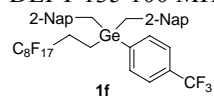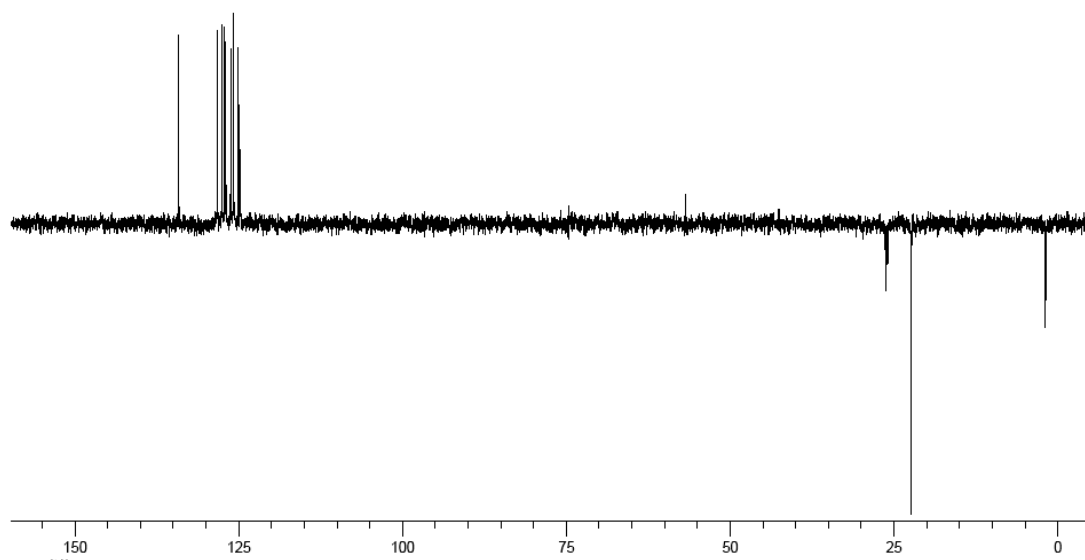

<sup>19</sup>F NMR 376 MHz, CDCl<sub>3</sub>

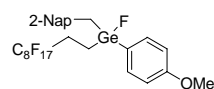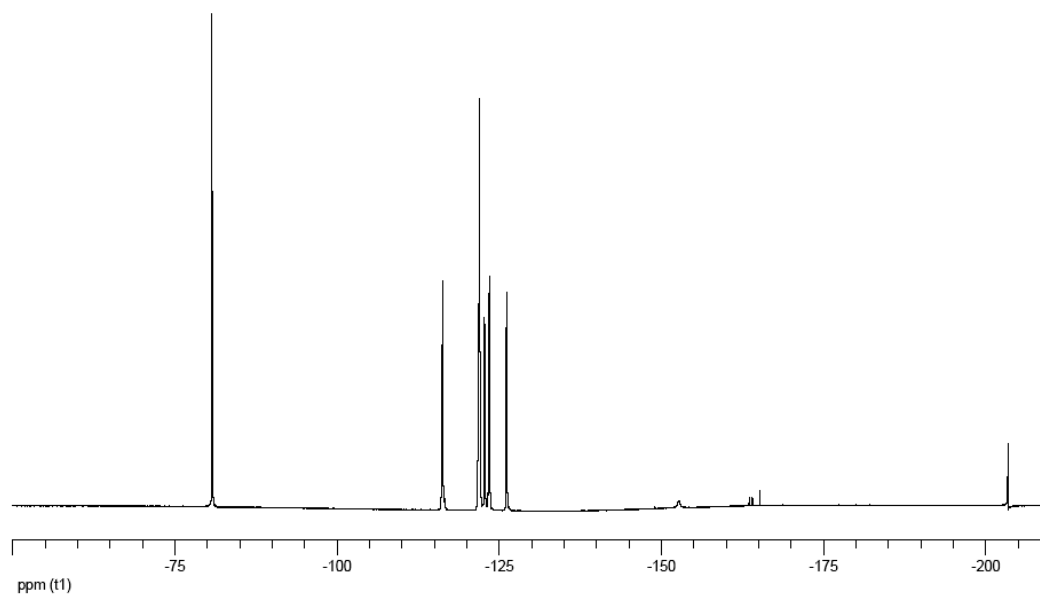



Supplementary Material (ESI) for Chemical Communications  
This journal is (c) The Royal Society of Chemistry 2007

$^{19}\text{F}$  NMR, 376 MHz,  $\text{CDCl}_3$ .

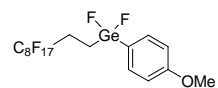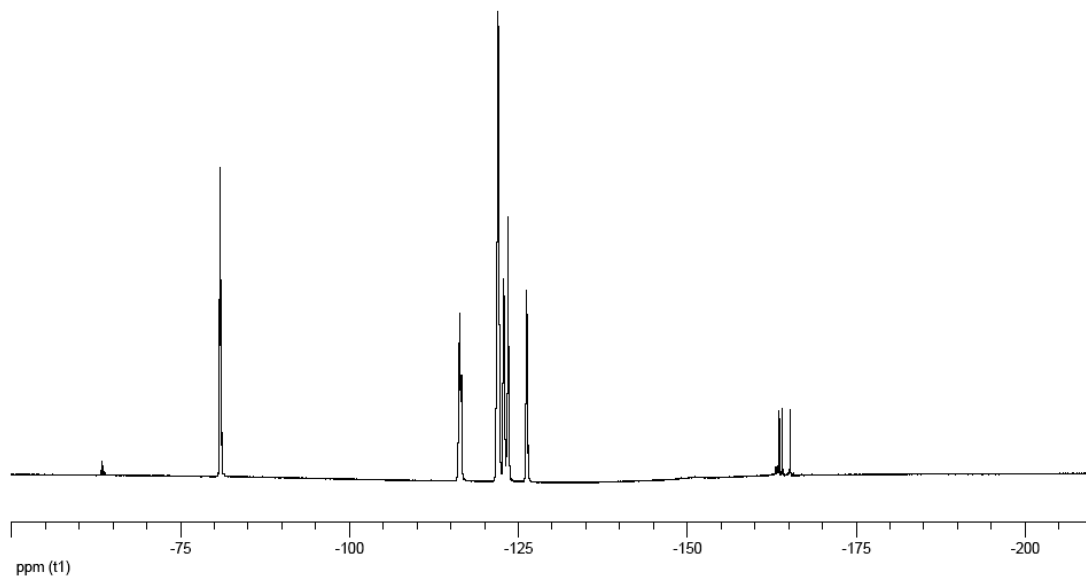

$^1\text{H}$  NMR, 400 MHz,  $\text{CDCl}_3$

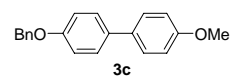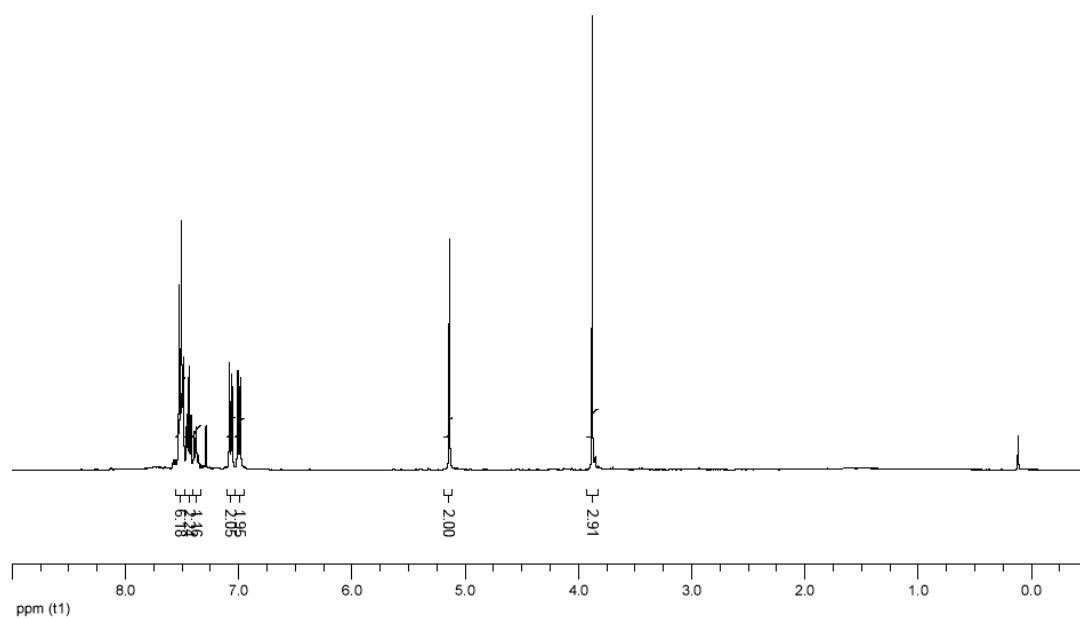

Supplementary Material (ESI) for Chemical Communications  
This journal is (c) The Royal Society of Chemistry 2007

$^{13}\text{C}$  NMR, 100 MHz,  $\text{CDCl}_3$

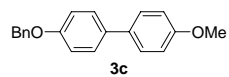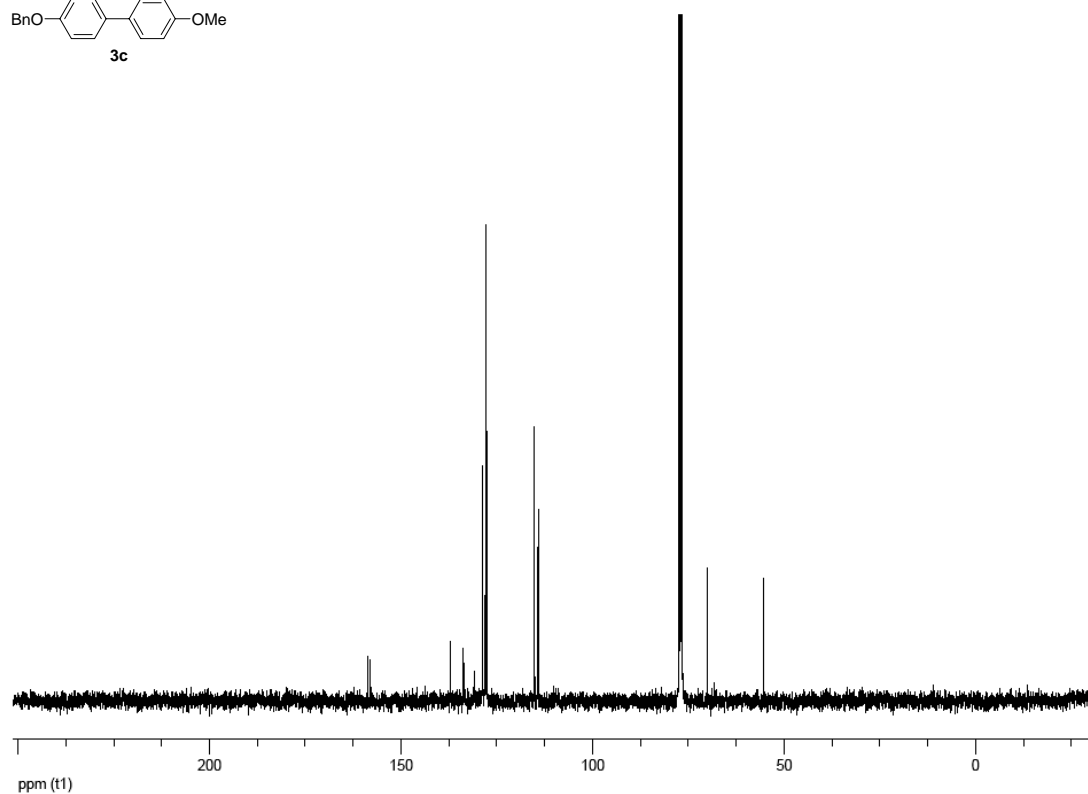

DEPT 135 100 MHz,  $\text{CDCl}_3$

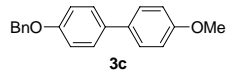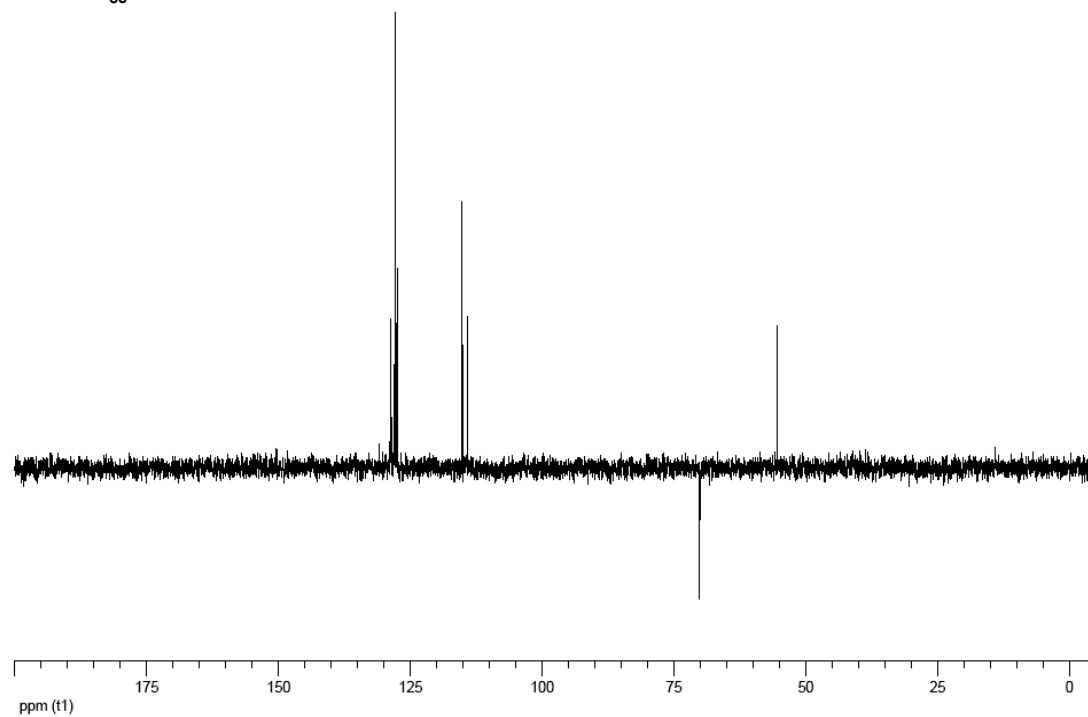

$^1\text{H}$  NMR, 400 MHz,  $\text{CDCl}_3$

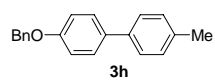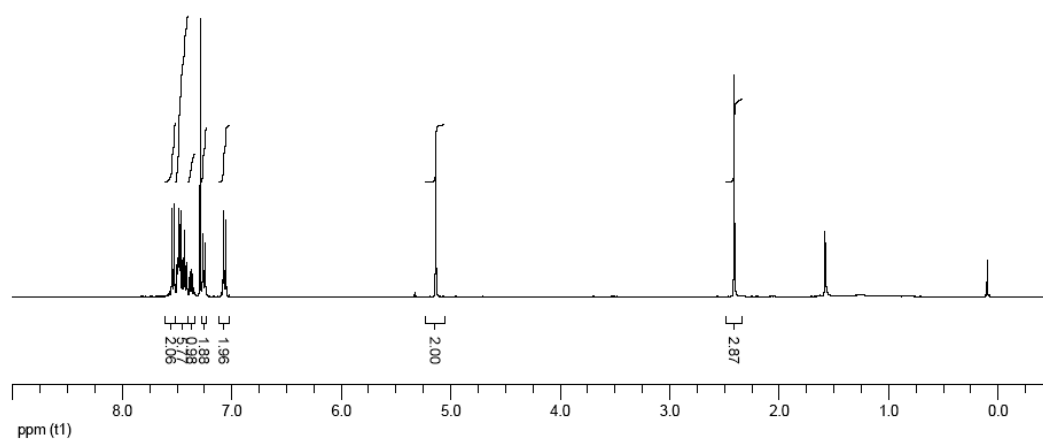

$^{13}\text{C}$  NMR, 100 MHz,  $\text{CDCl}_3$

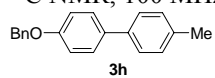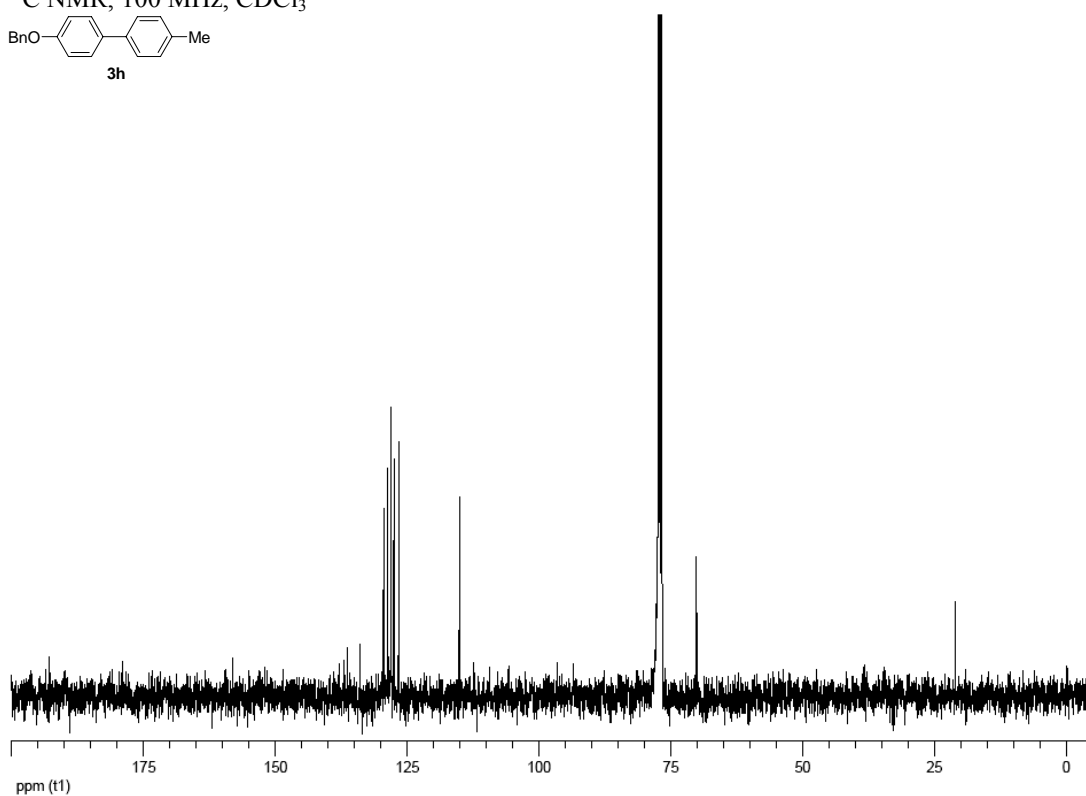

$^1\text{H}$  NMR, 400 MHz,  $\text{CDCl}_3$

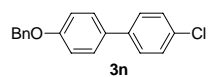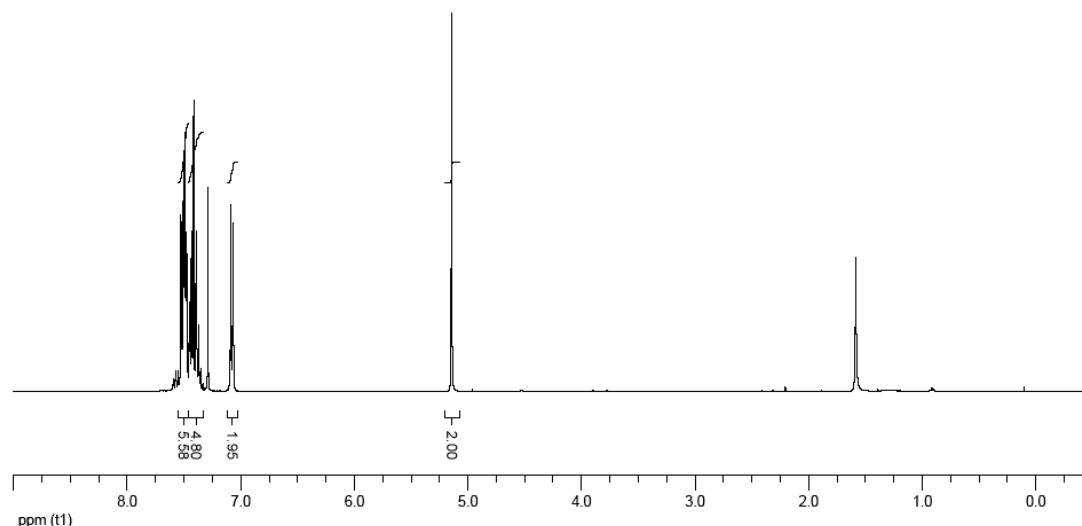

$^{13}\text{C}$  NMR, 100 MHz,  $\text{CDCl}_3$

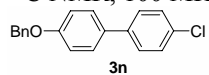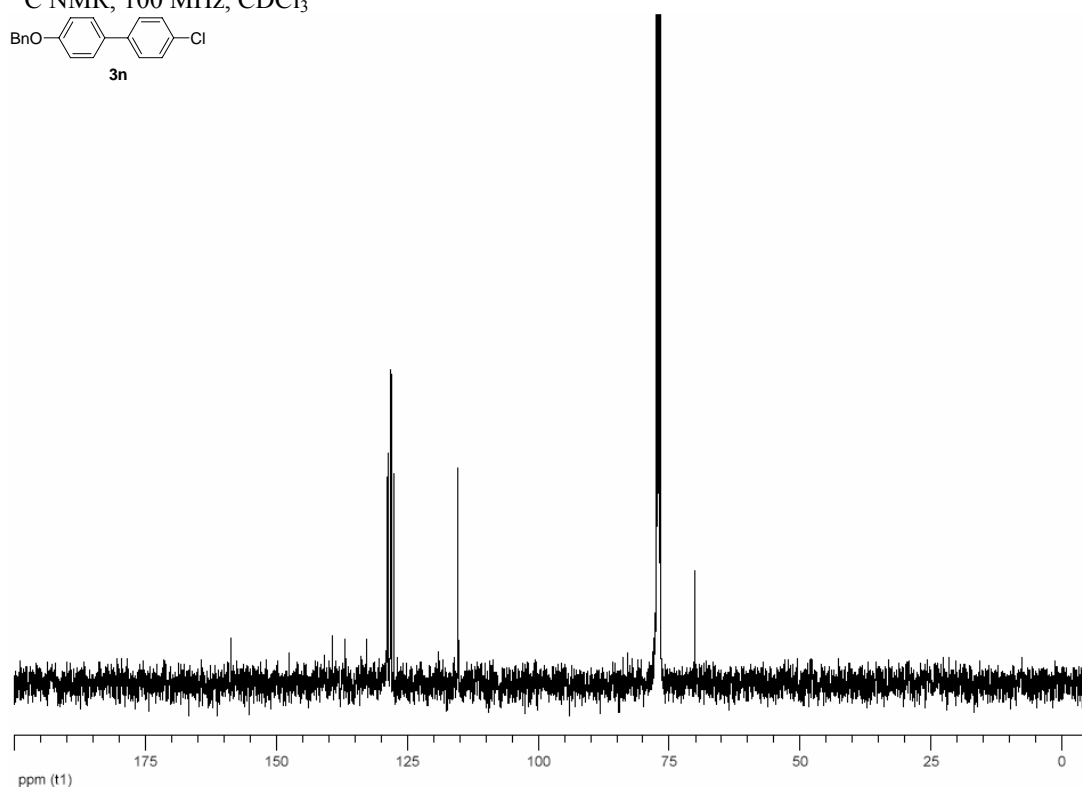

$^1\text{H}$  NMR, 400 MHz,  $\text{CDCl}_3$

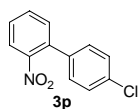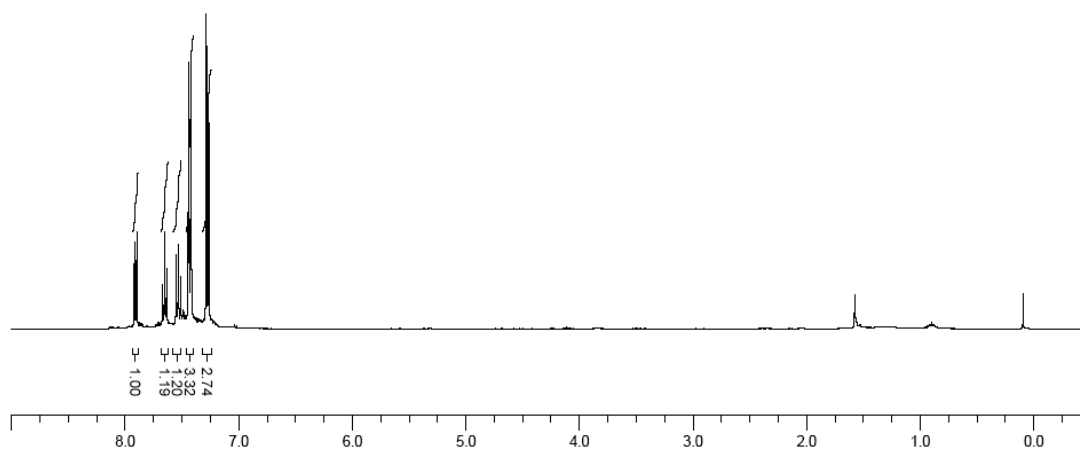

$^{13}\text{C}$  NMR, 100 MHz,  $\text{CDCl}_3$

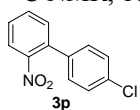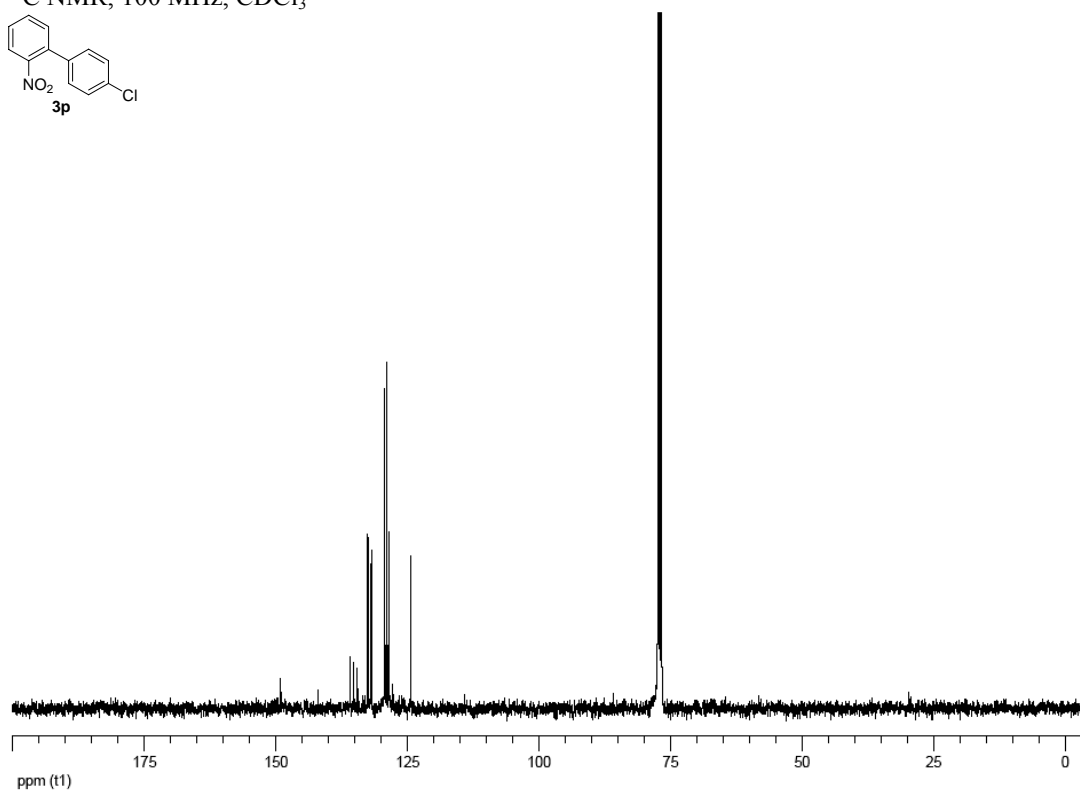

$^1\text{H}$  NMR, 400 MHz,  $\text{CDCl}_3$

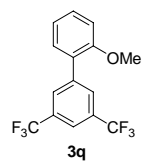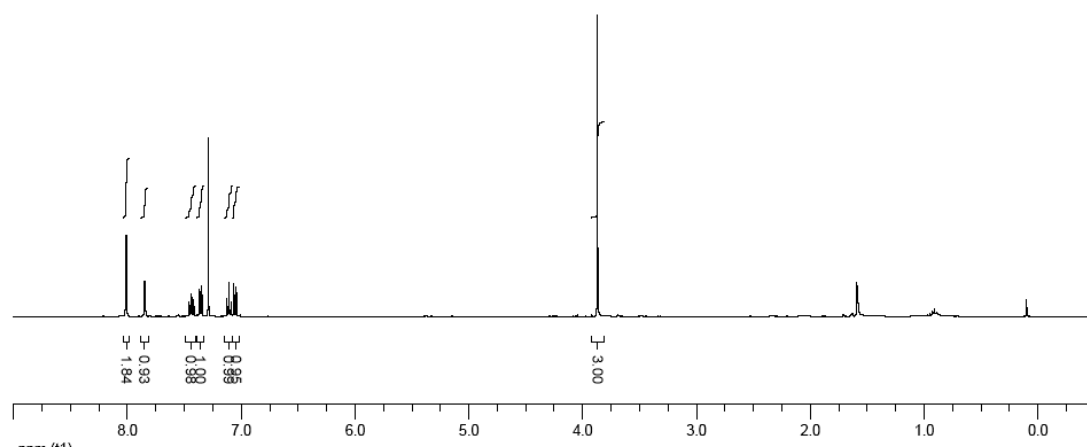

$^{13}\text{C}$  NMR, 100 MHz,  $\text{CDCl}_3$

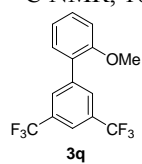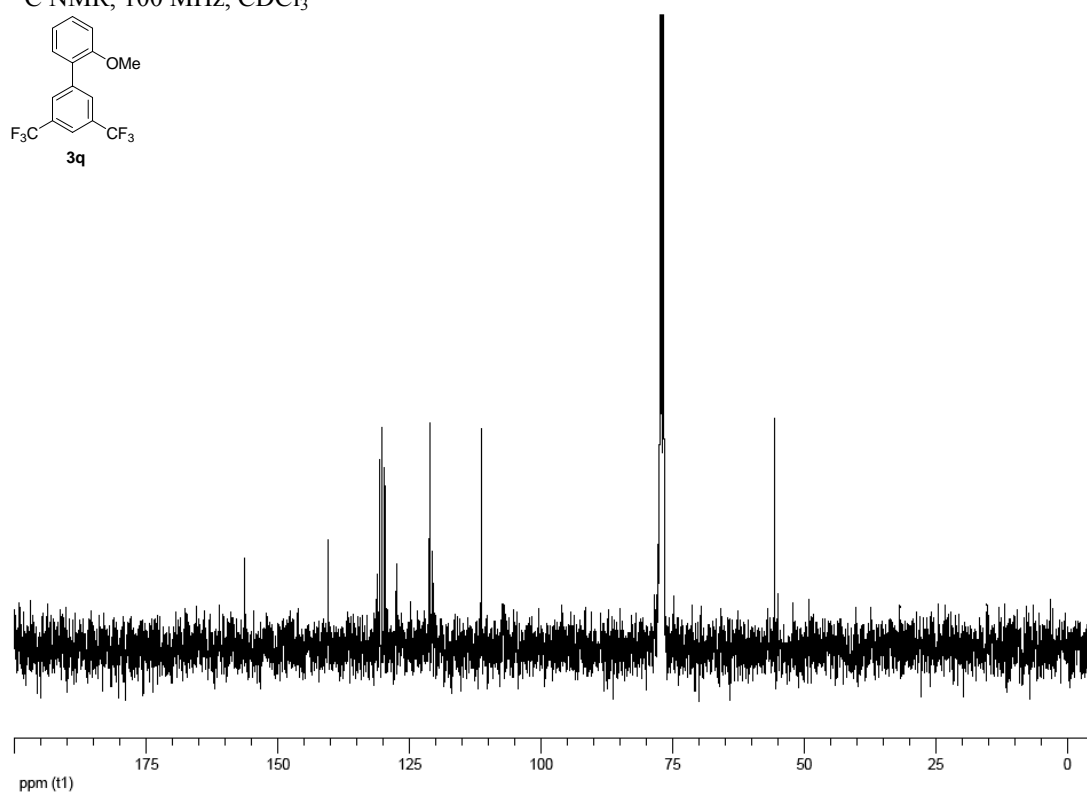

$^1\text{H}$  NMR, 400 MHz,  $\text{CDCl}_3$

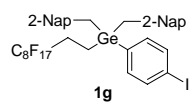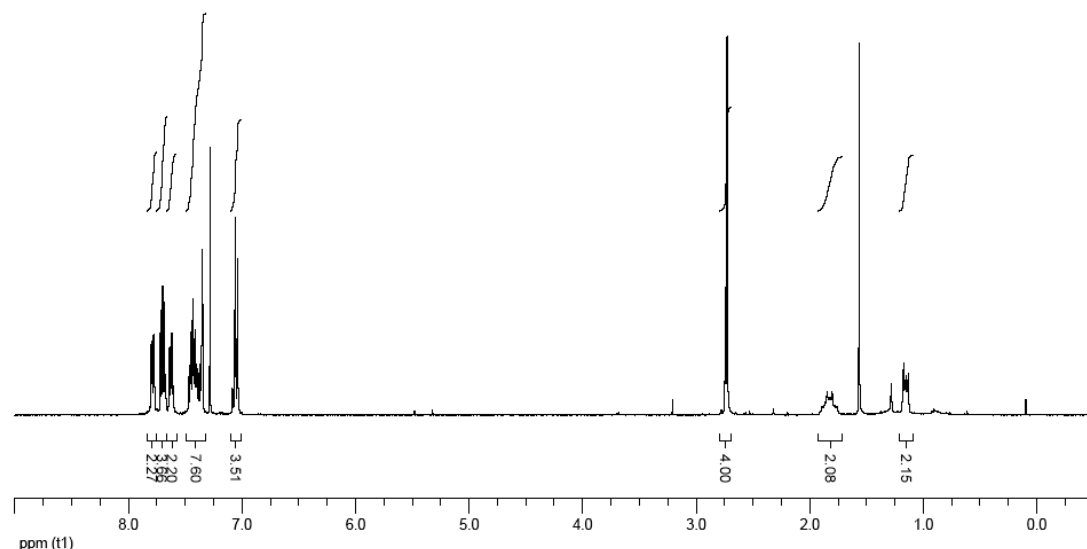

$^{13}\text{C}$  NMR, 100 MHz,  $\text{CDCl}_3$

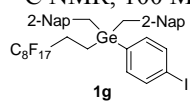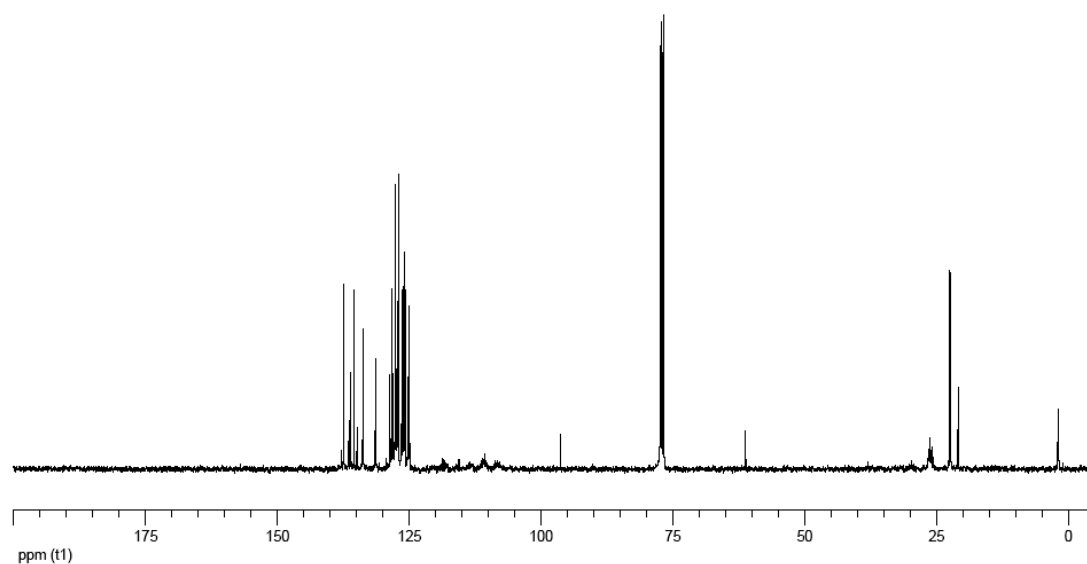

DEPT 135 100 MHz, CDCl<sub>3</sub>

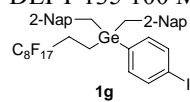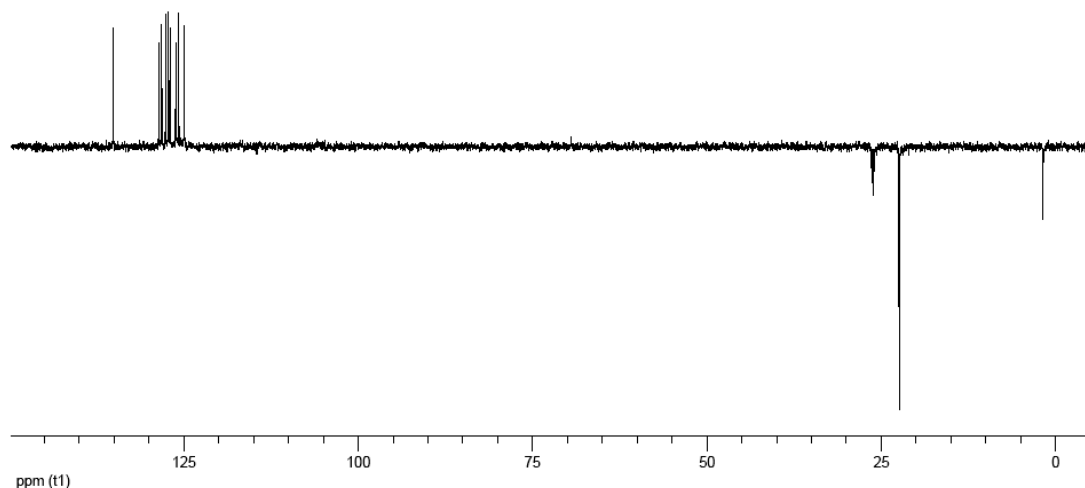

<sup>1</sup>H NMR, 400 MHz, CDCl<sub>3</sub>

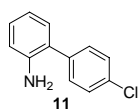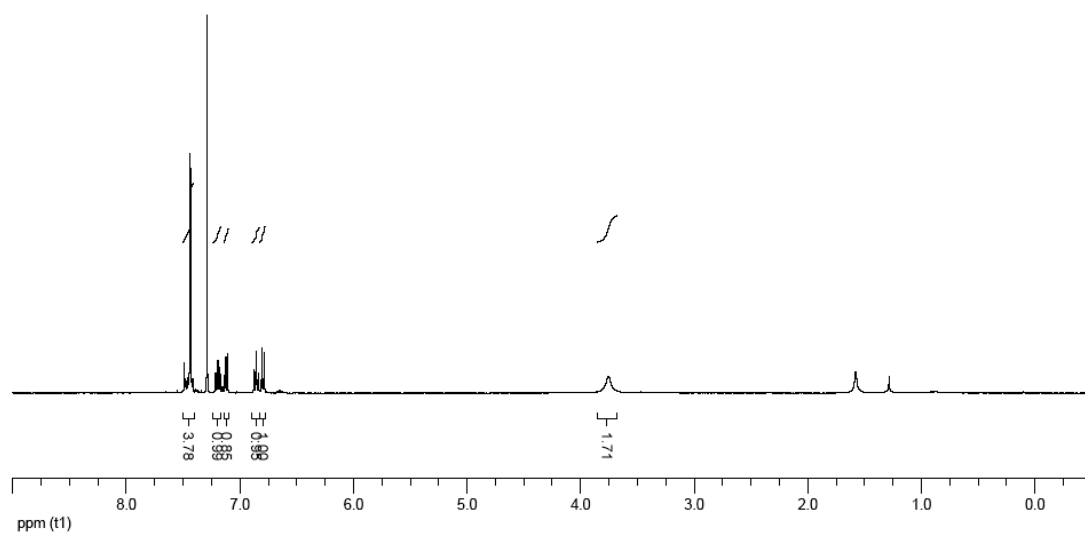



$^{13}\text{C}$  NMR, 100 MHz,  $\text{CDCl}_3$

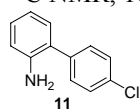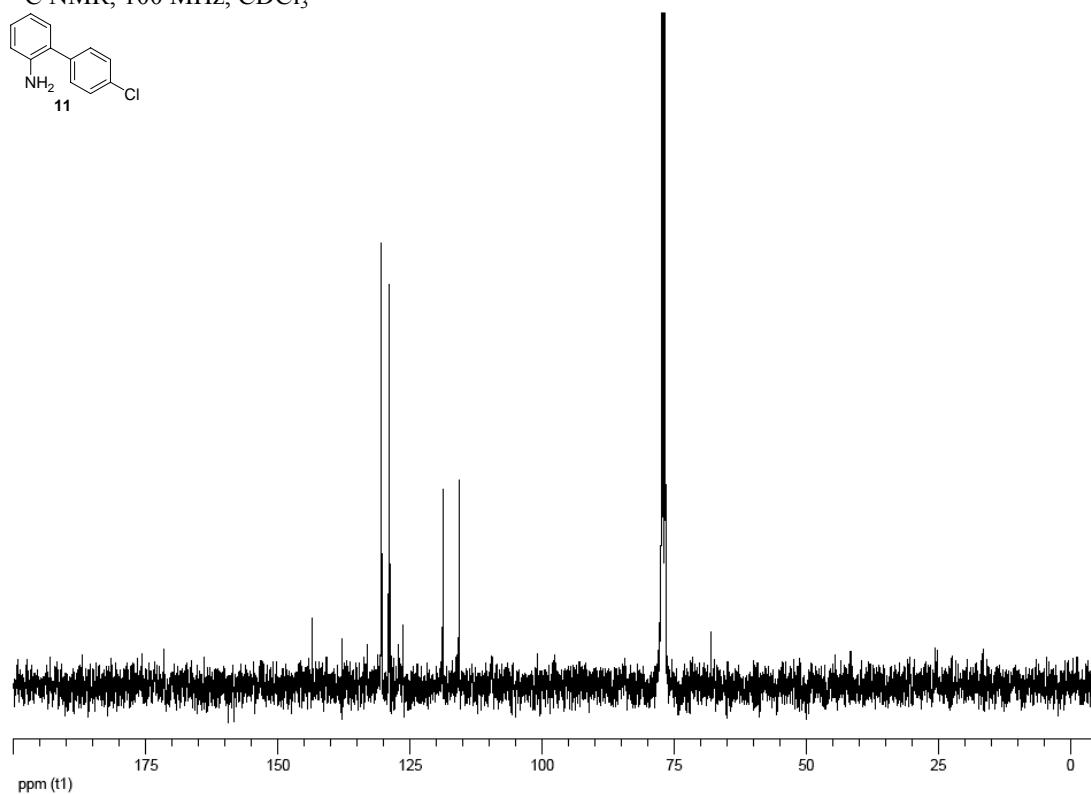

$^1\text{H}$  NMR, 400 MHz,  $\text{CDCl}_3$

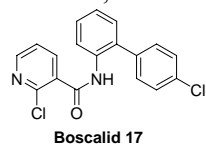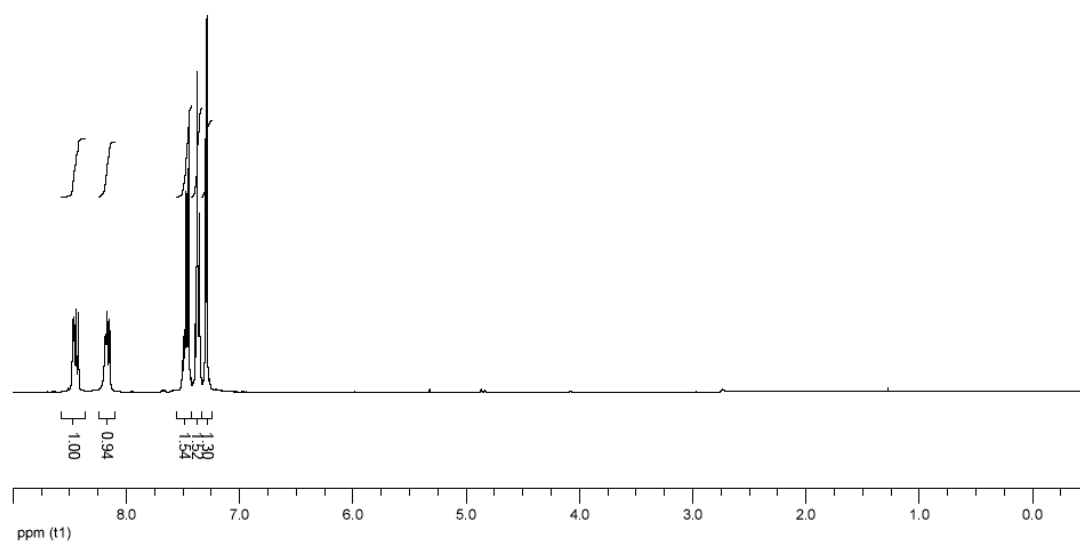

$^{13}\text{C}$  NMR, 100 MHz,  $\text{CDCl}_3$

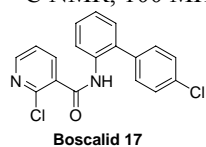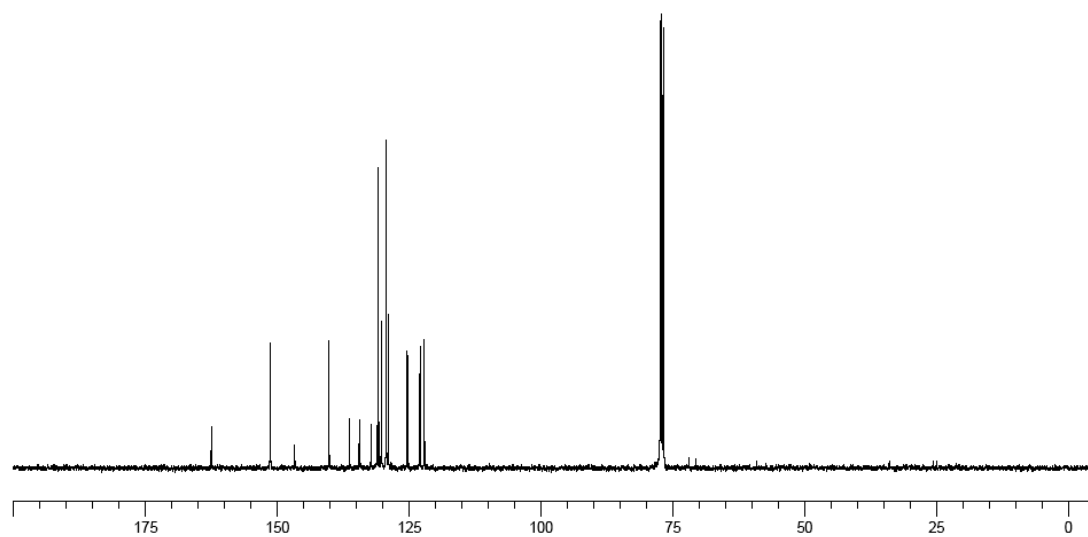

$^1\text{H}$  NMR, 500 MHz,  $\text{C}_6\text{D}_6$

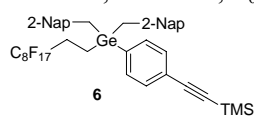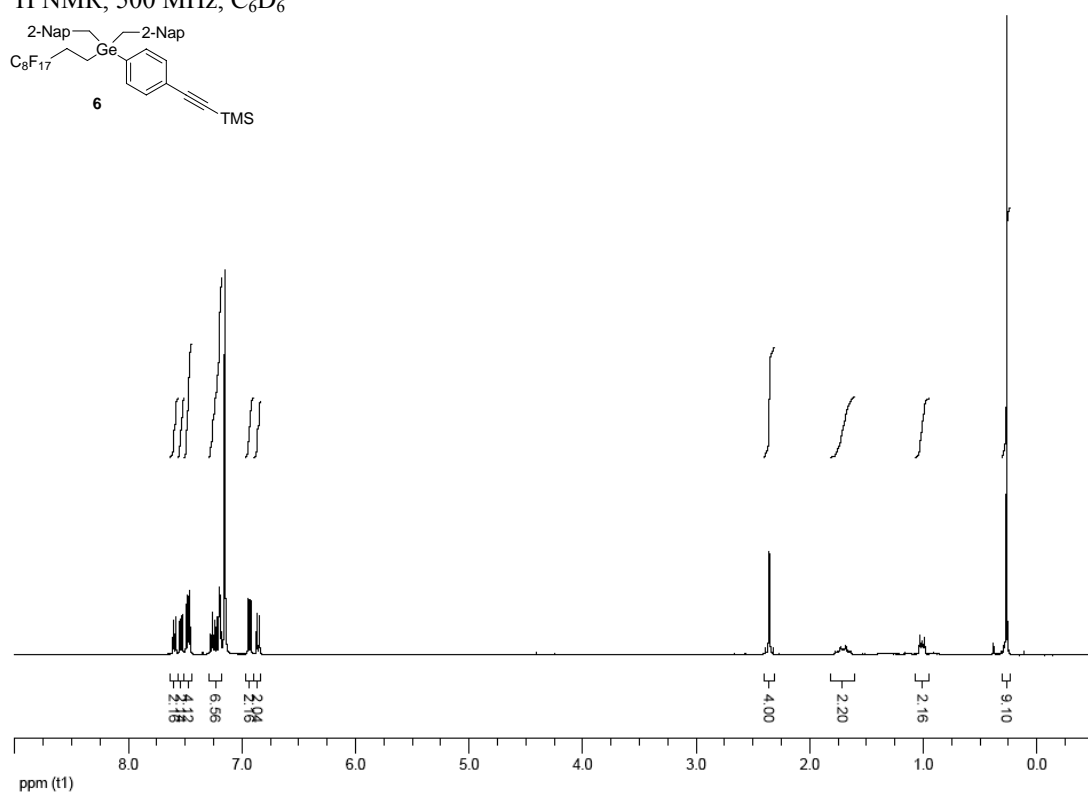

$^{13}\text{C}$  NMR, 100 MHz,  $\text{C}_6\text{D}_6$

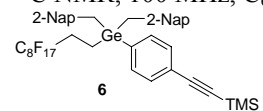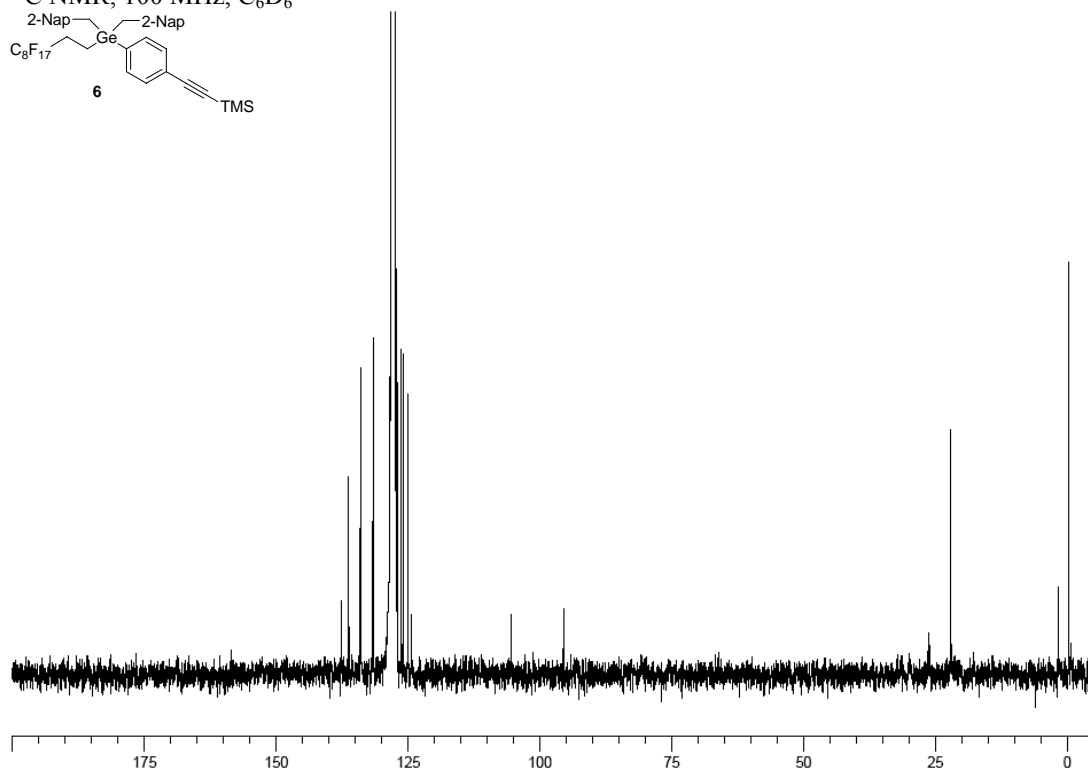

DEPT 135 100 MHz,  $\text{C}_6\text{D}_6$

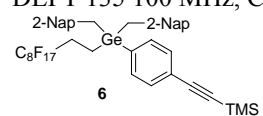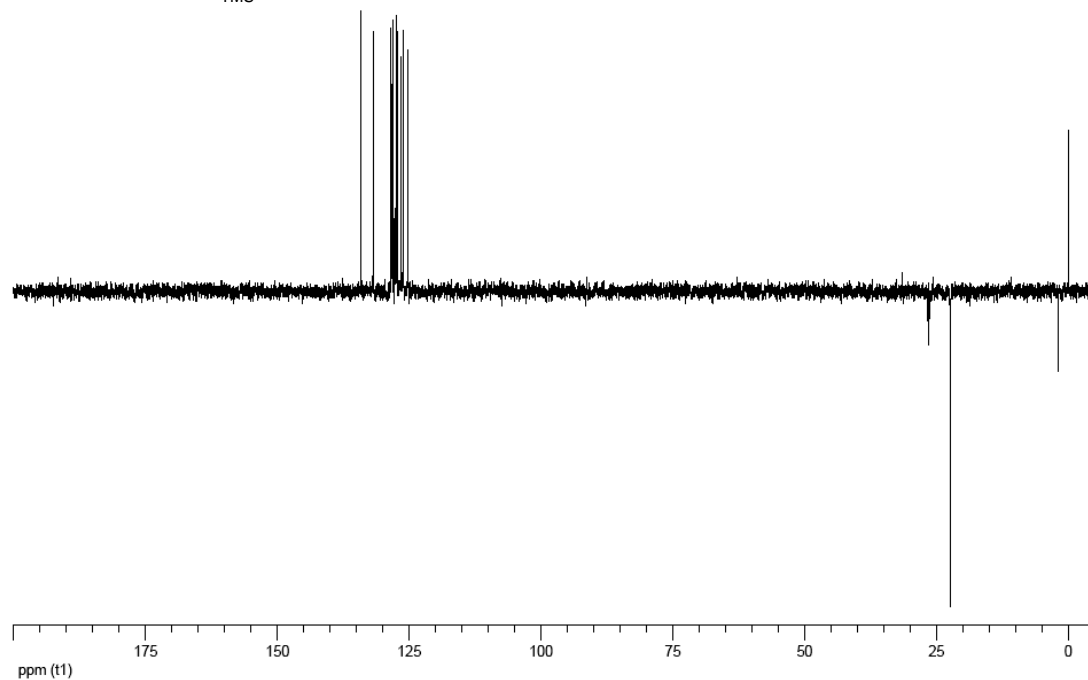

$^1\text{H}$  NMR, 400 MHz,  $\text{CDCl}_3$

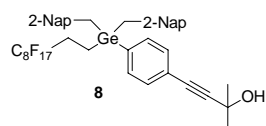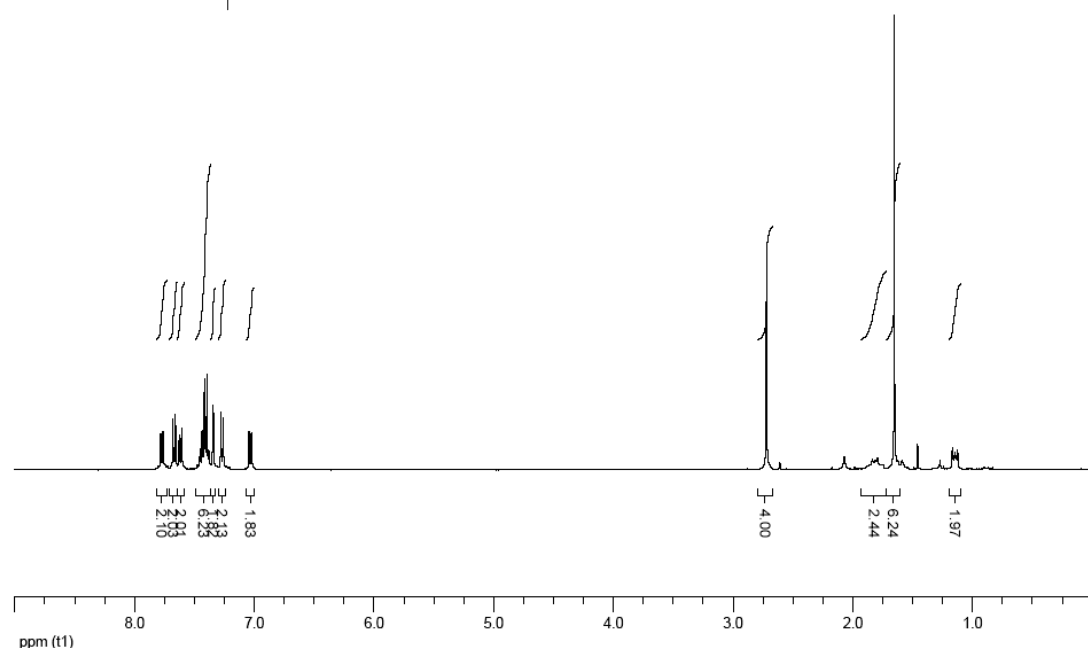

$^{13}\text{C}$  NMR, 100 MHz,  $\text{CDCl}_3$

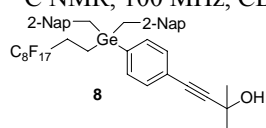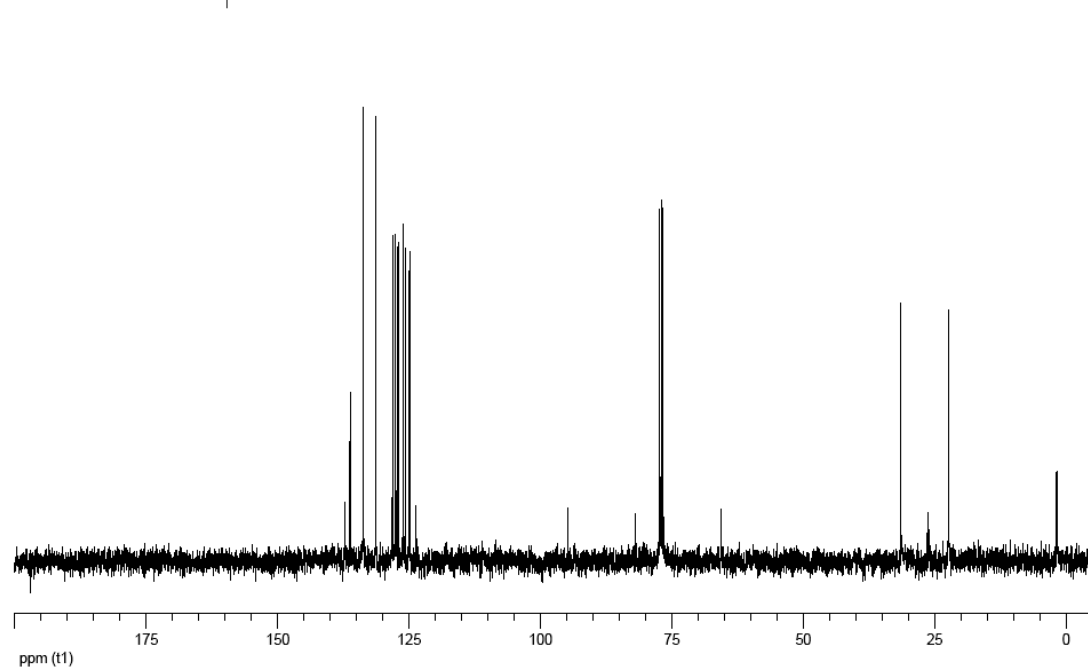

DEPT 135 100 MHz, CDCl<sub>3</sub>

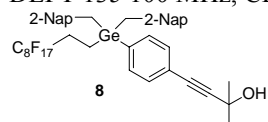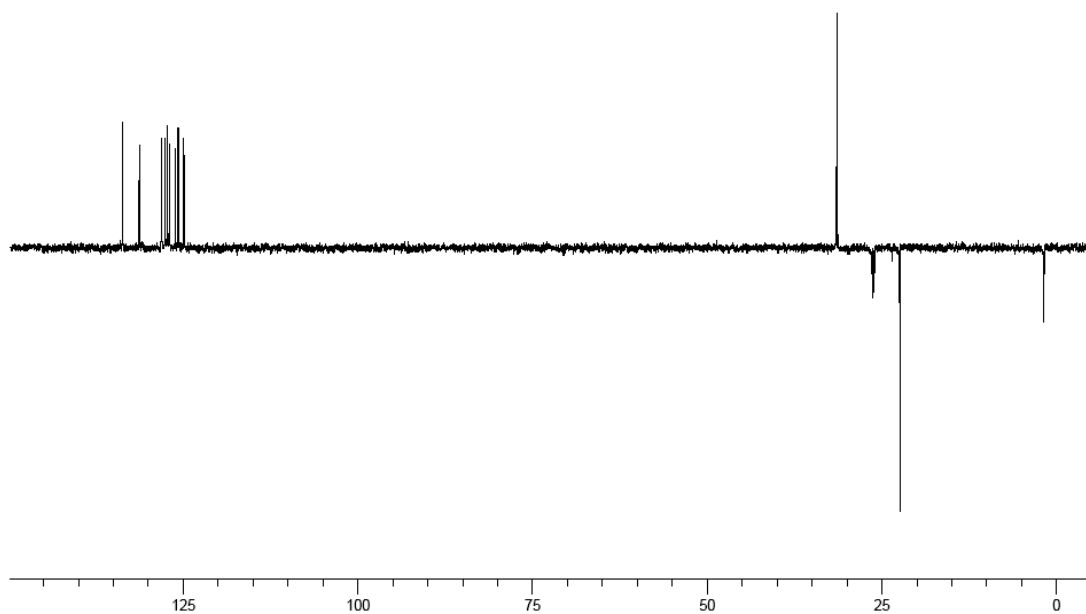

ppm (t1)  
<sup>1</sup>H NMR, 400 MHz, CDCl<sub>3</sub>

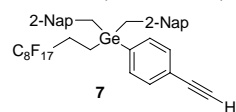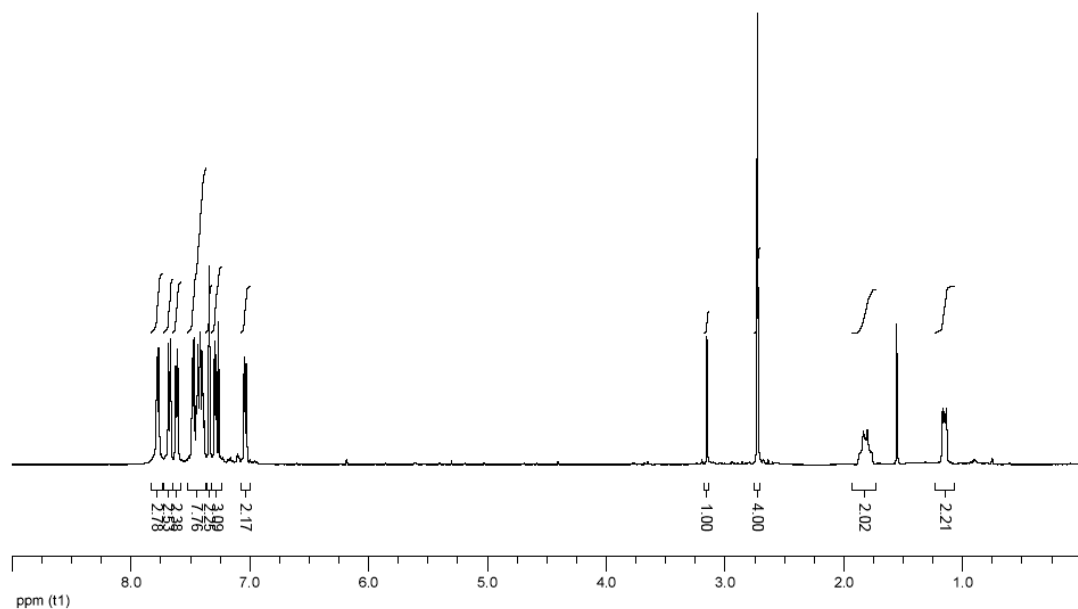

$^{13}\text{C}$  NMR, 100 MHz,  $\text{CDCl}_3$

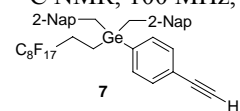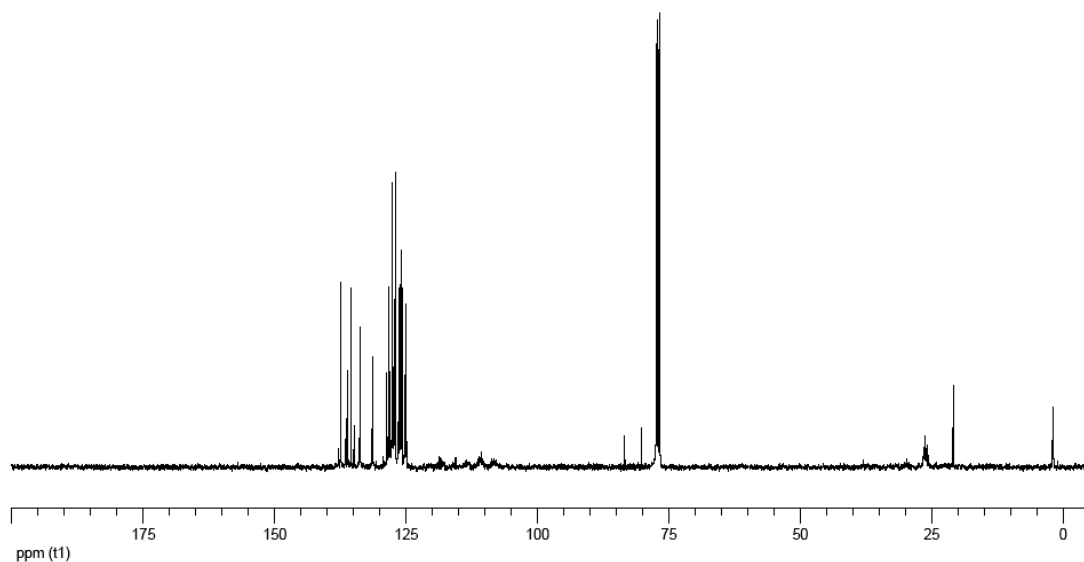

DEPT 135 100 MHz,  $\text{CDCl}_3$

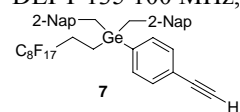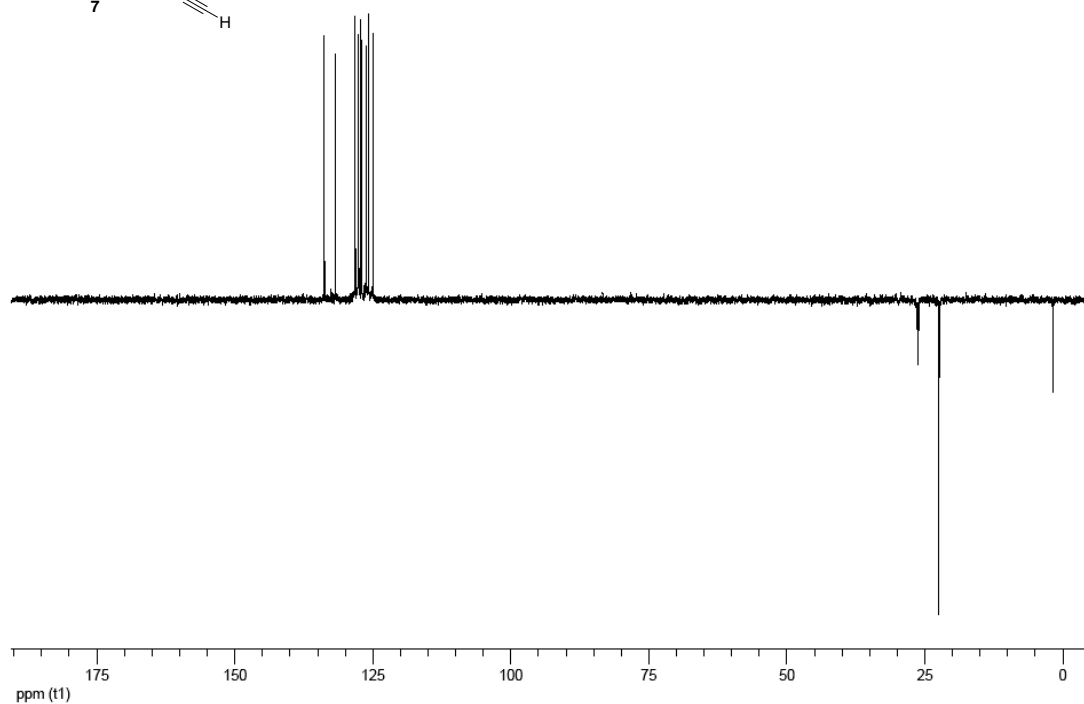

$^1\text{H}$  NMR, 400 MHz,  $\text{CDCl}_3$

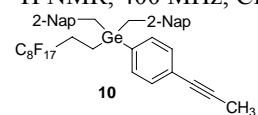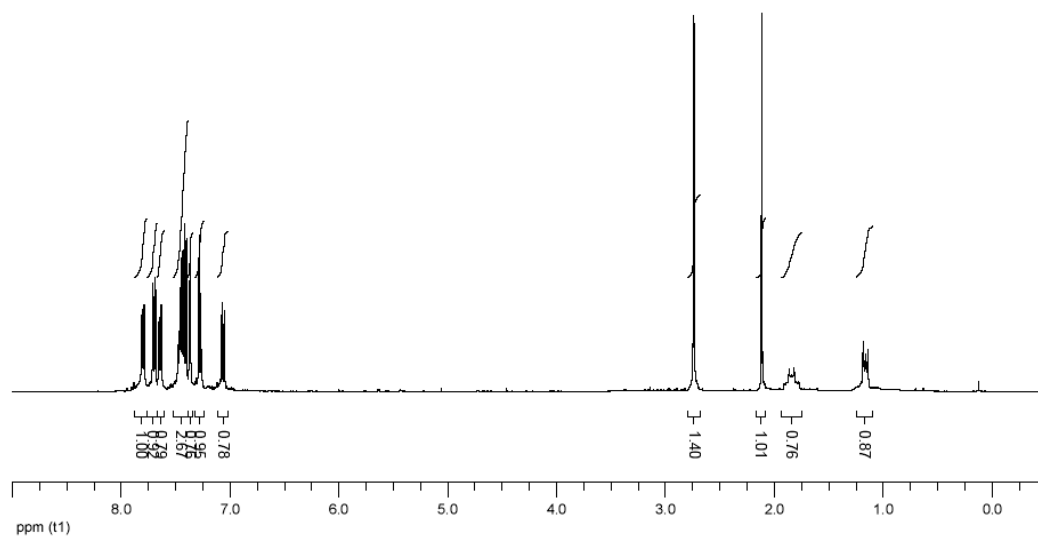

$^{13}\text{C}$  NMR, 100 MHz,  $\text{CDCl}_3$

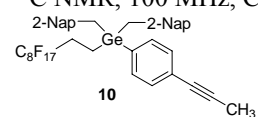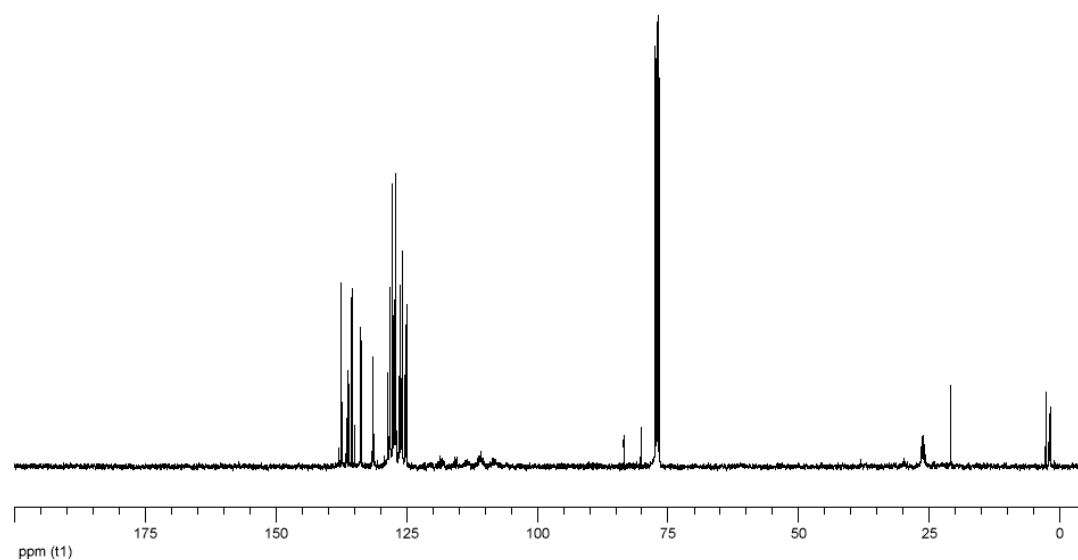

DEPT 135 100 MHz, CDCl<sub>3</sub>

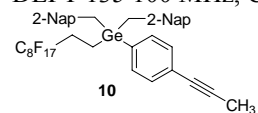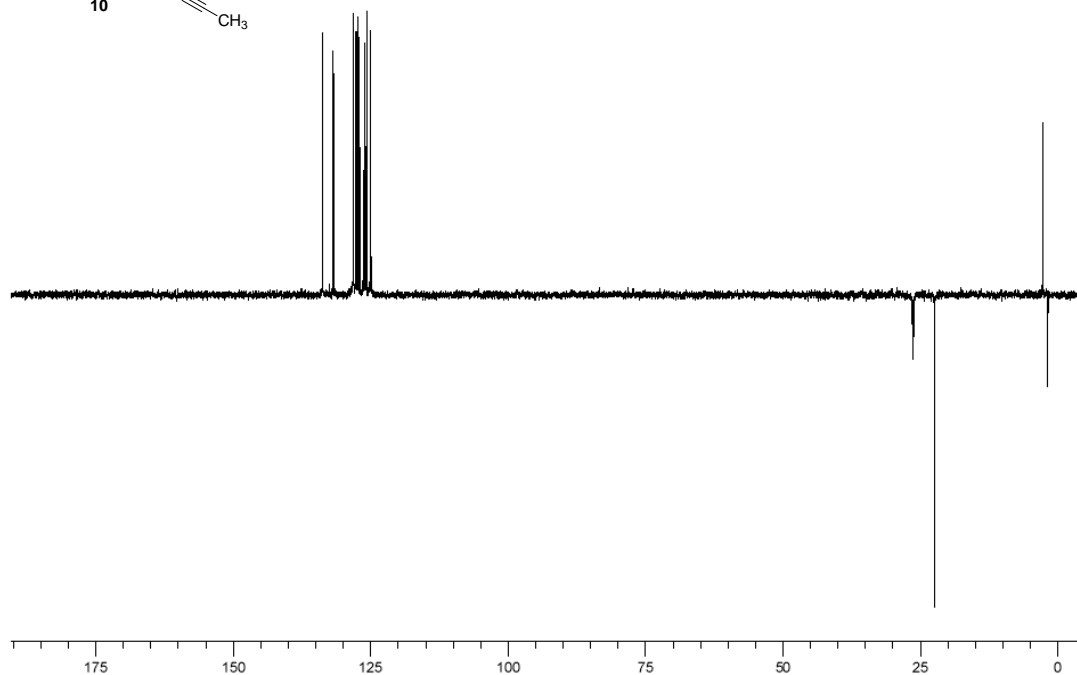

<sup>1</sup>H NMR, 400 MHz, CDCl<sub>3</sub>

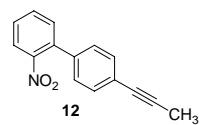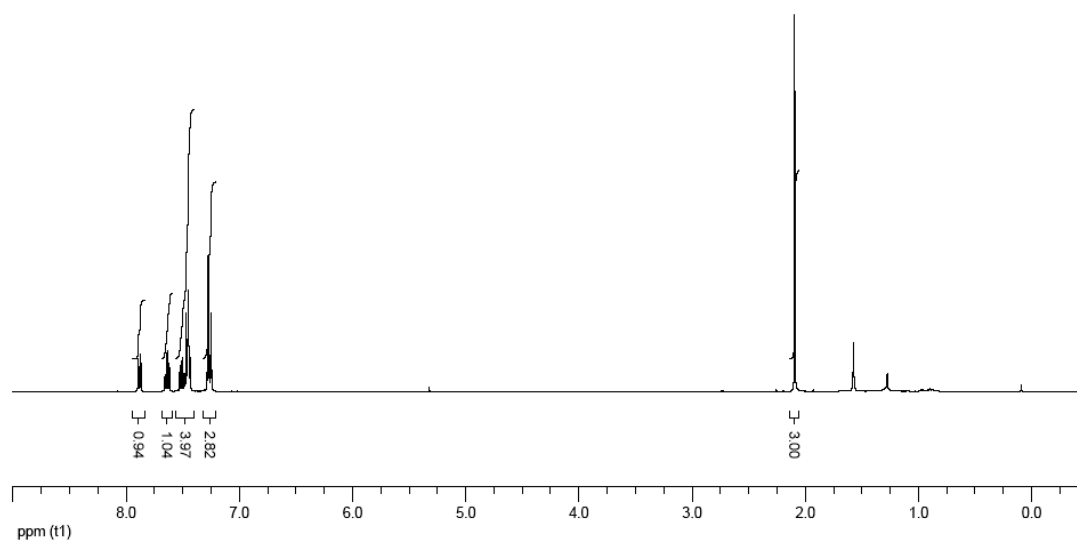



$^{13}\text{C}$  NMR, 100 MHz,  $\text{CDCl}_3$

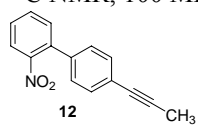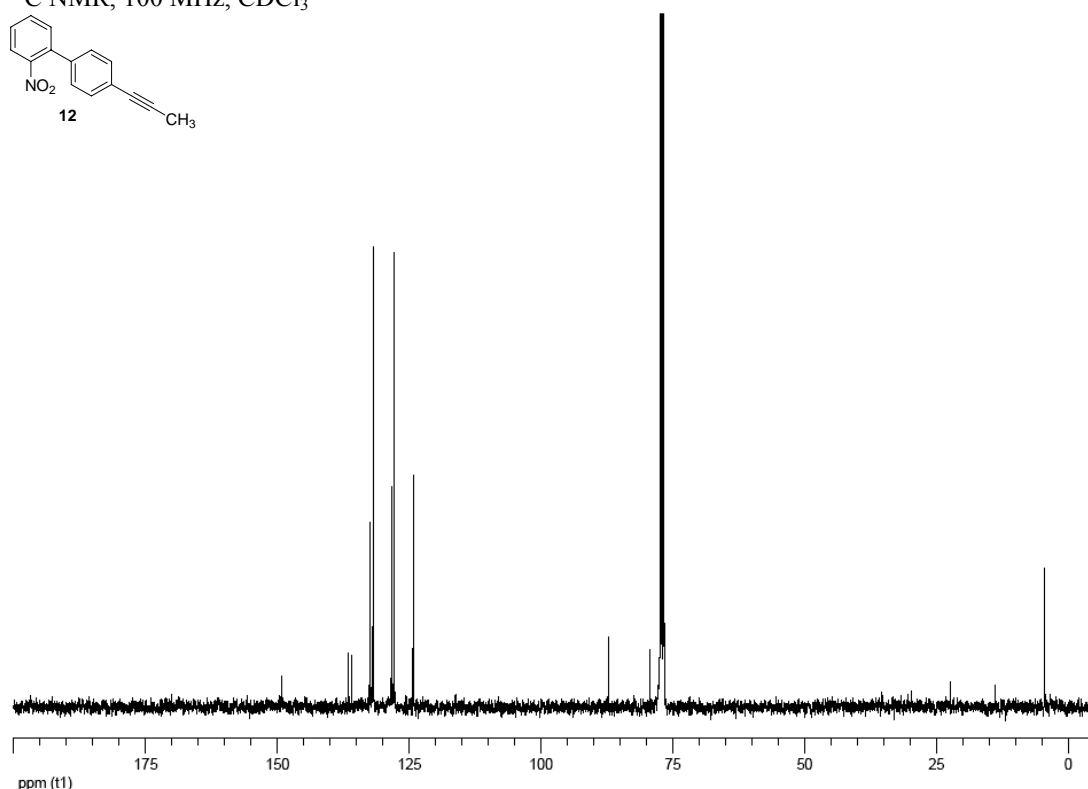

$^1\text{H}$  NMR, 400 MHz,  $\text{CDCl}_3$

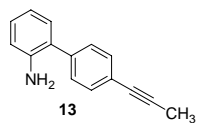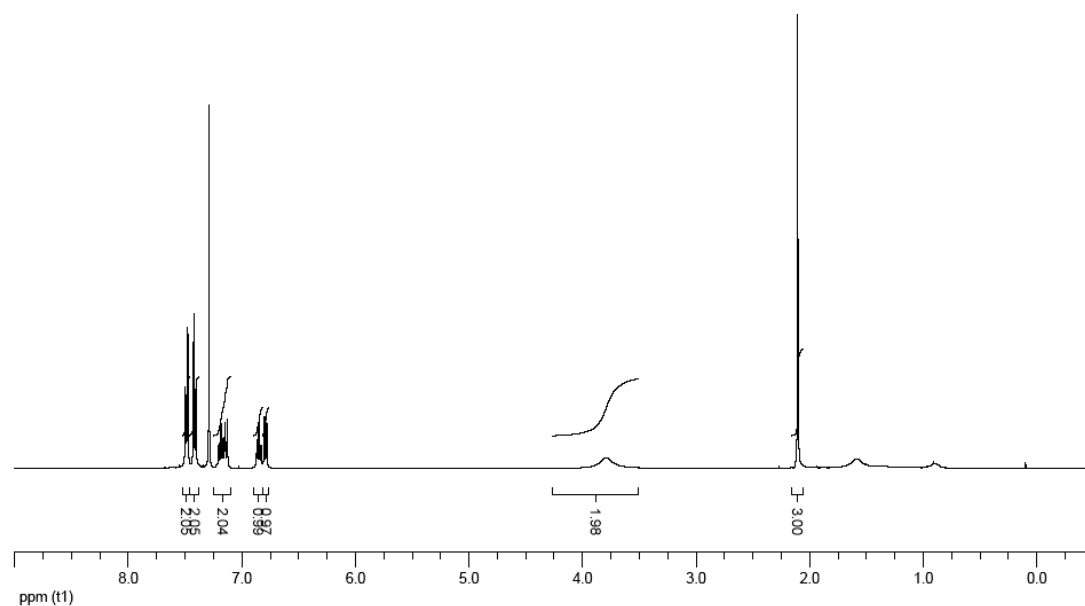

$^{13}\text{C}$  NMR, 100 MHz,  $\text{CDCl}_3$

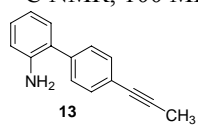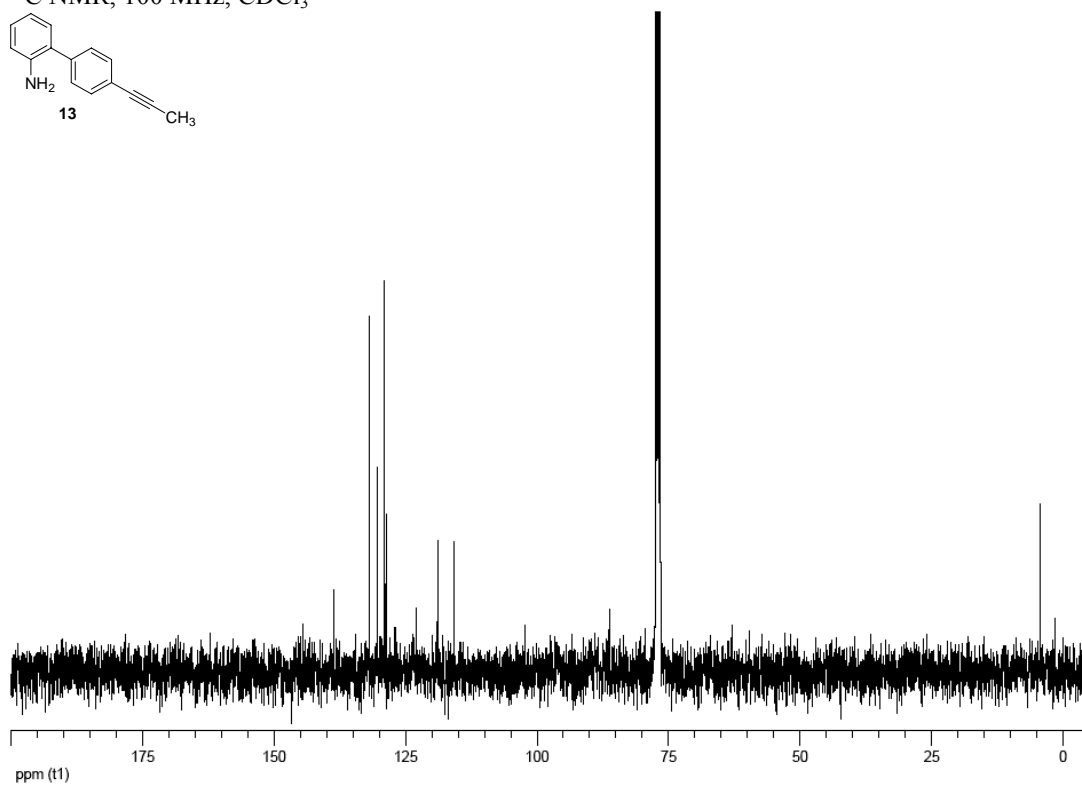

$^1\text{H}$  NMR, 400 MHz,  $\text{CDCl}_3$

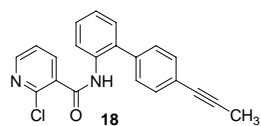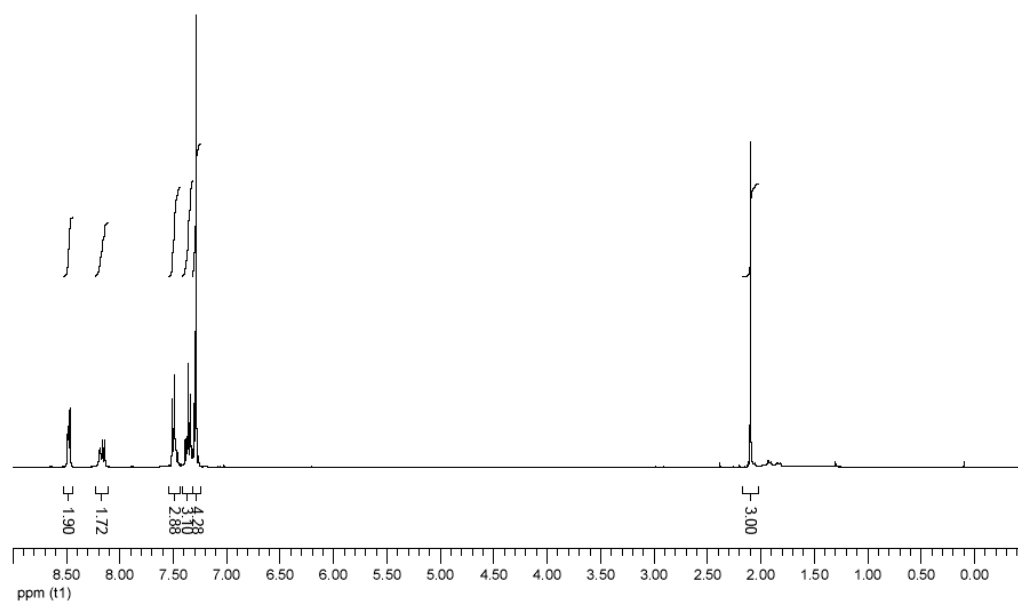

$^{13}\text{C}$  NMR, 100 MHz,  $\text{CDCl}_3$

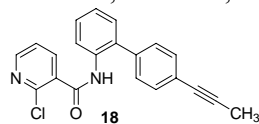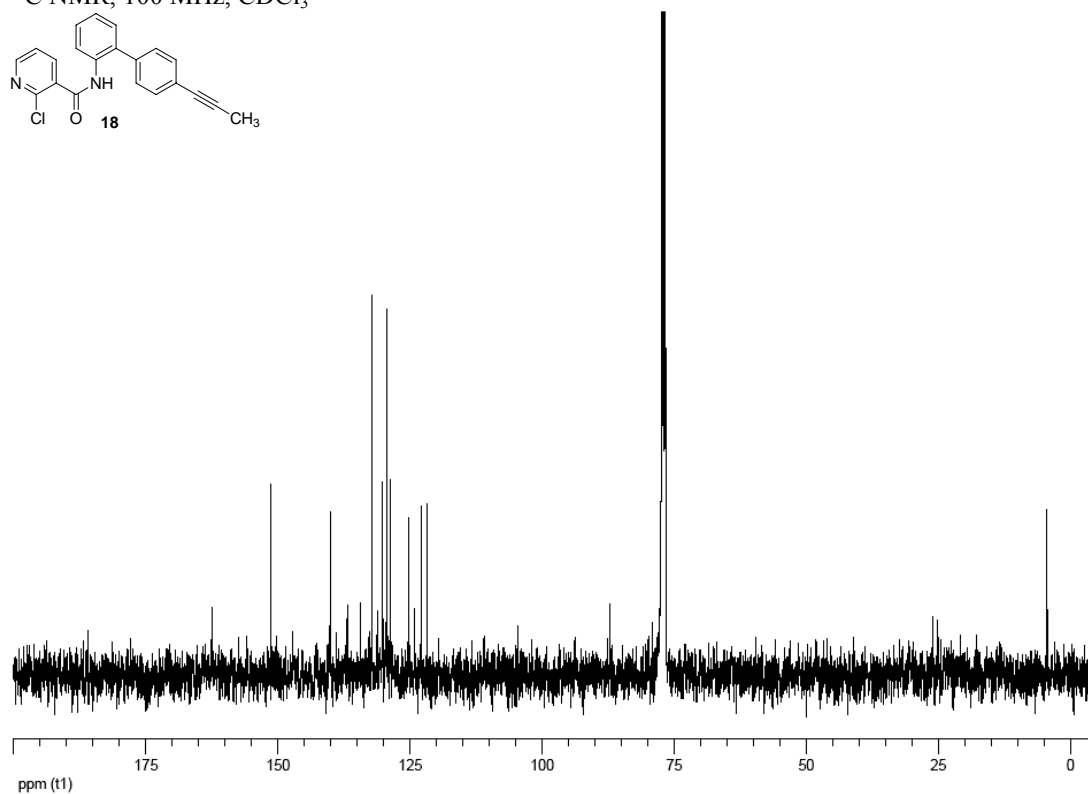

$^1\text{H}$  NMR, 400 MHz,  $\text{CDCl}_3$

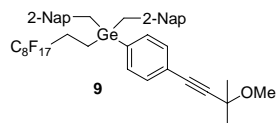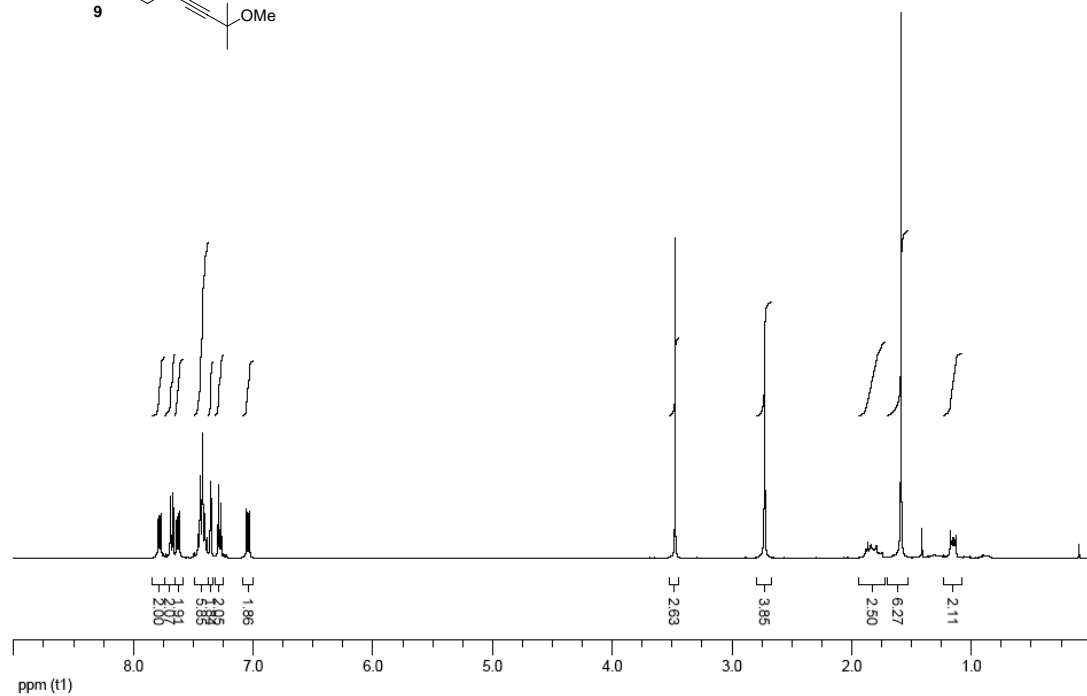

$^{13}\text{C}$  NMR, 100 MHz,  $\text{CDCl}_3$

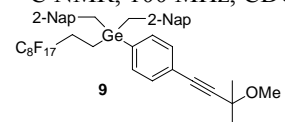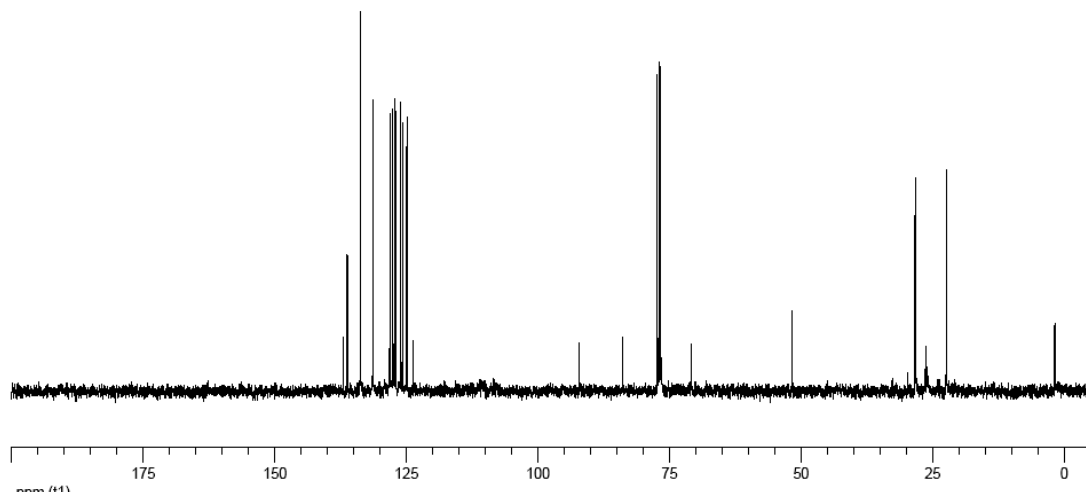

DEPT 135 100 MHz,  $\text{CDCl}_3$

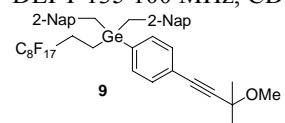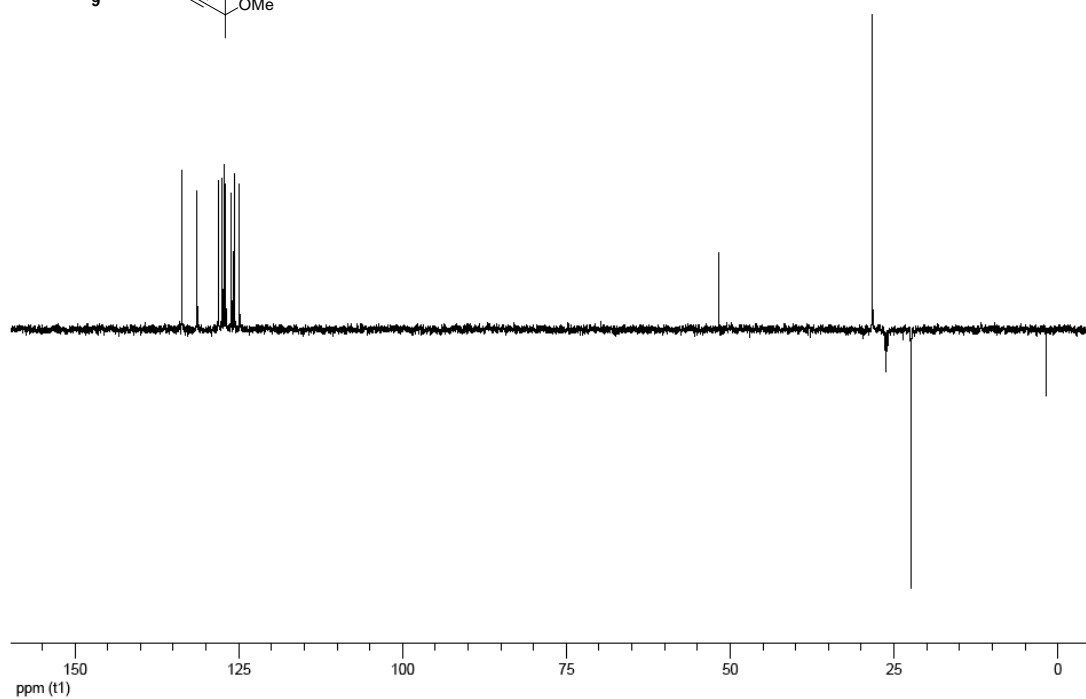

$^1\text{H}$  NMR, 400 MHz,  $\text{CDCl}_3$

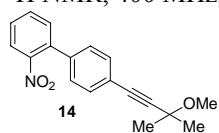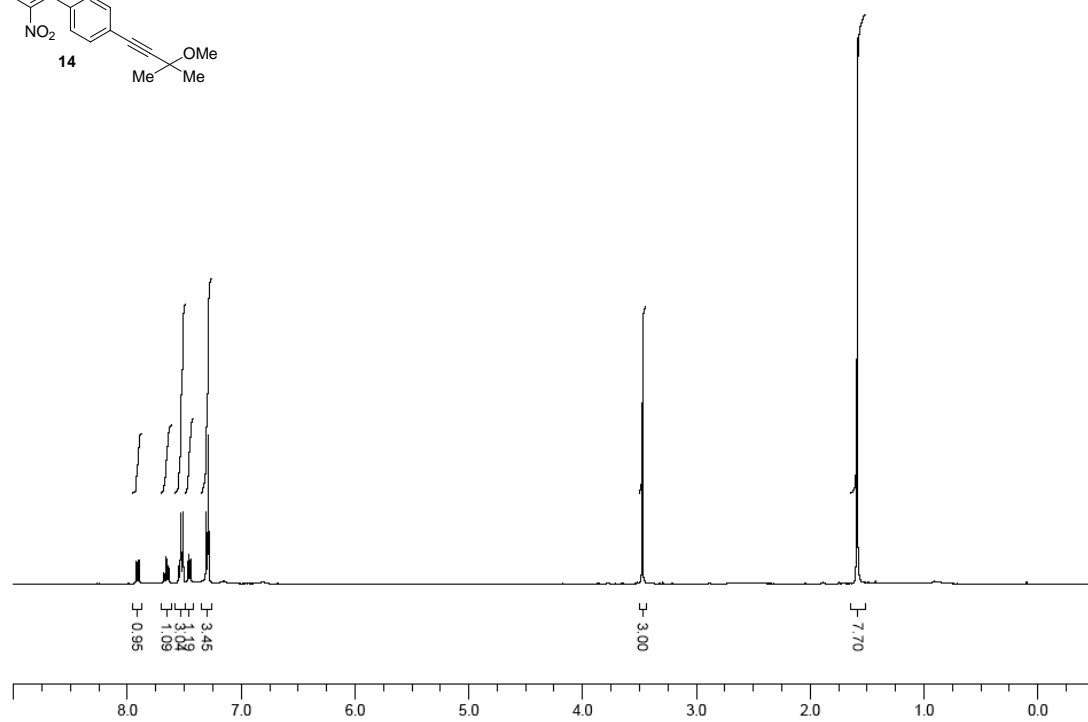

$^{13}\text{C}$  NMR, 100 MHz,  $\text{CDCl}_3$

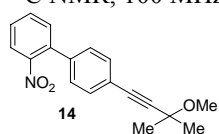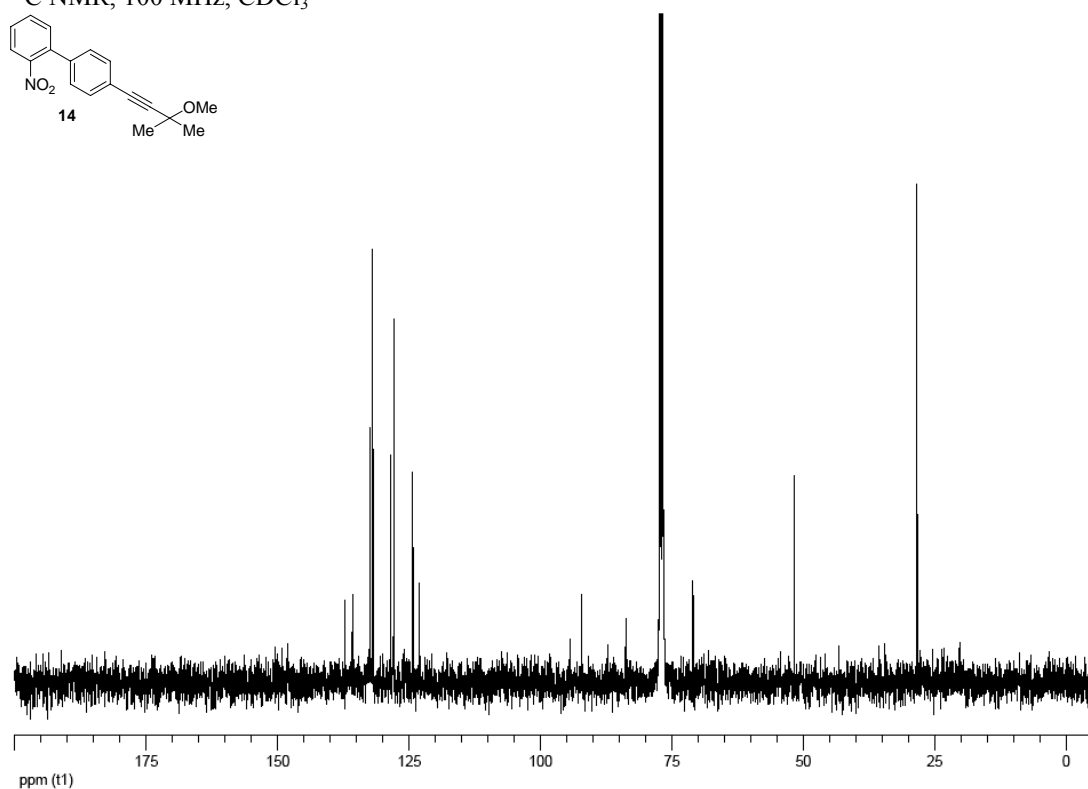

$^1\text{H}$  NMR, 400 MHz,  $\text{CDCl}_3$

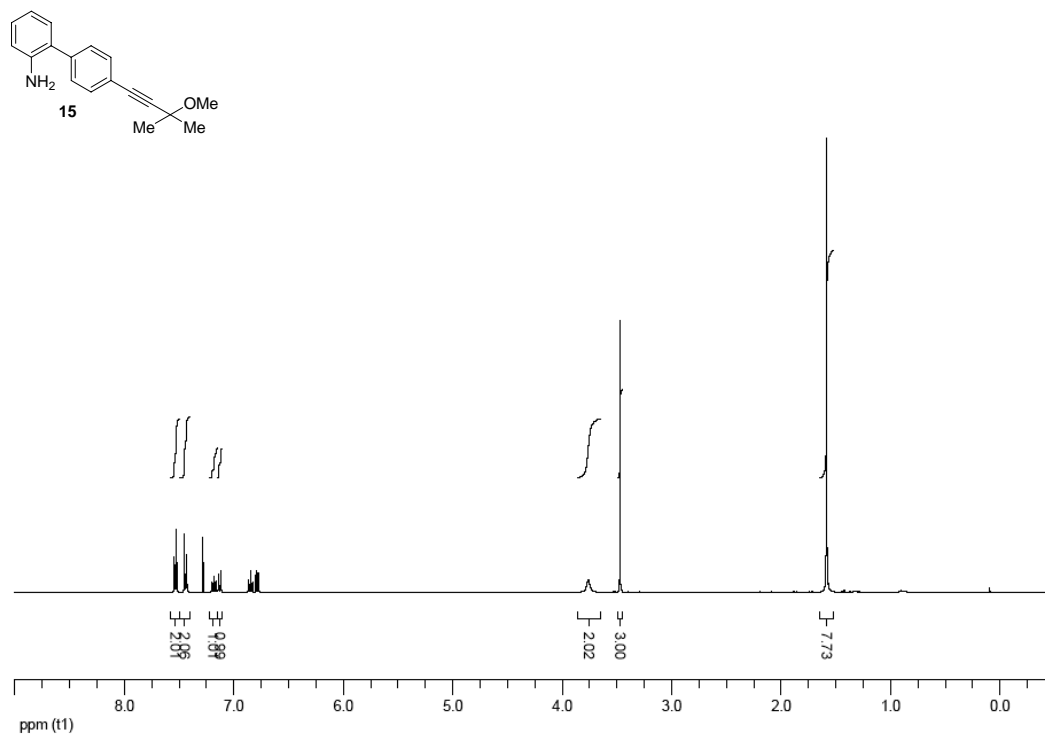

$^{13}\text{C}$  NMR, 100 MHz,  $\text{CDCl}_3$

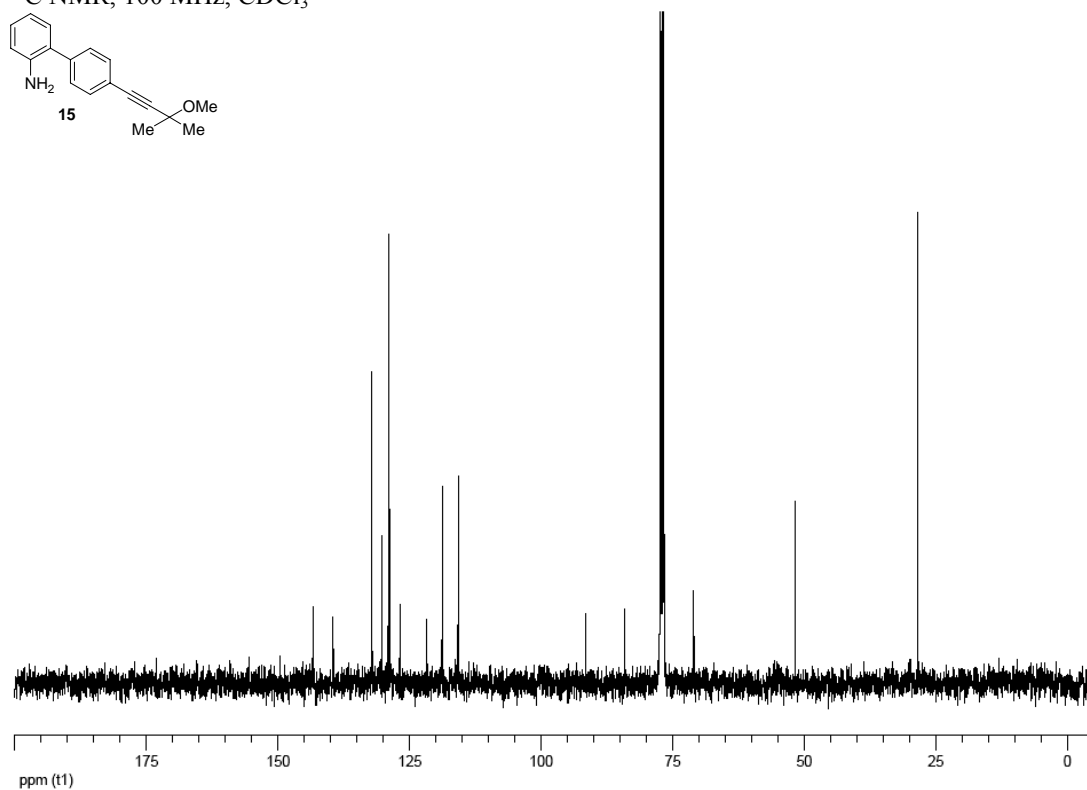

$^1\text{H}$  NMR, 400 MHz,  $\text{CDCl}_3$

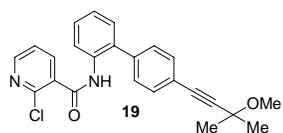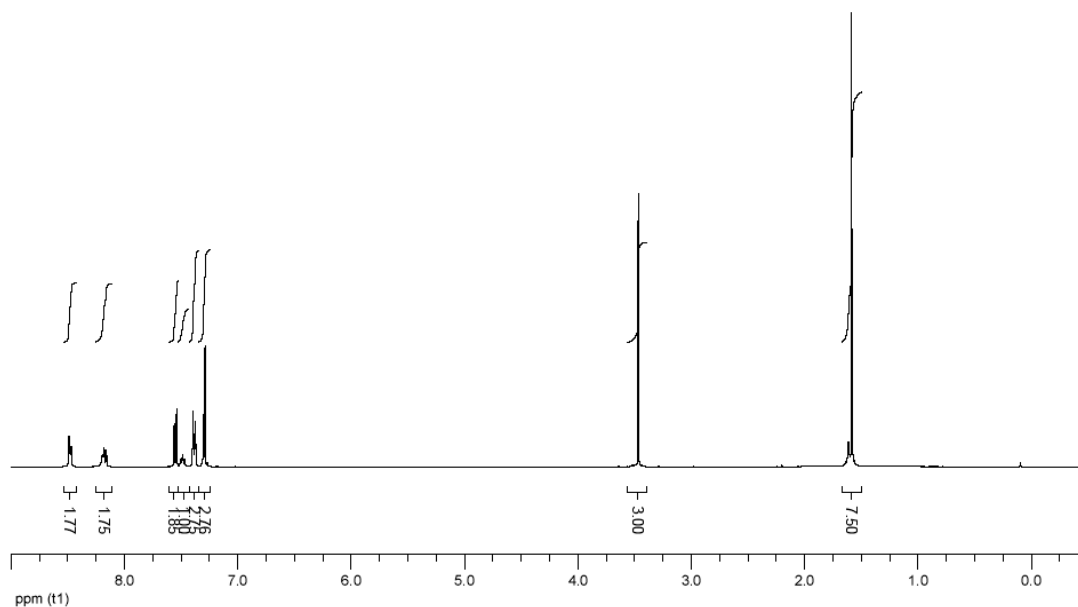

$^{13}\text{C}$  NMR, 100 MHz,  $\text{CDCl}_3$

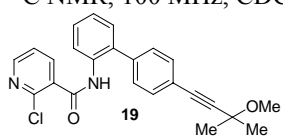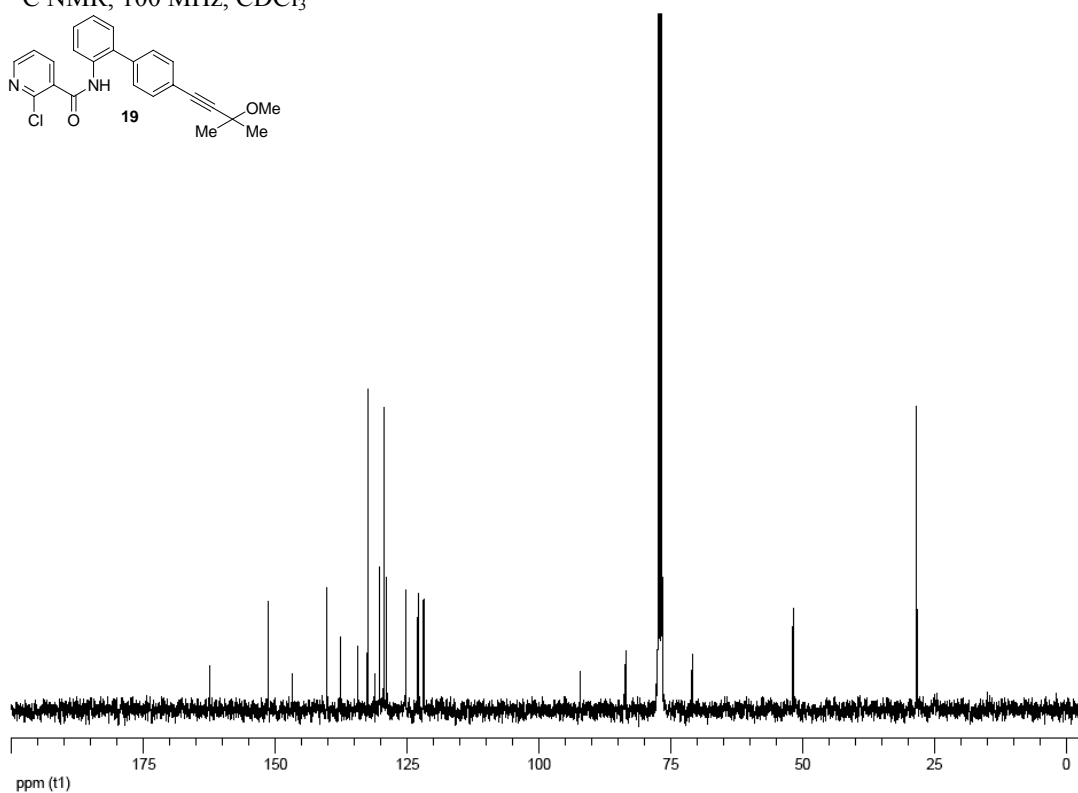

Supplement: b707517k.pdf [file b707517k.pdf]
